# Supplementary material for: A substrate-dependent reaction of 1-aryl-2-alkyl-1,2-diketones with 2-aroyl-1-chlorocyclopropanecarboxylates: selective access to 2′,5′-dicyclopropoxy-1,1′:4′,1′′-teraryls and pentafulvenes
Source: Royal Society of Chemistry journal article supplement (doi:10.1039/d2ob00971d), 2022-01-01
Supplement: d2ob00971d1.pdf [file d2ob00971d1.pdf]

## Supporting Information

### Substrate-dependent reaction of 1-aryl-2-alkyl-1,2-diketones with 2-aryl-1-chlorocyclopropanecarboxylates: selective access to 2',5'-dicyclopropoxy-1,1':4',1''-teraryls and pentafulvenes

*Meher Prakash, Poonam Rani and Sampak Samanta*<sup>\*,a</sup>

<sup>a</sup>Department of Chemistry, Indian Institute of Technology Indore, Simrol, Indore-453552, Madhya Pradesh, India.

#### Table of Contents:

|                                                                                               |         |
|-----------------------------------------------------------------------------------------------|---------|
| <sup>1</sup> H and <sup>13</sup> C NMR spectra of cyclopropanes and pentafulvenes .....       | S2-S43  |
| <sup>1</sup> H and <sup>13</sup> C NMR spectra of 2,5-diphenylhydroquinone( <b>1aa</b> )..... | S44     |
| <sup>1</sup> H and <sup>13</sup> C NMR spectra of furan derivative ( <b>12</b> ) .....        | S45     |
| <sup>1</sup> H and <sup>13</sup> C NMR of 1,2-diketones.....                                  | S46-S60 |
| <sup>1</sup> H and <sup>13</sup> C NMR of compound <b>13</b> .....                            | S61     |
| Single-Crystal X-ray Diffraction data of <b>3aj</b> , <b>4qa</b> and <b>4vh</b> .....         | S62-S67 |

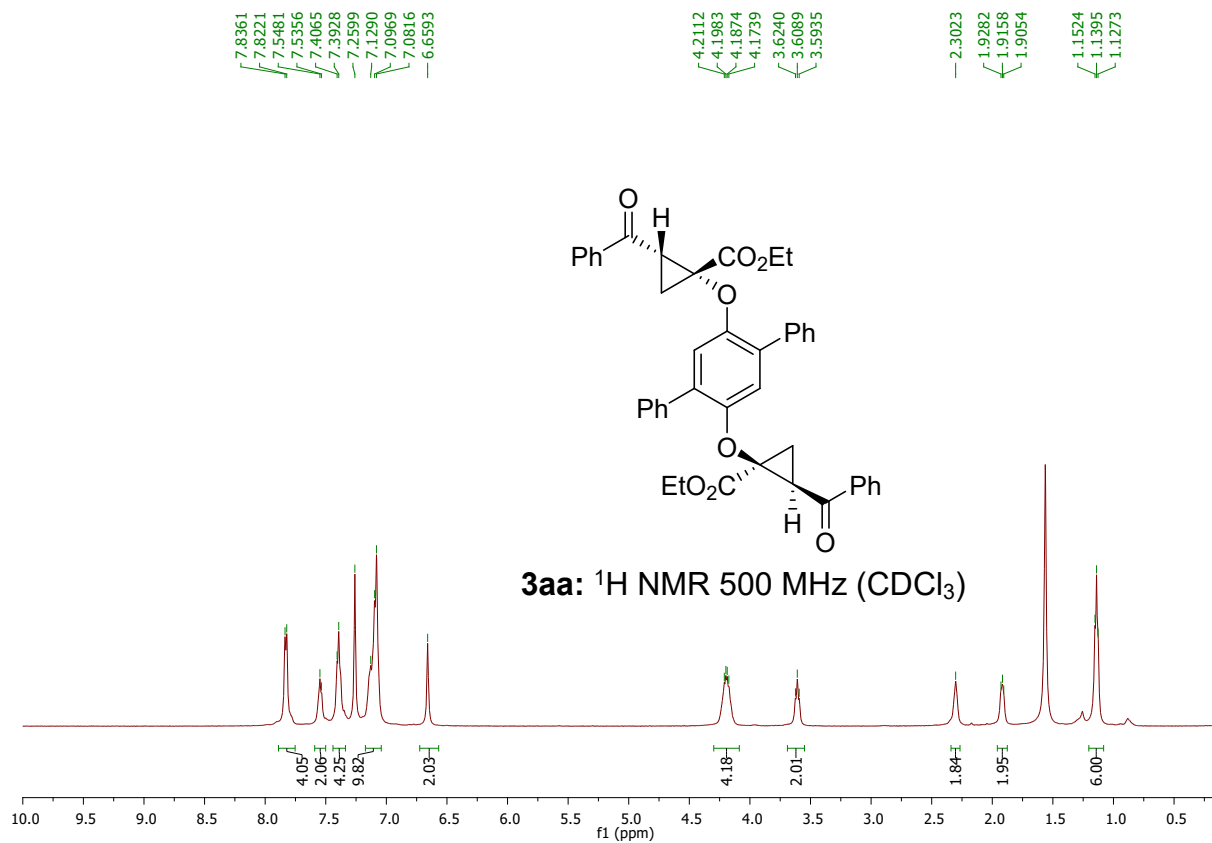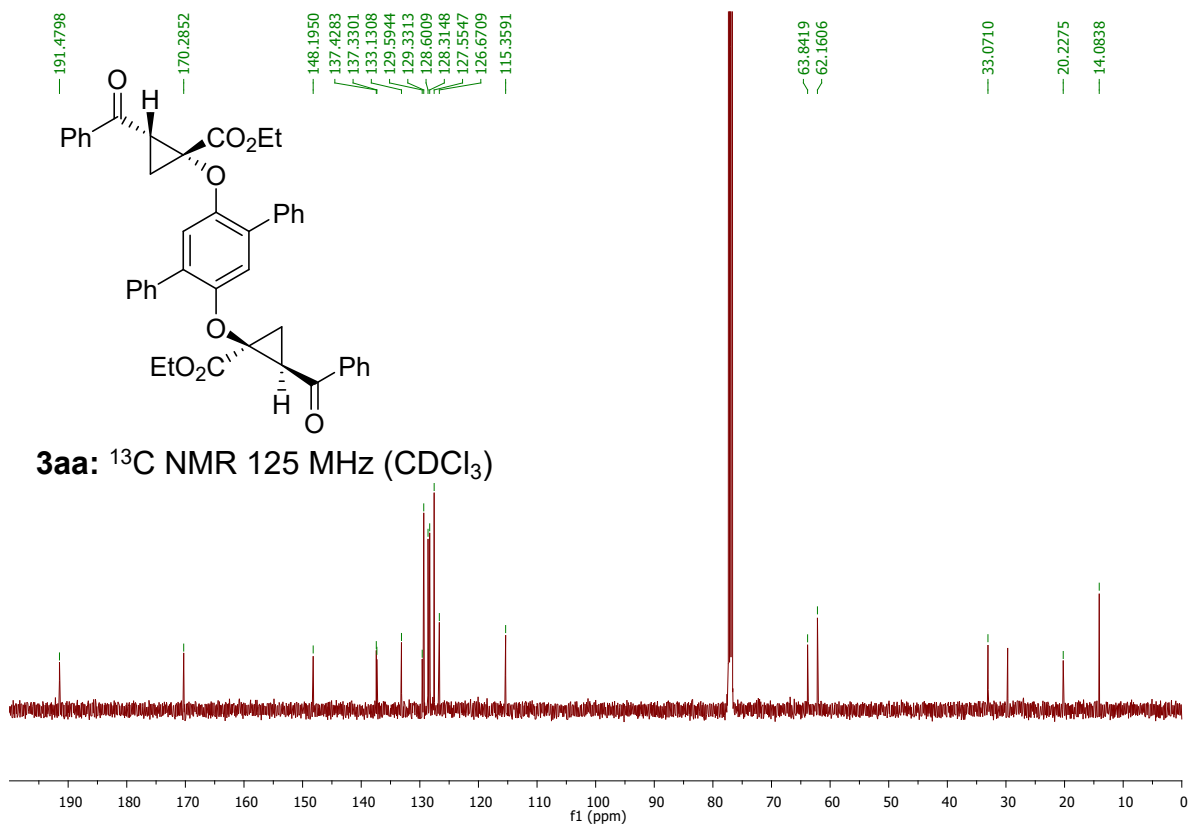

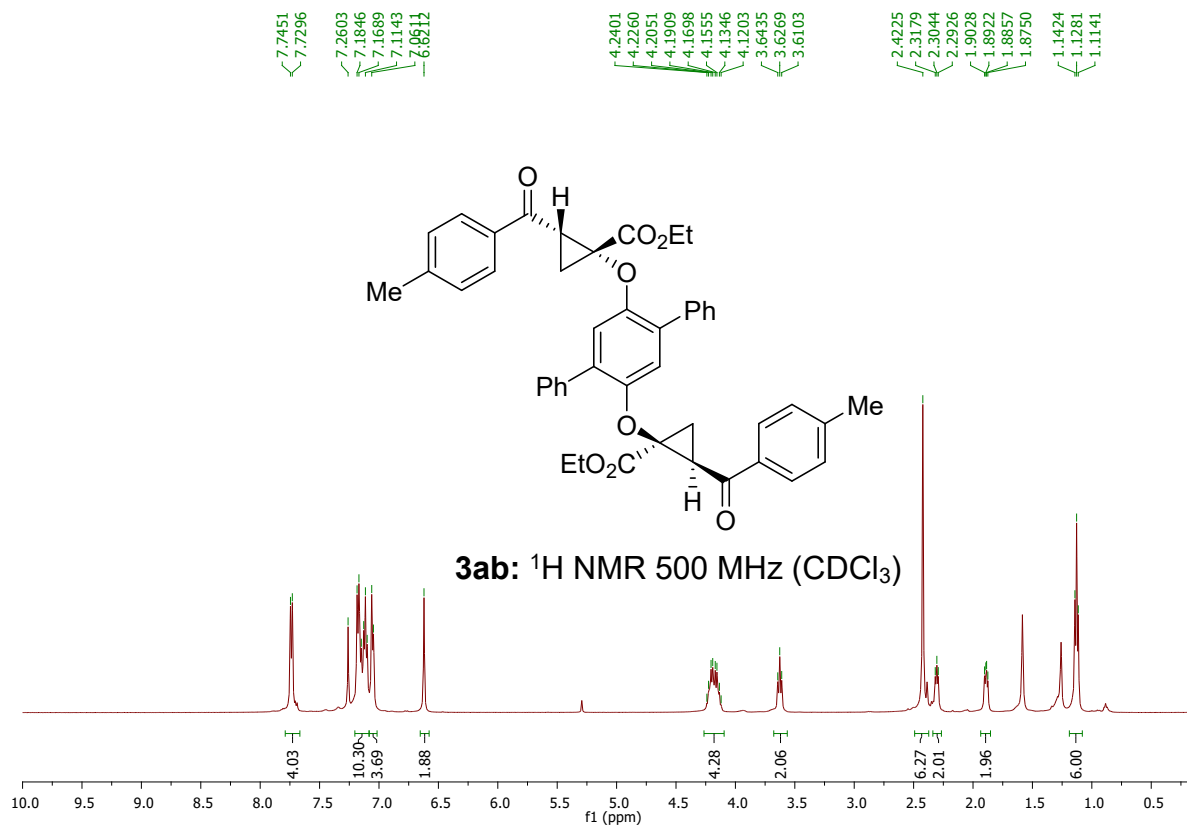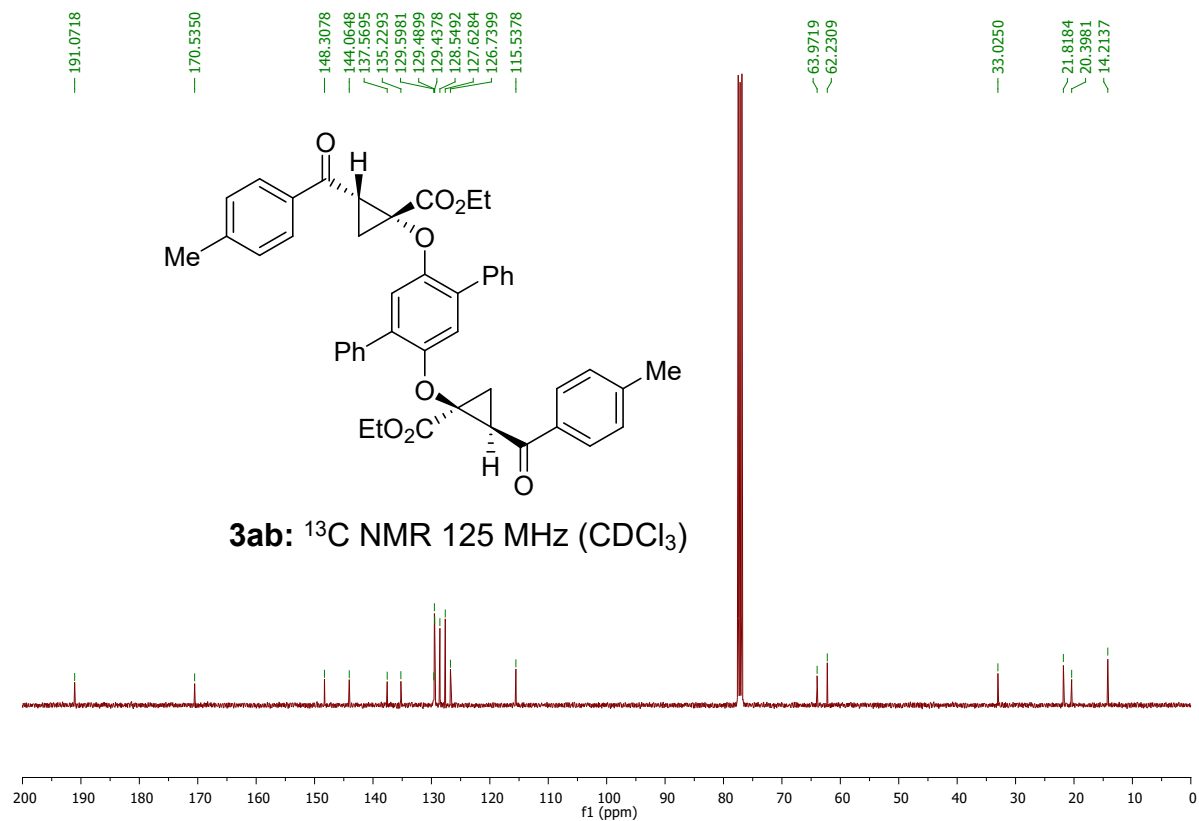

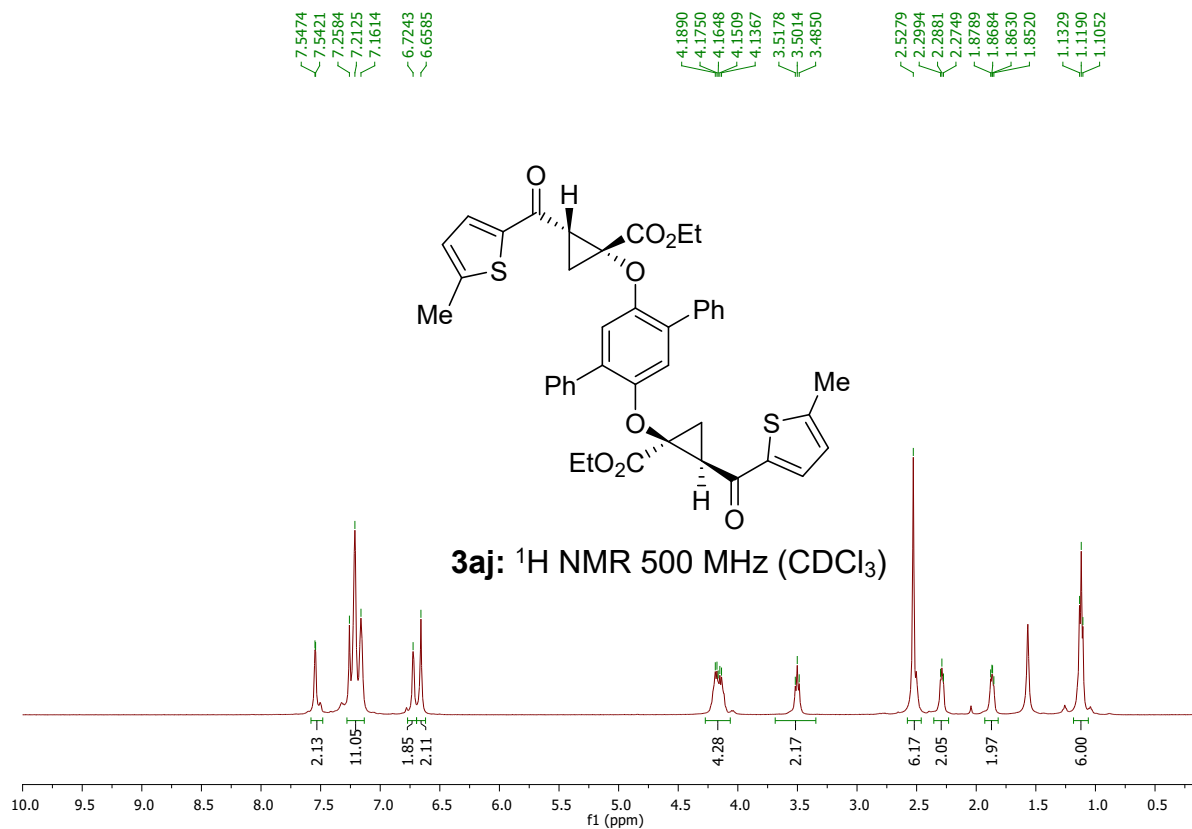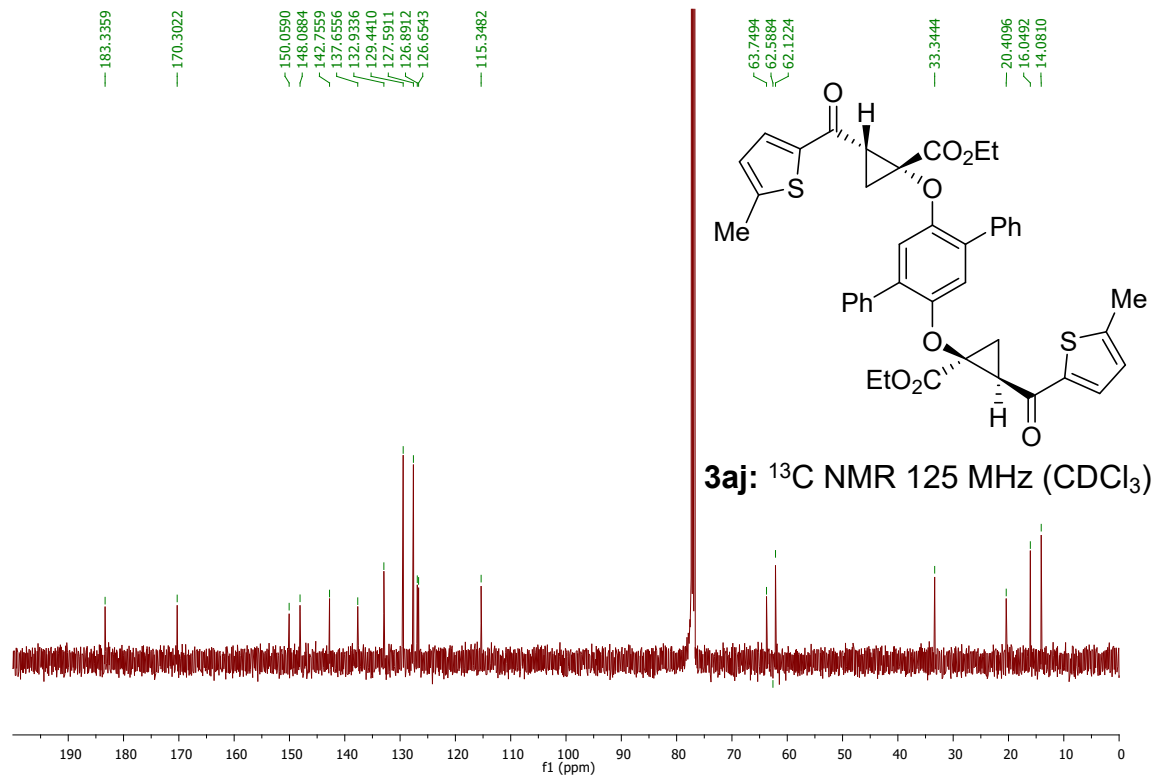

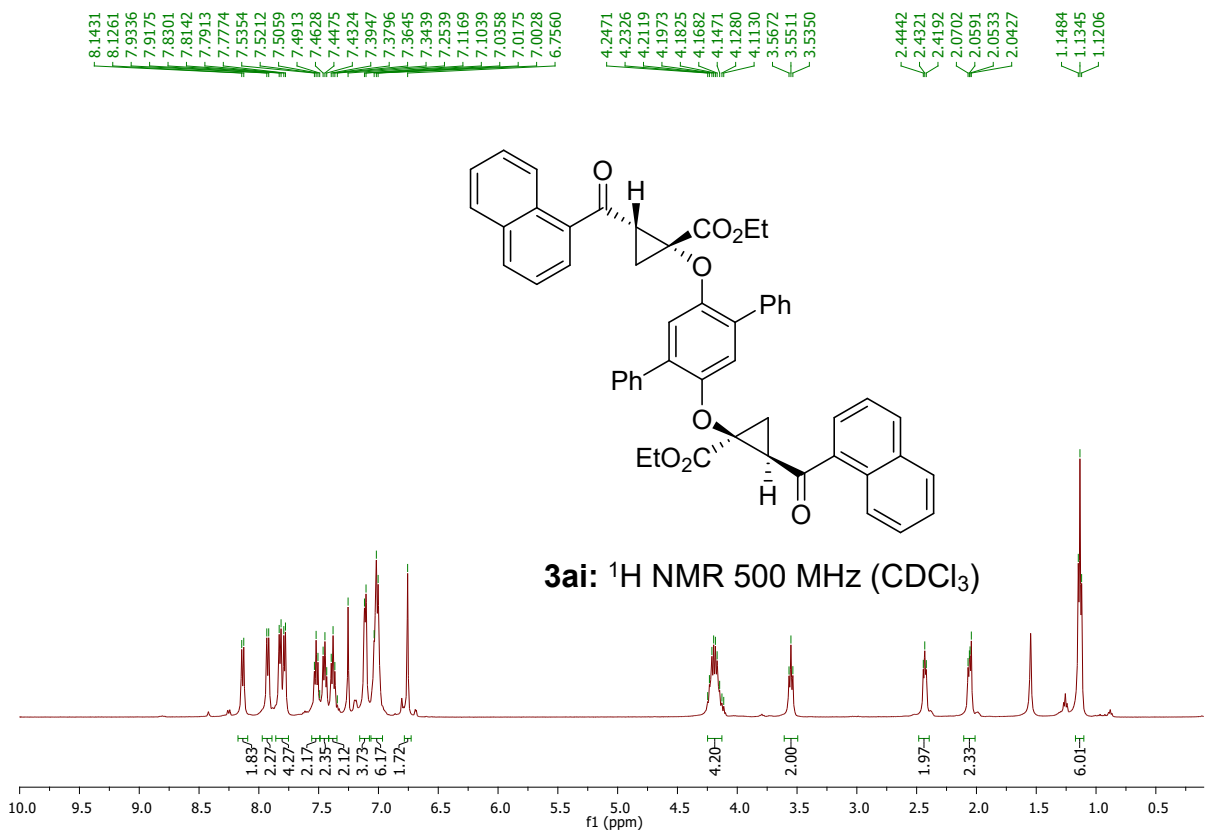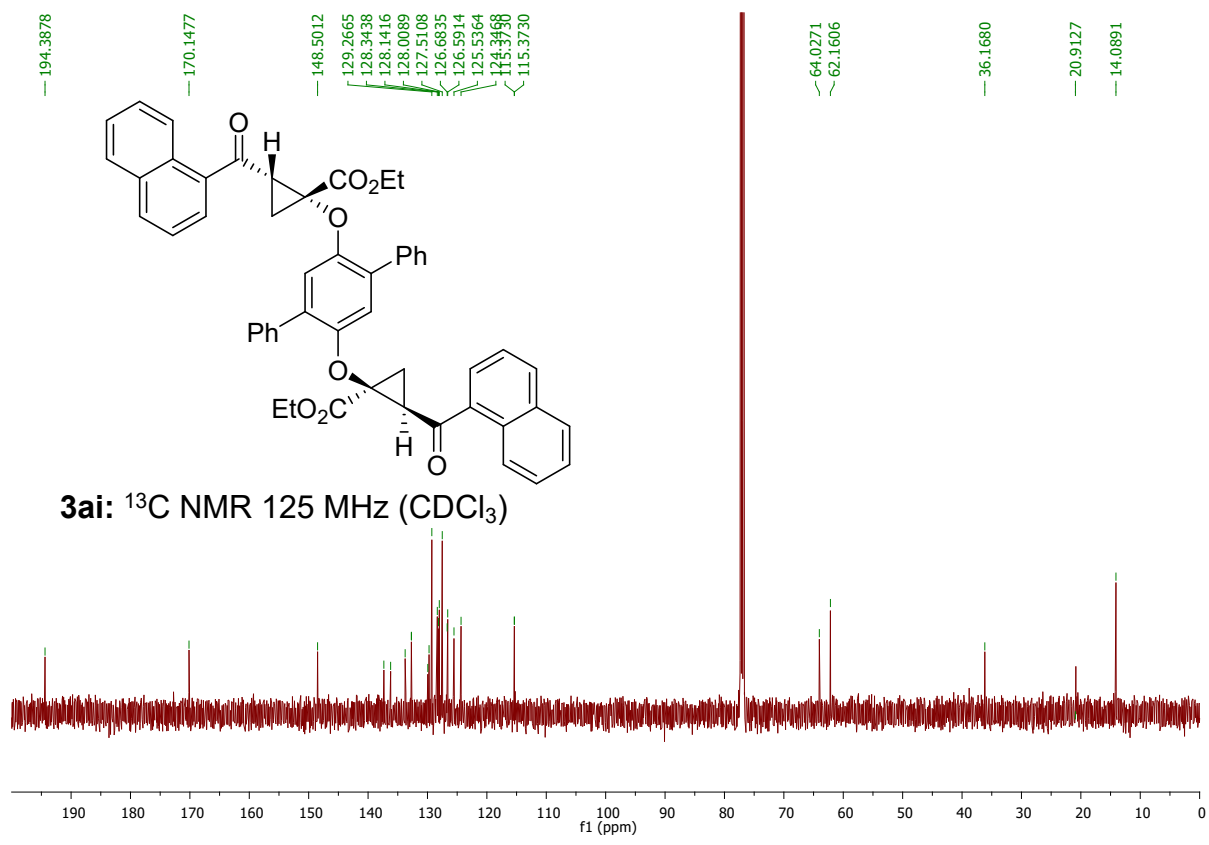

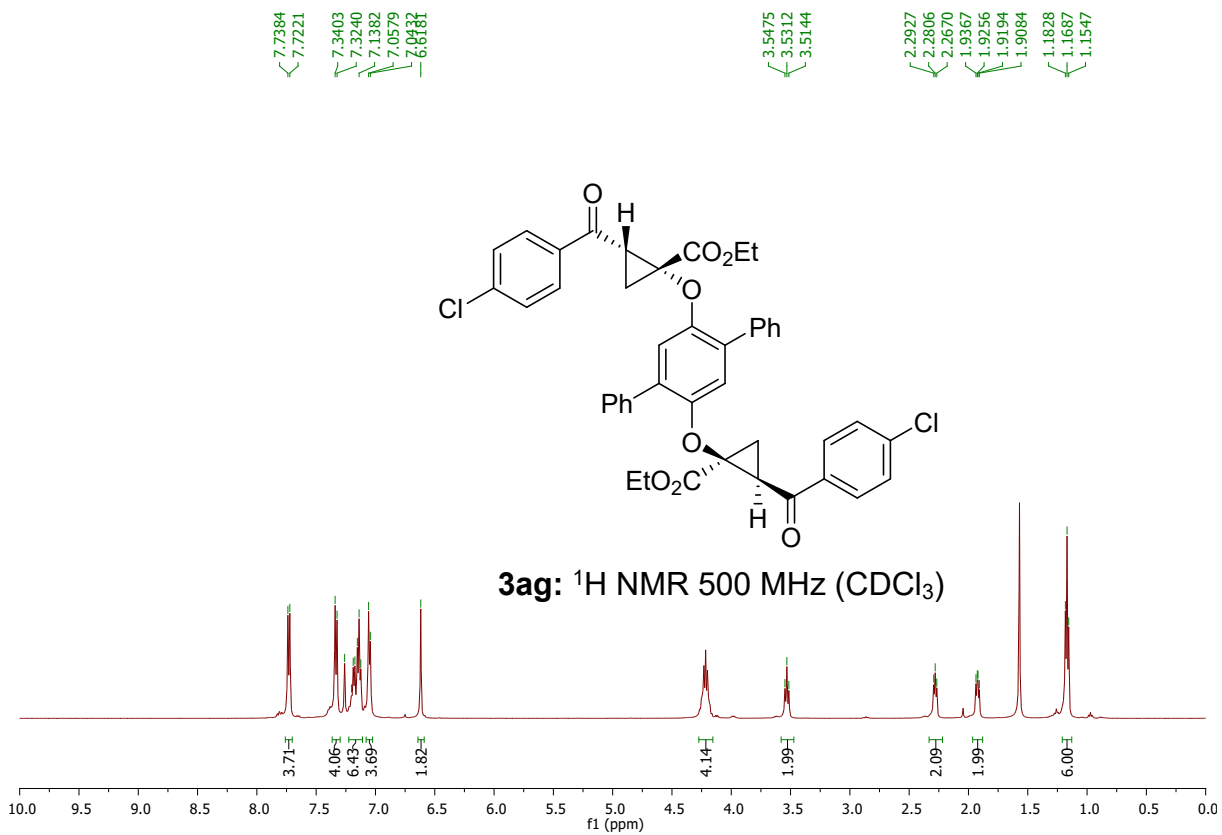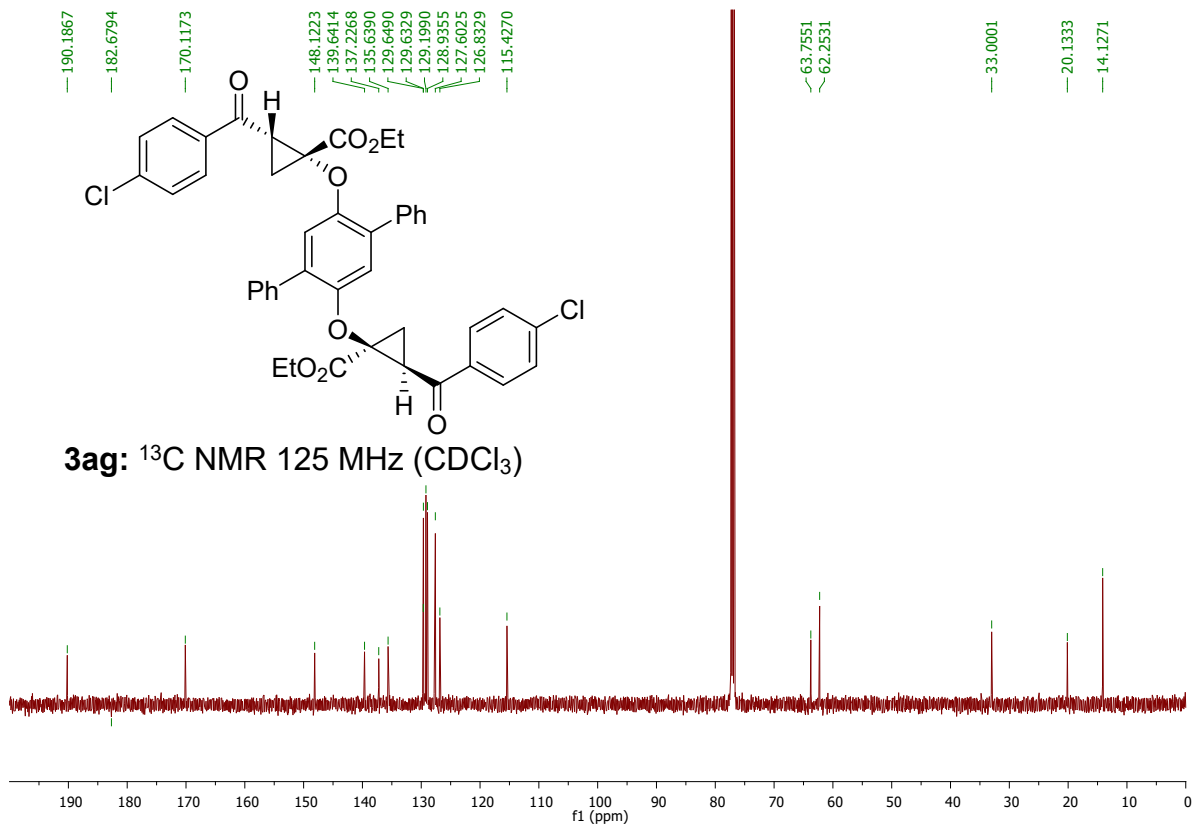

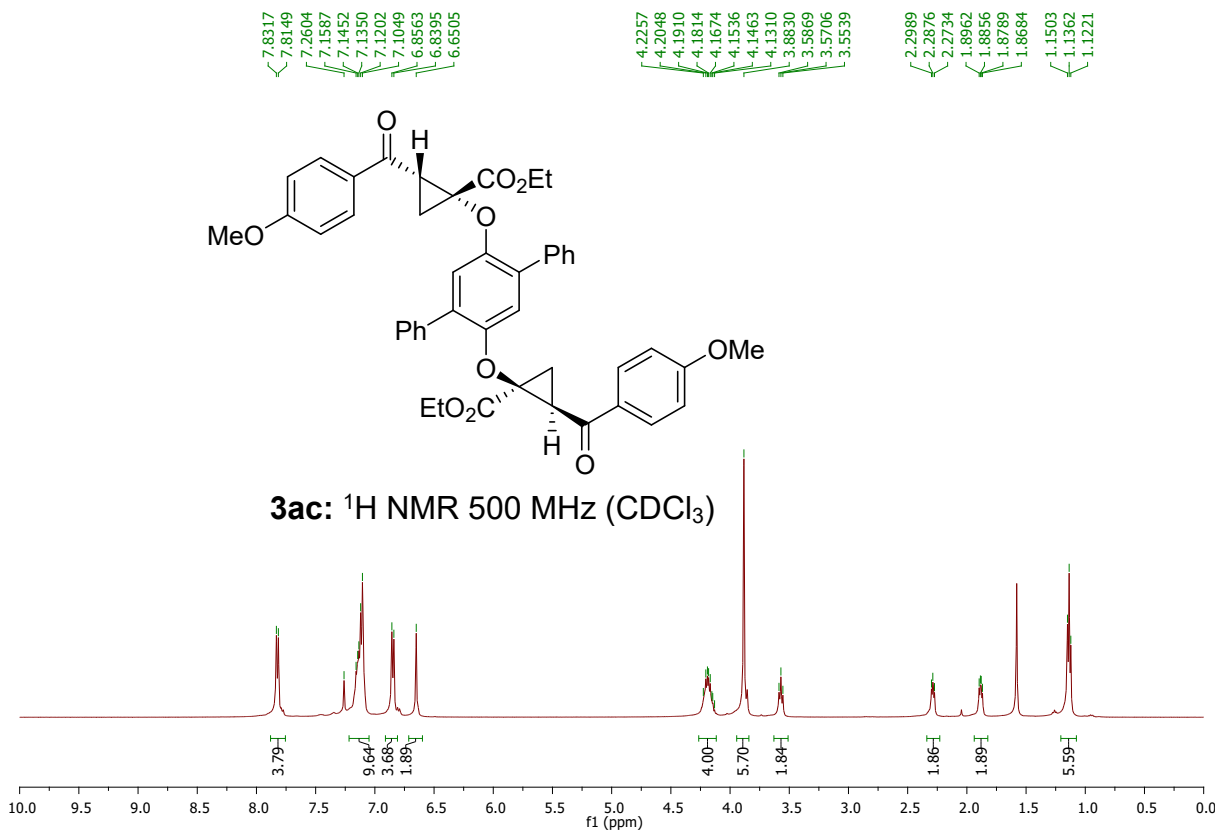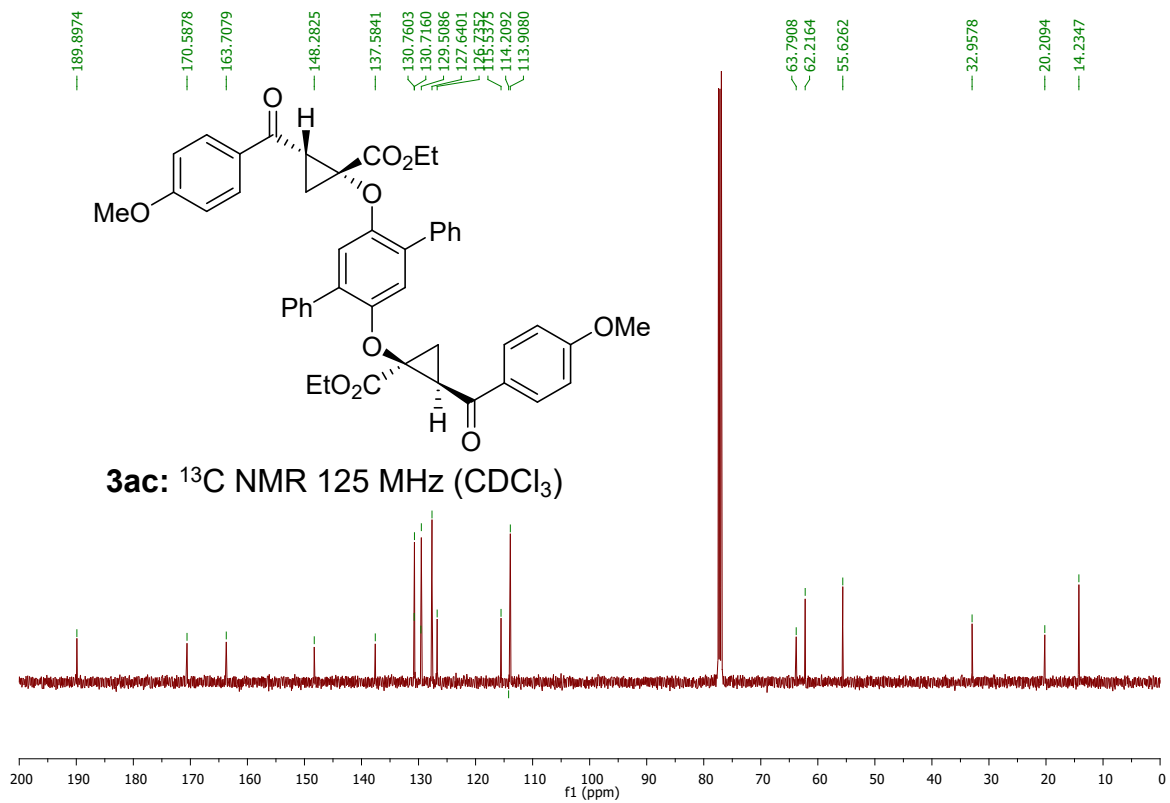

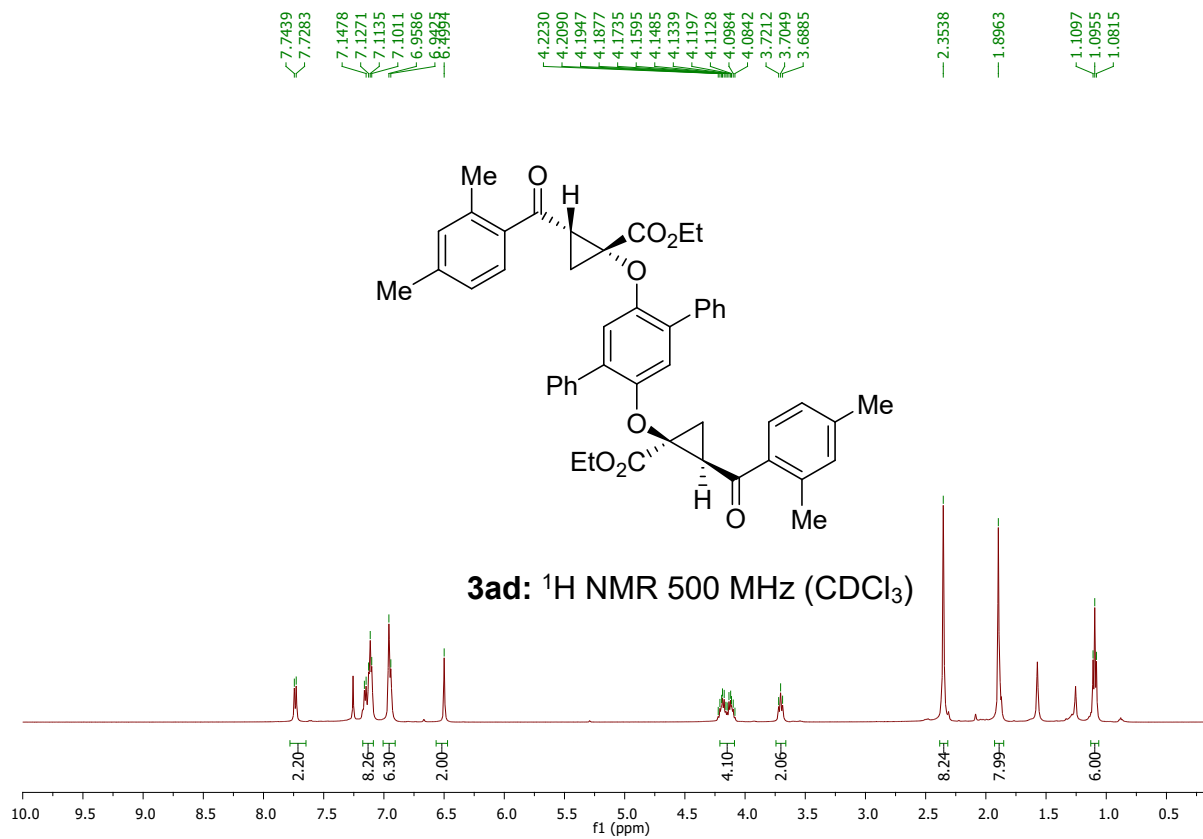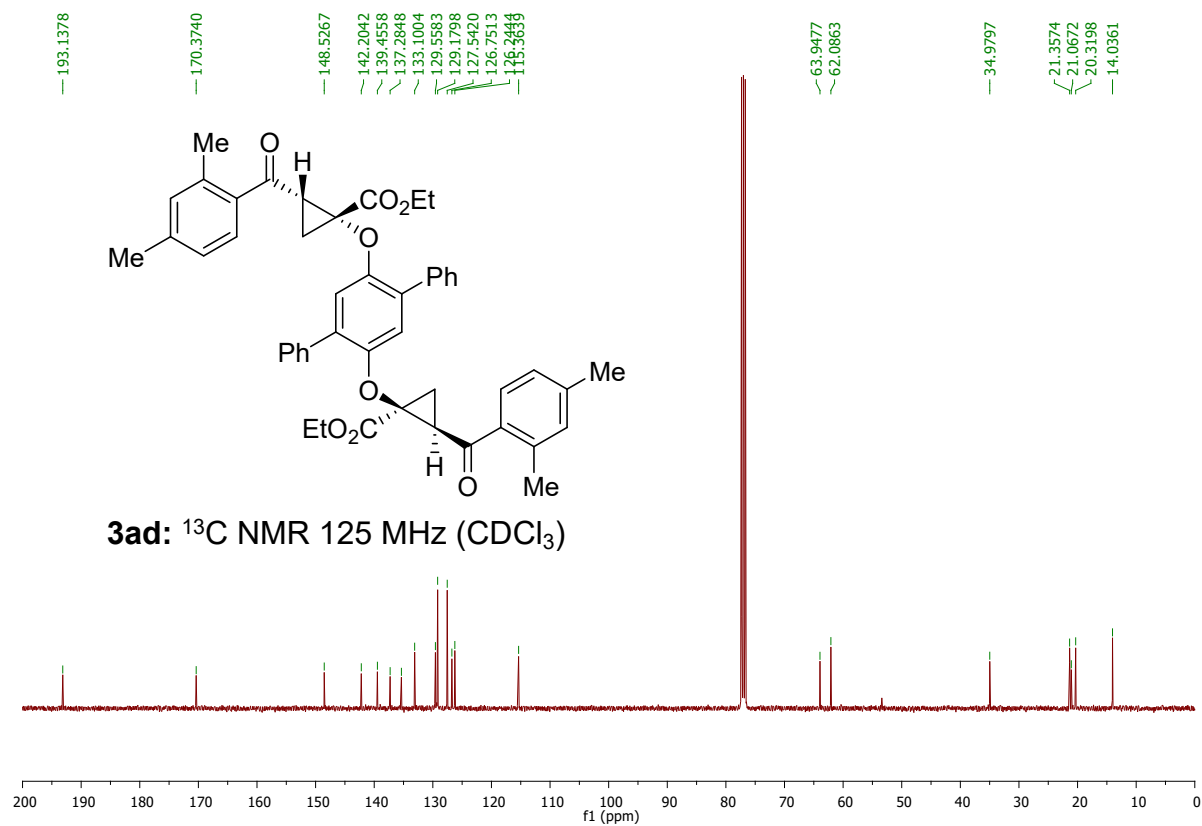



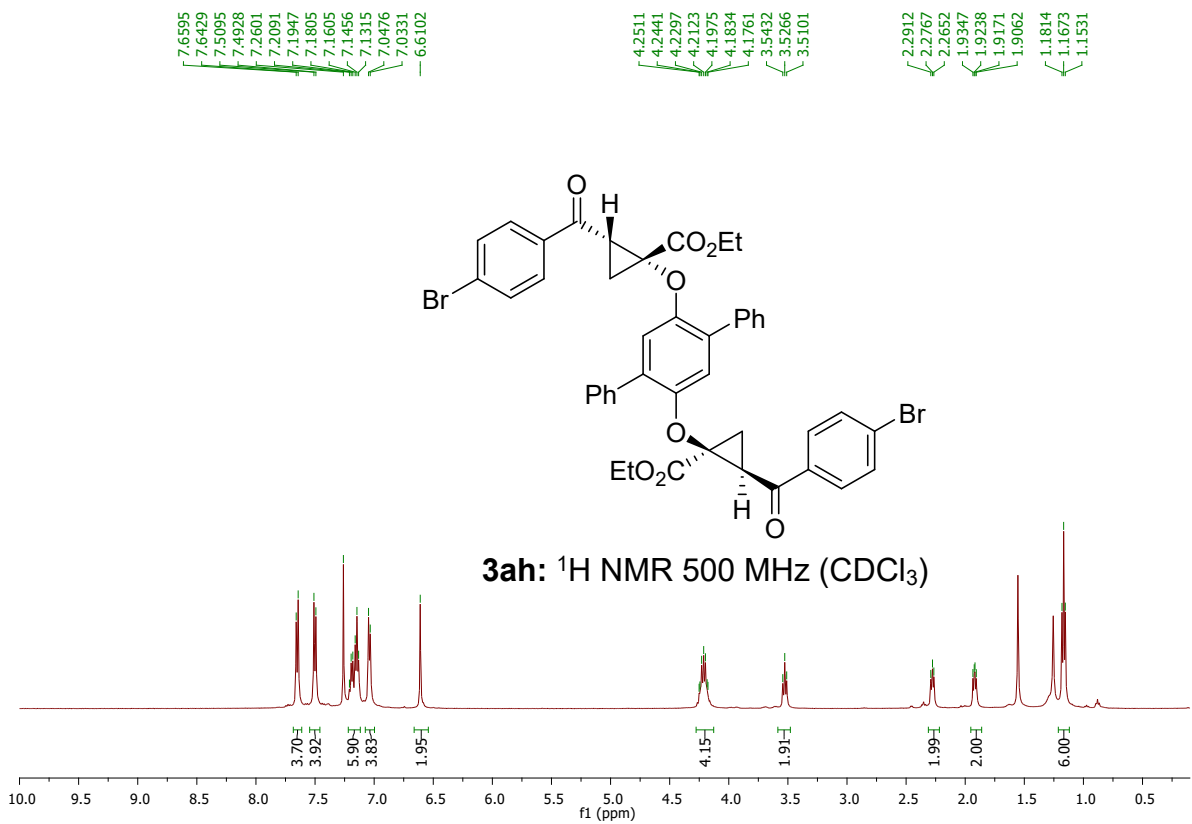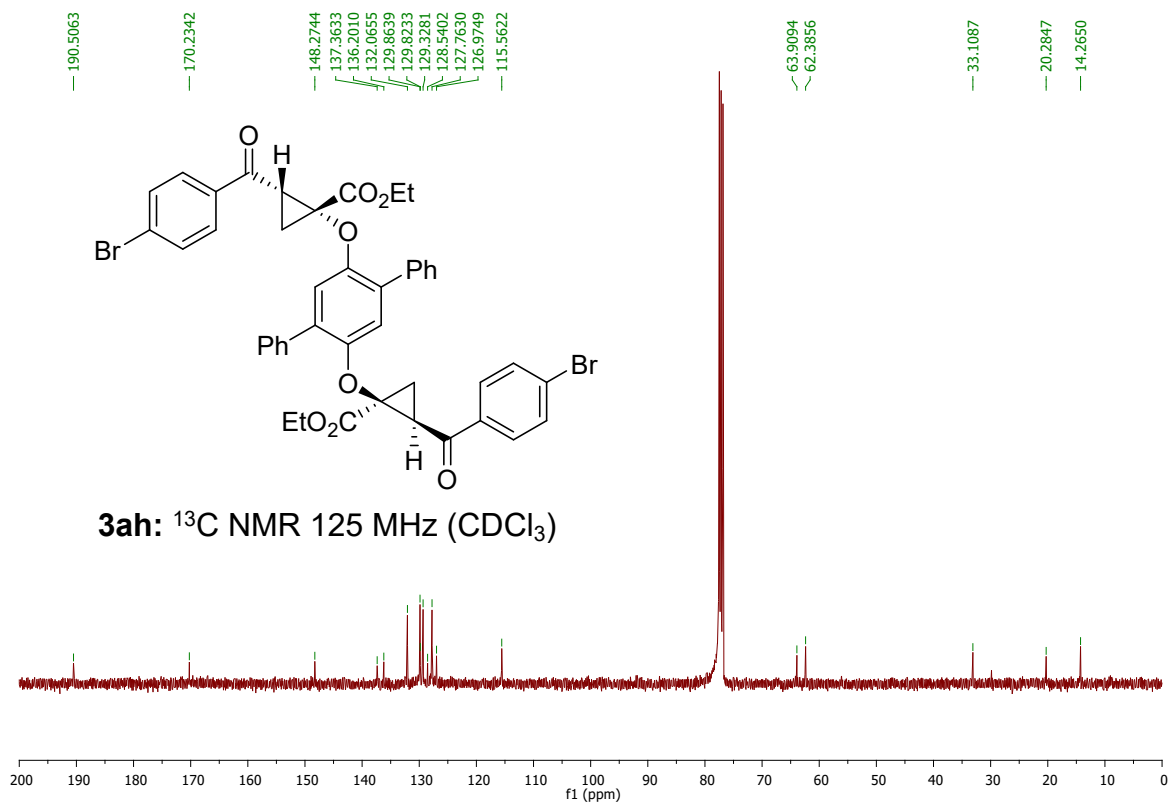

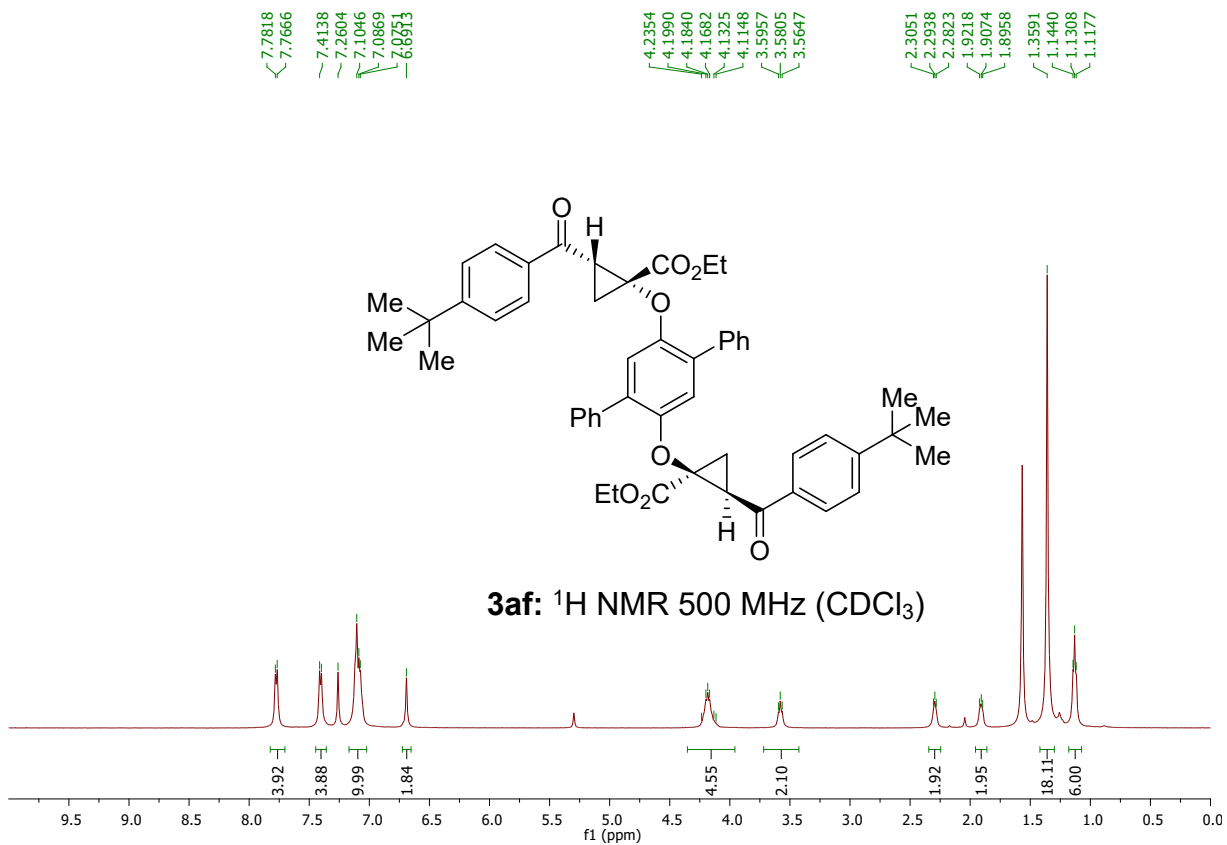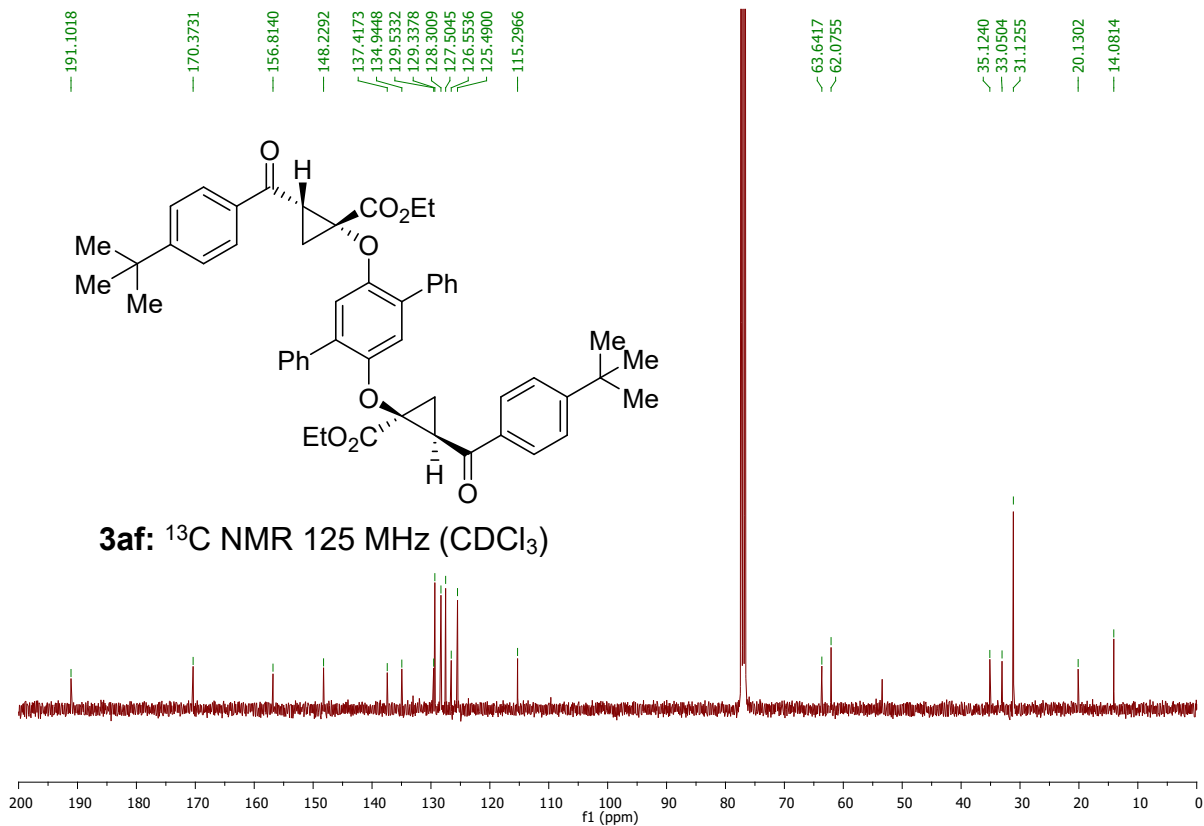

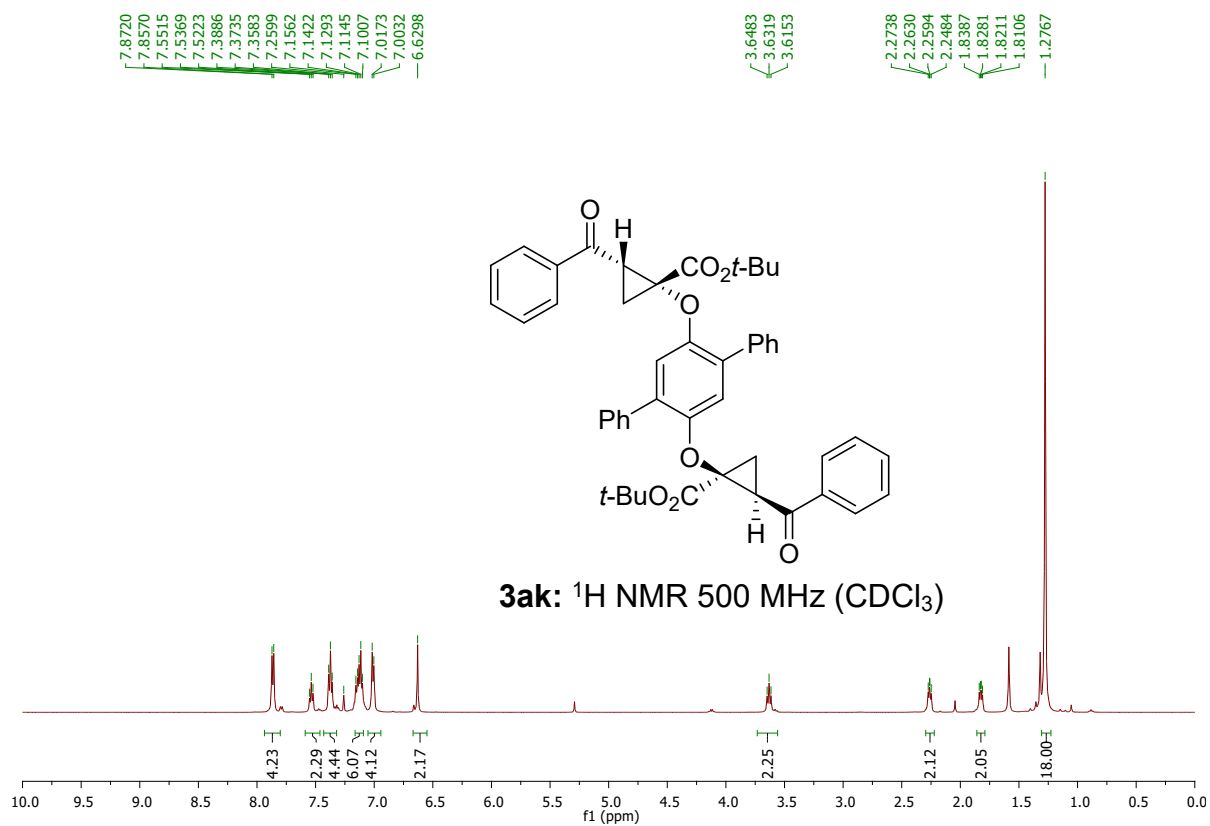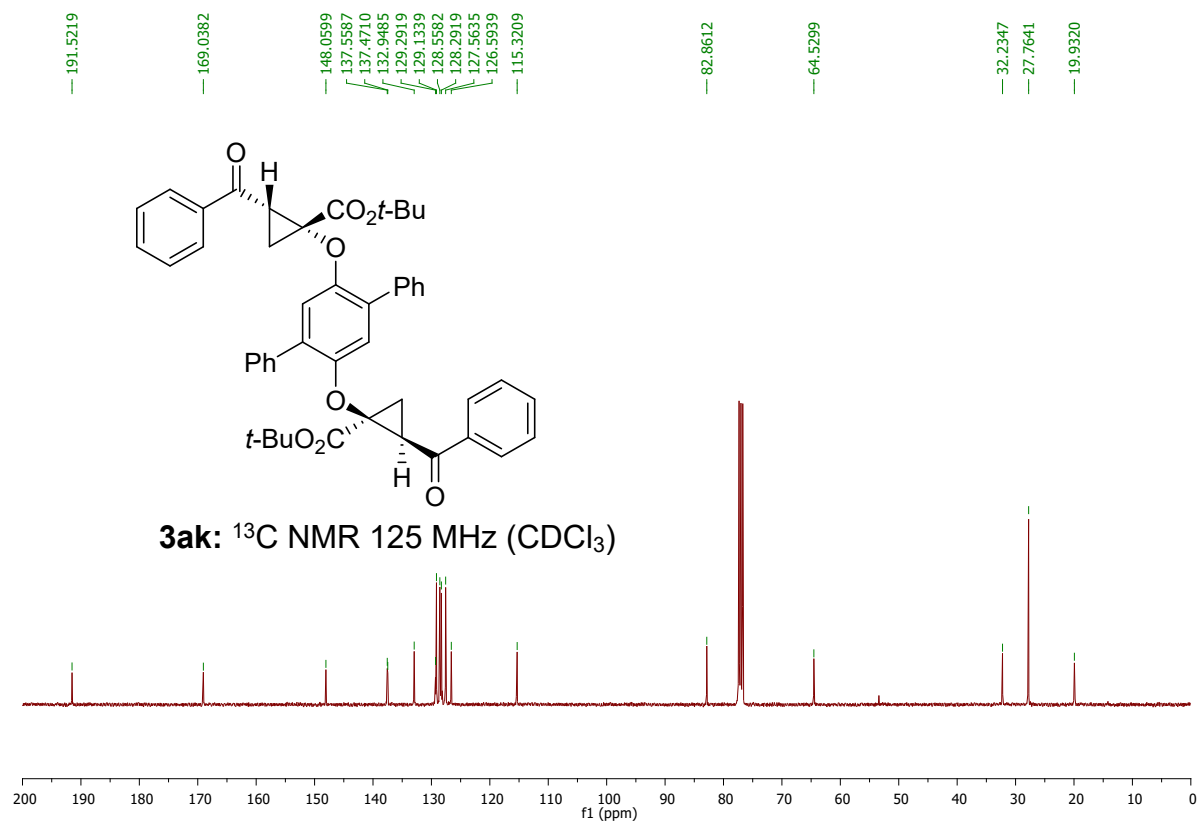

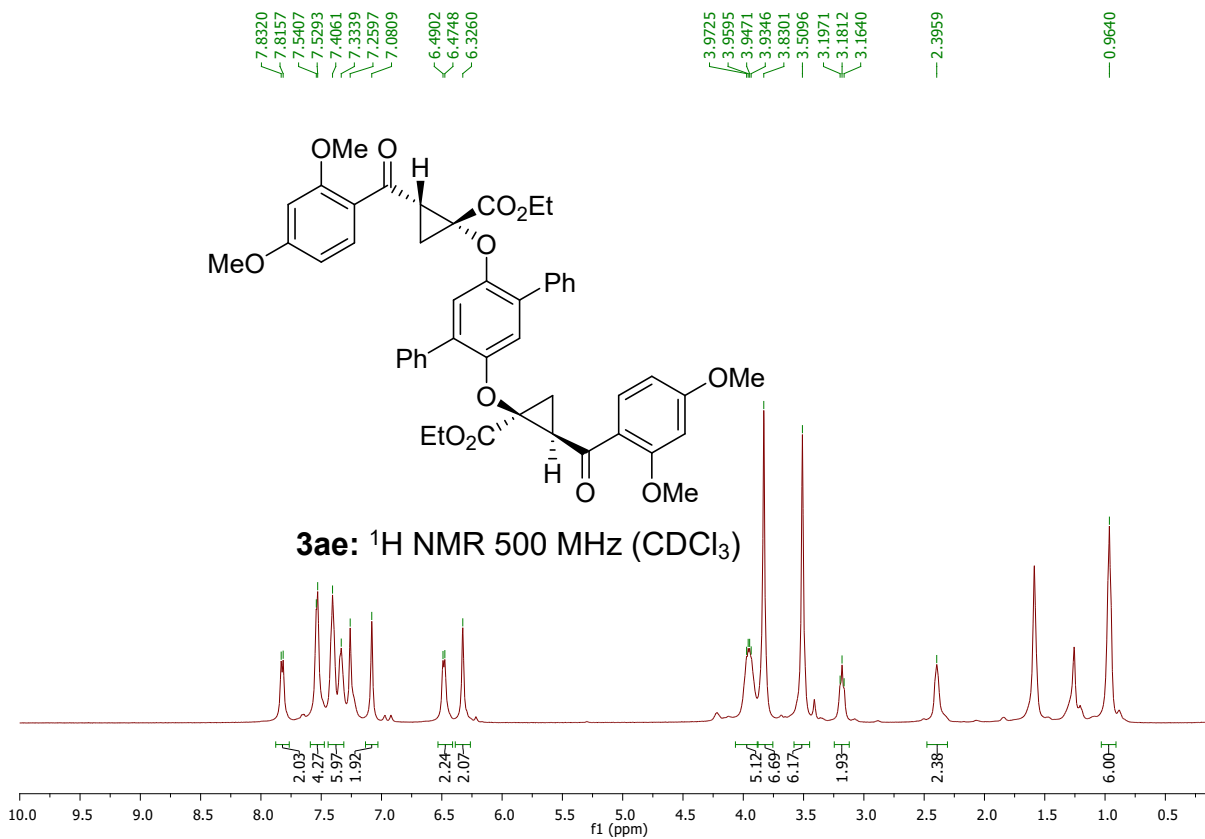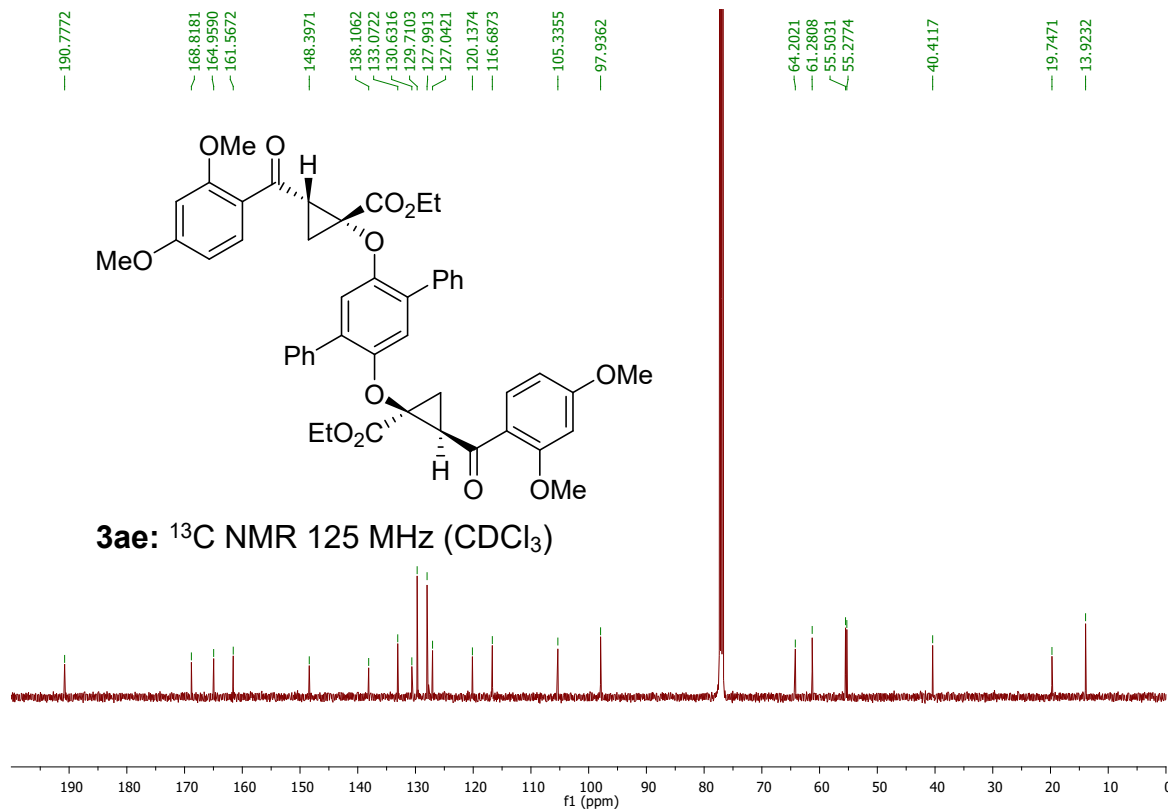

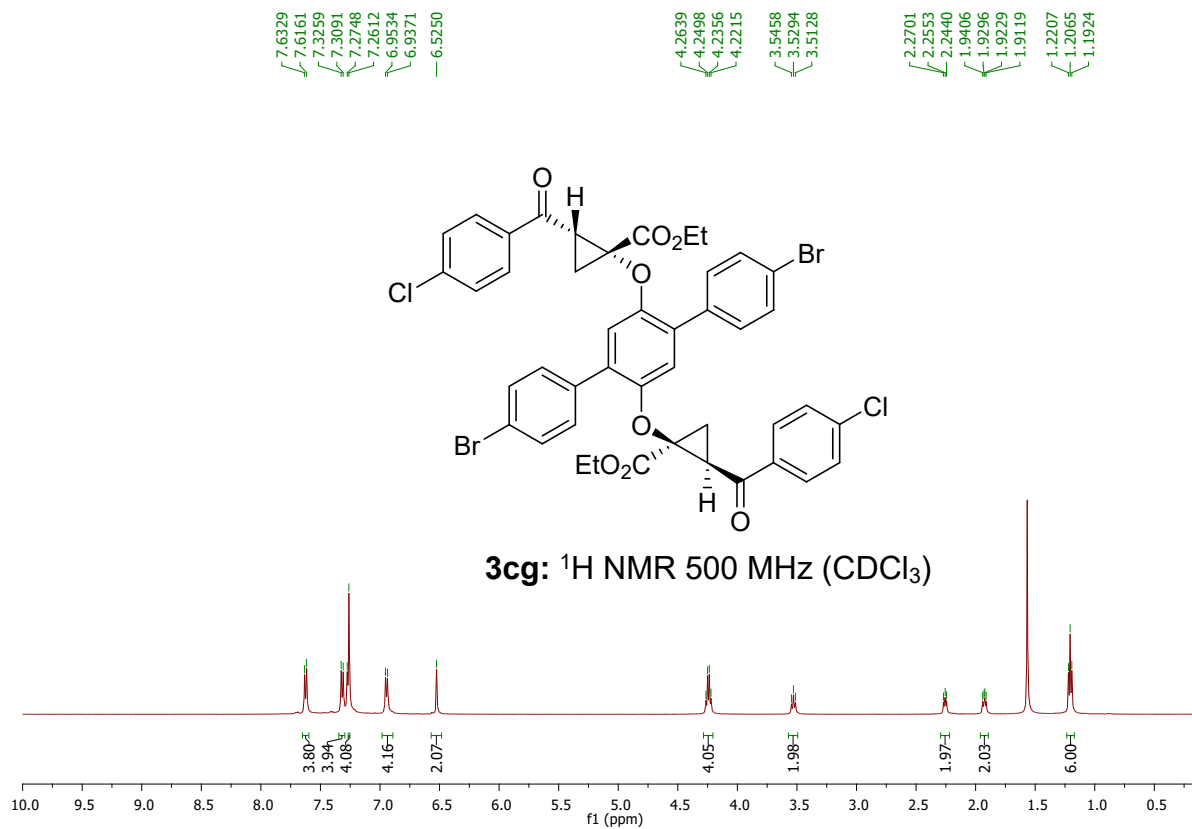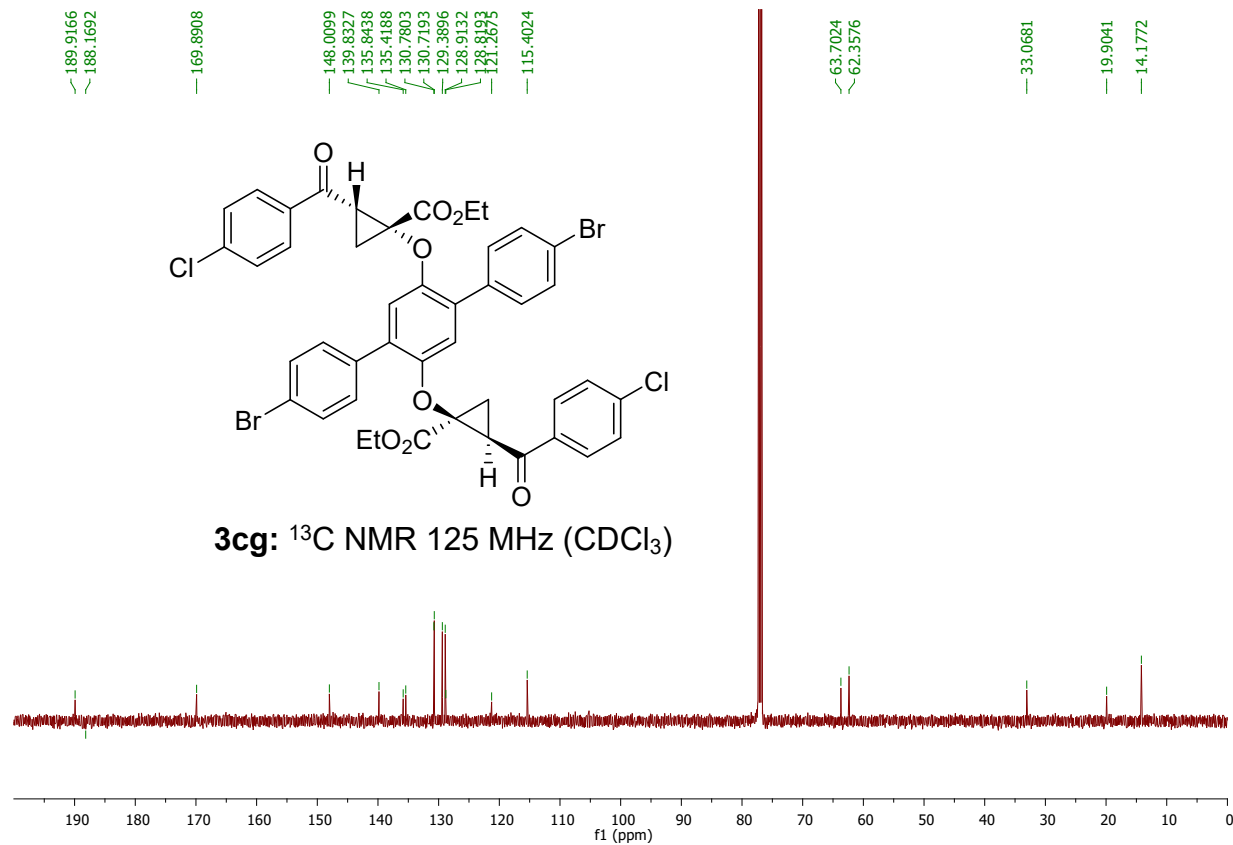

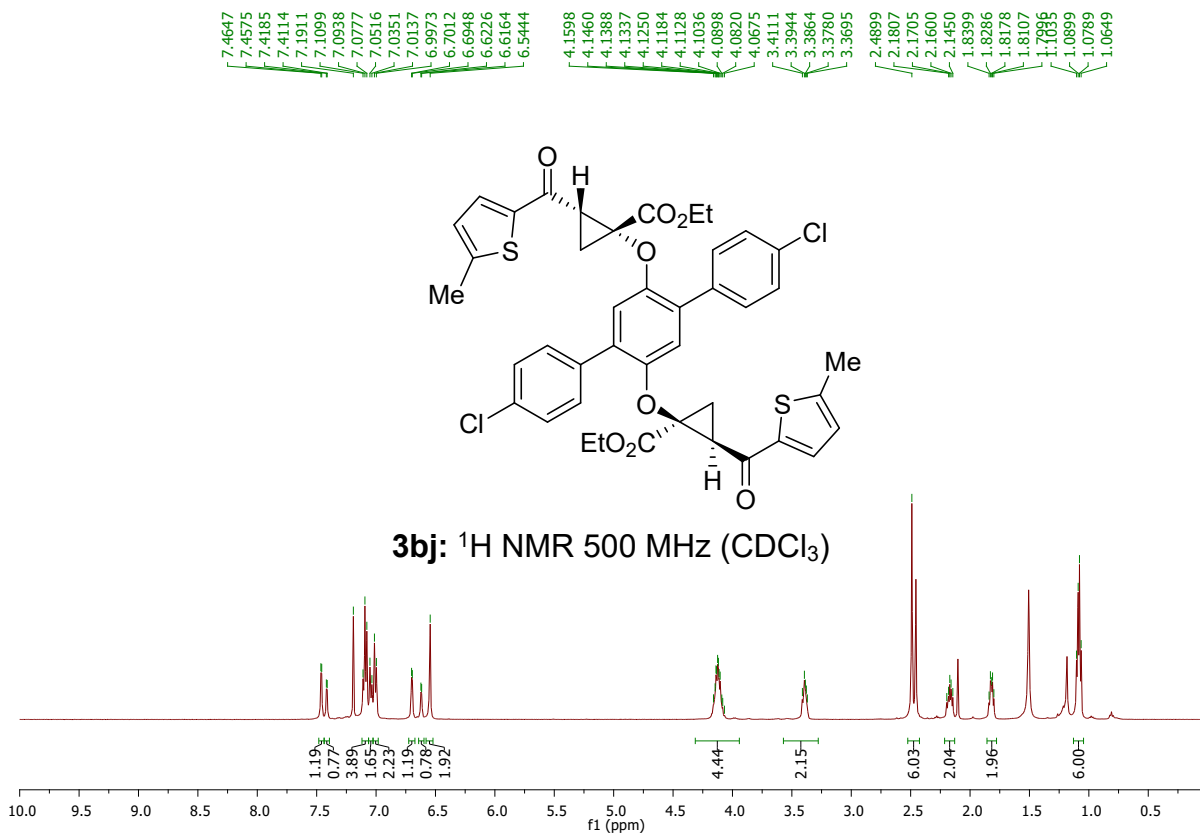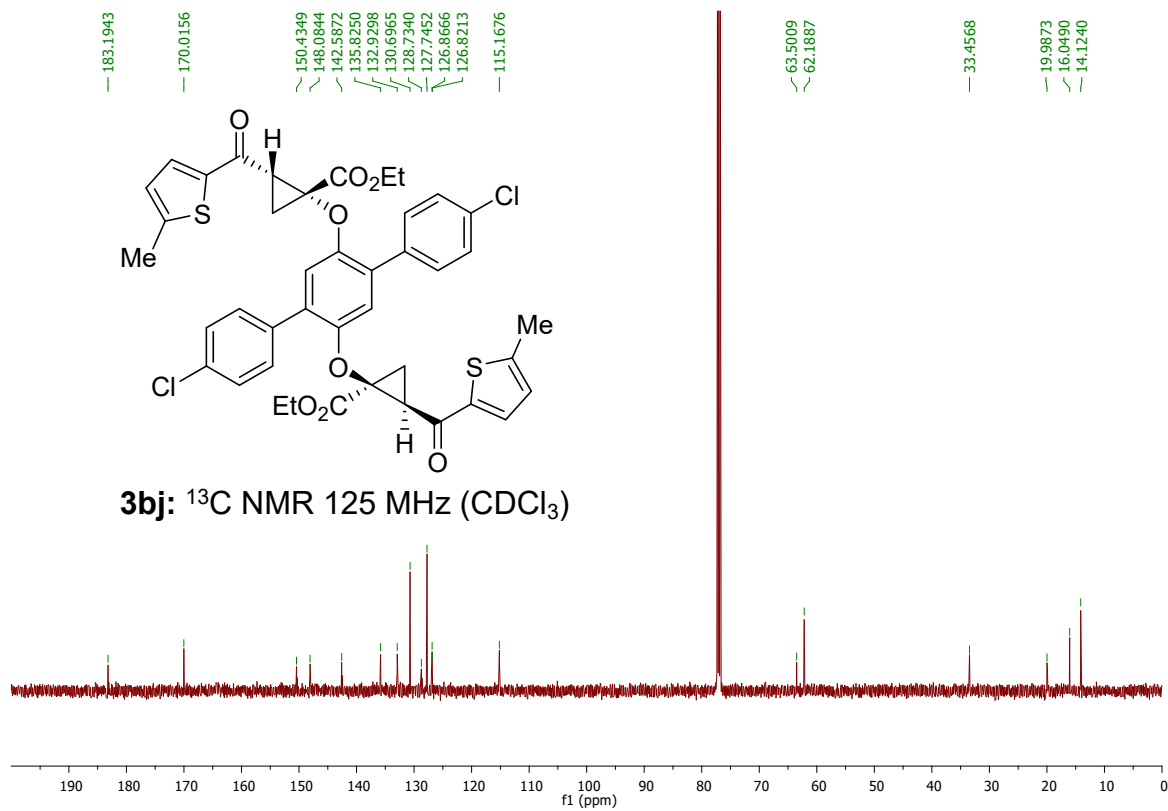

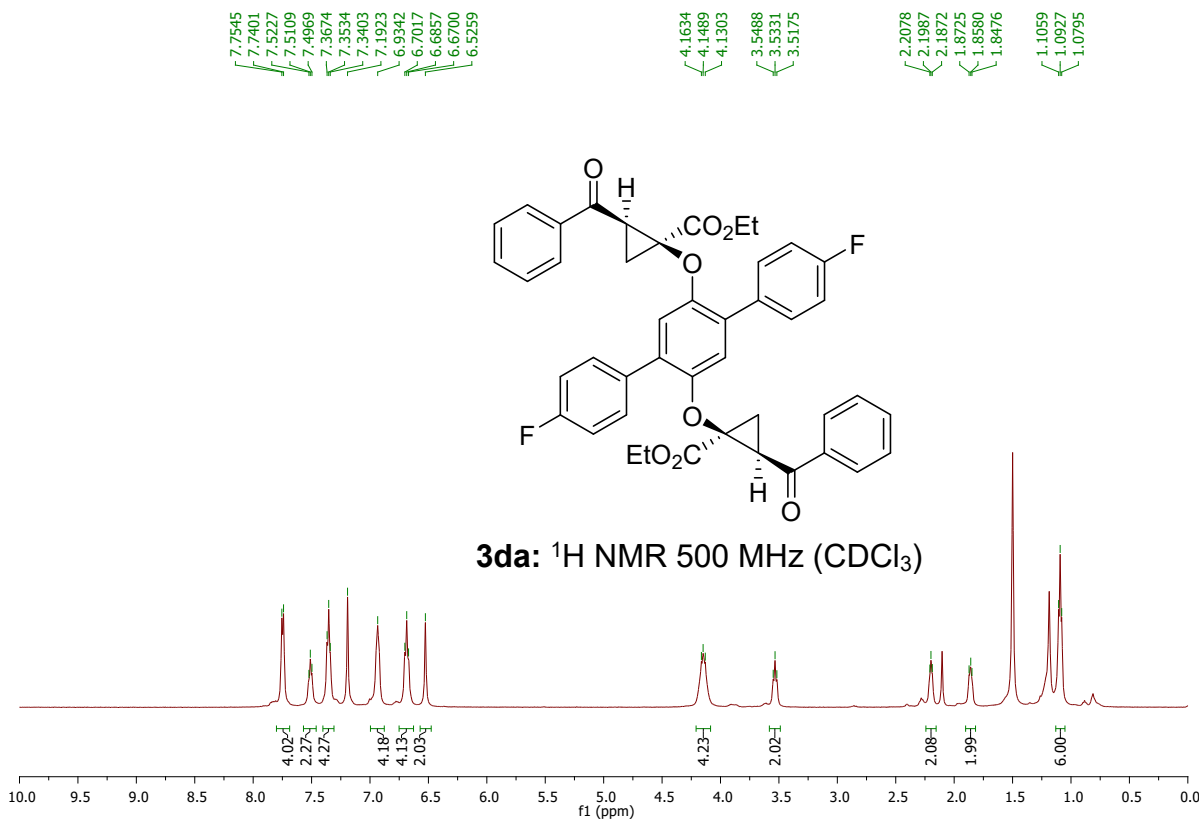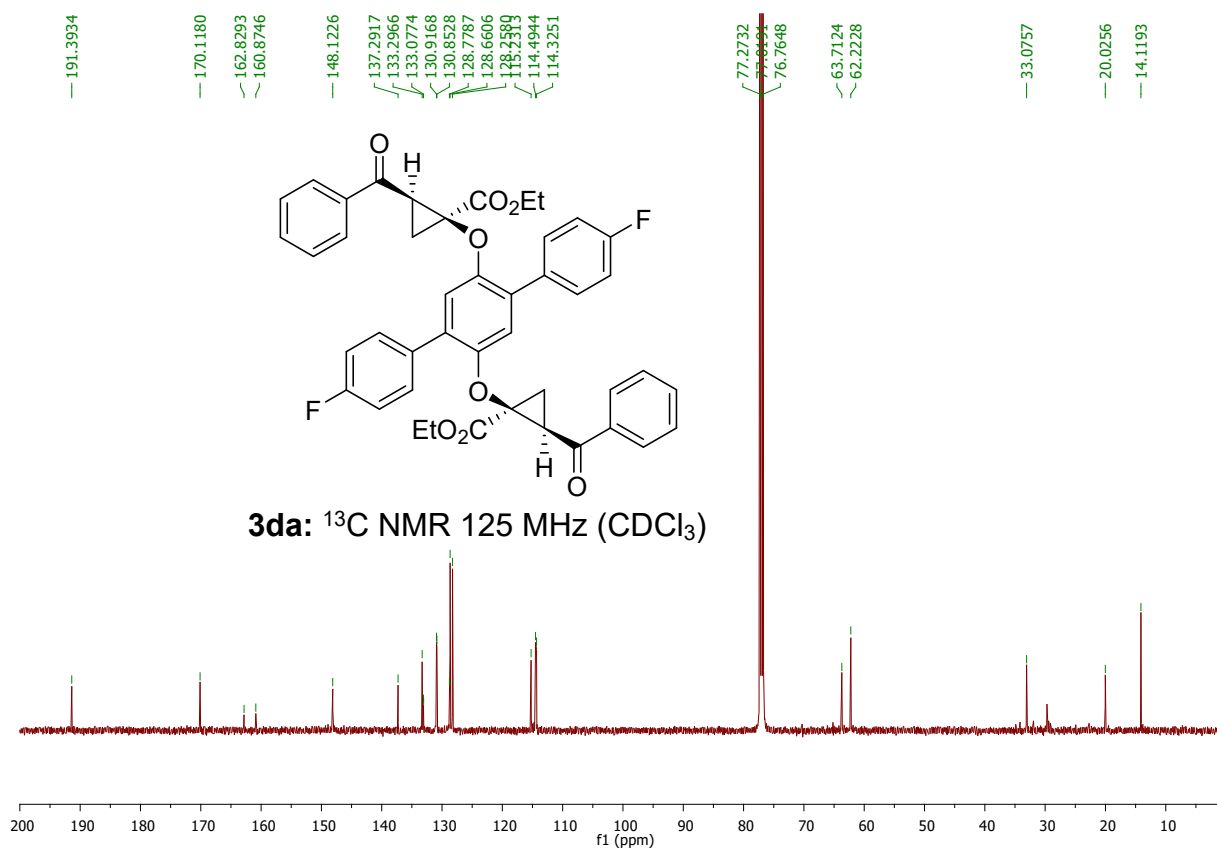

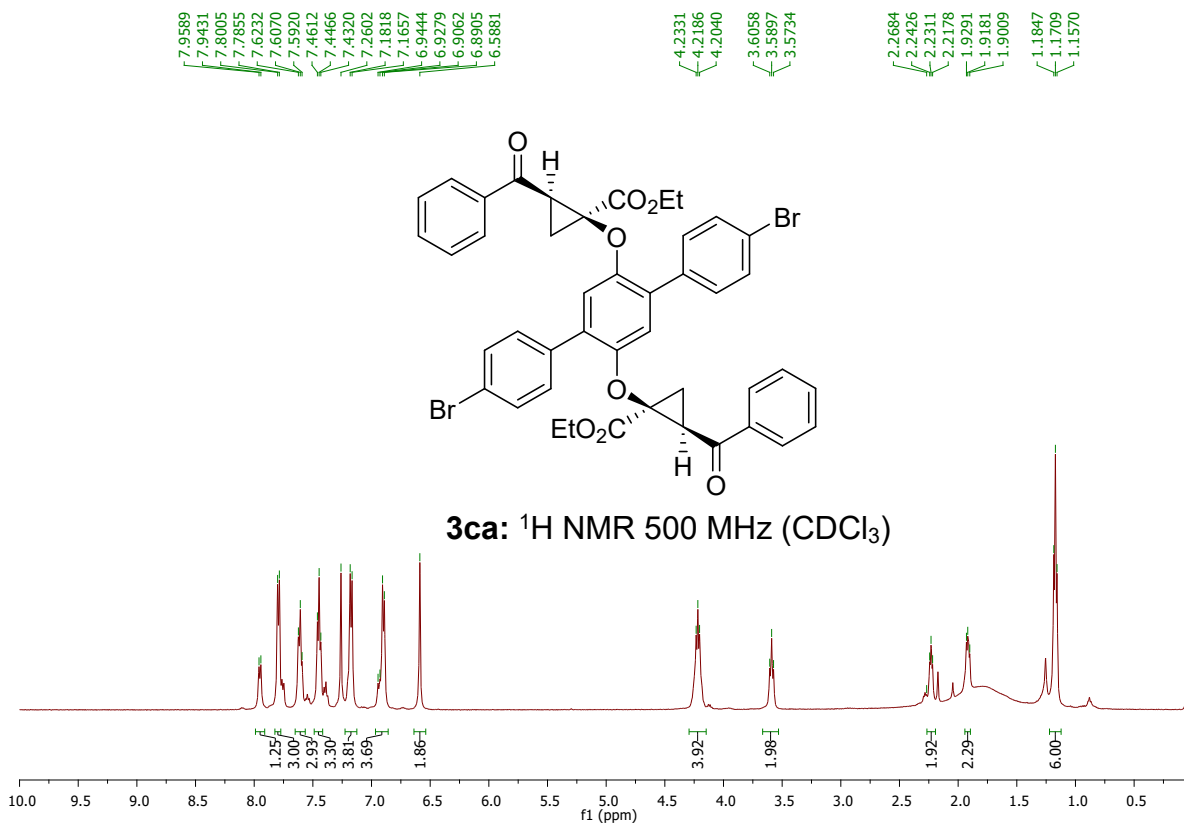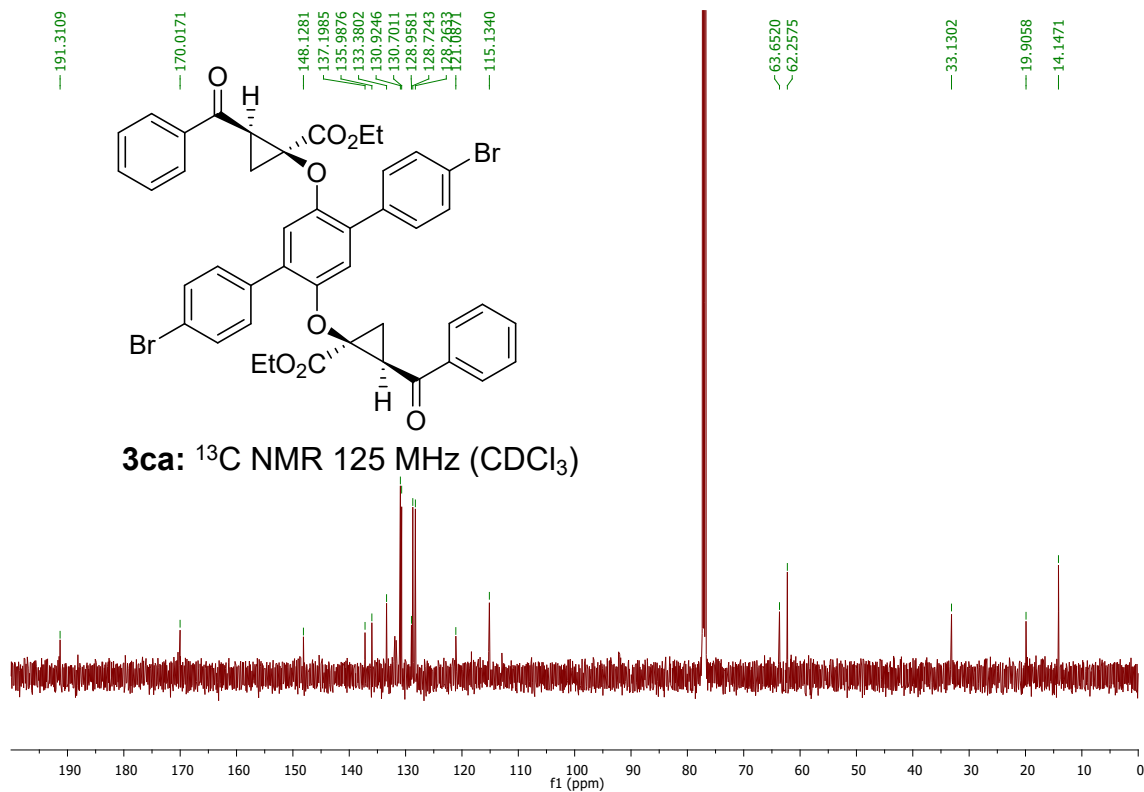



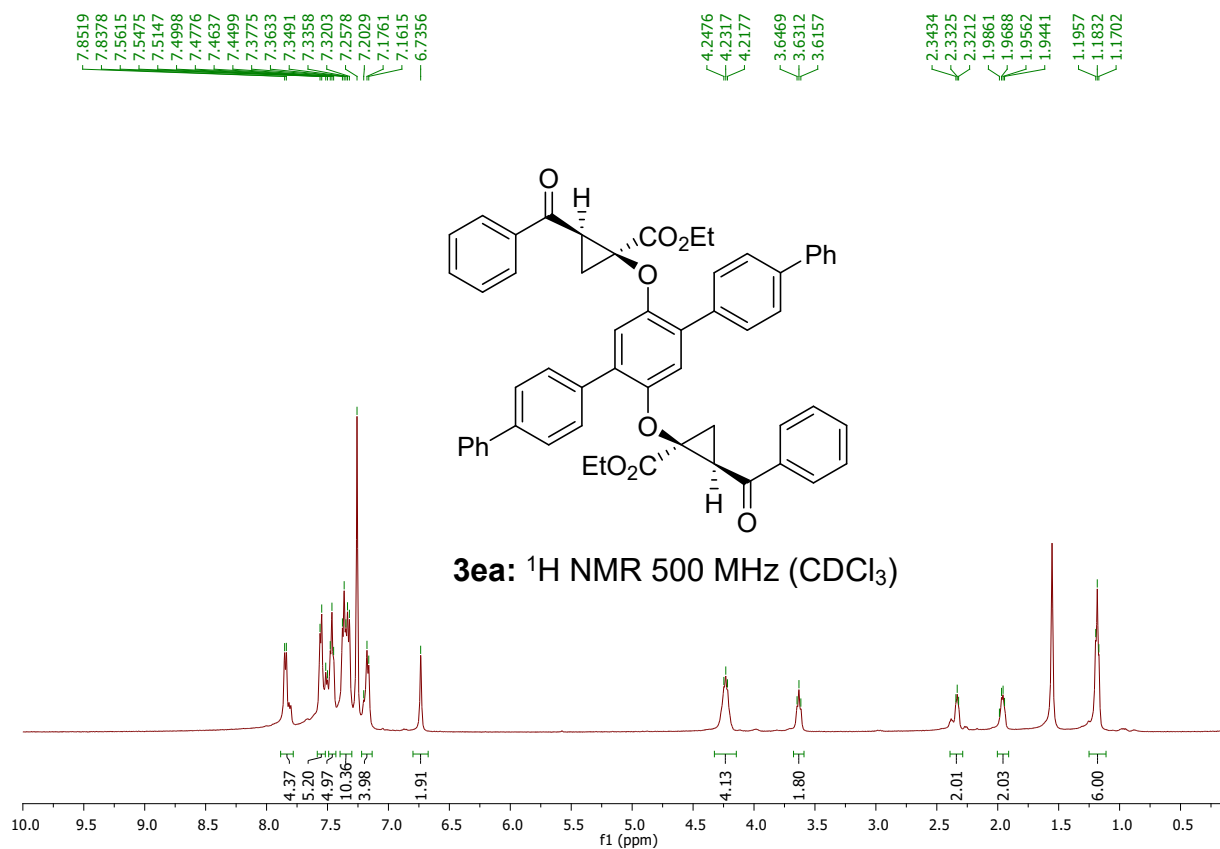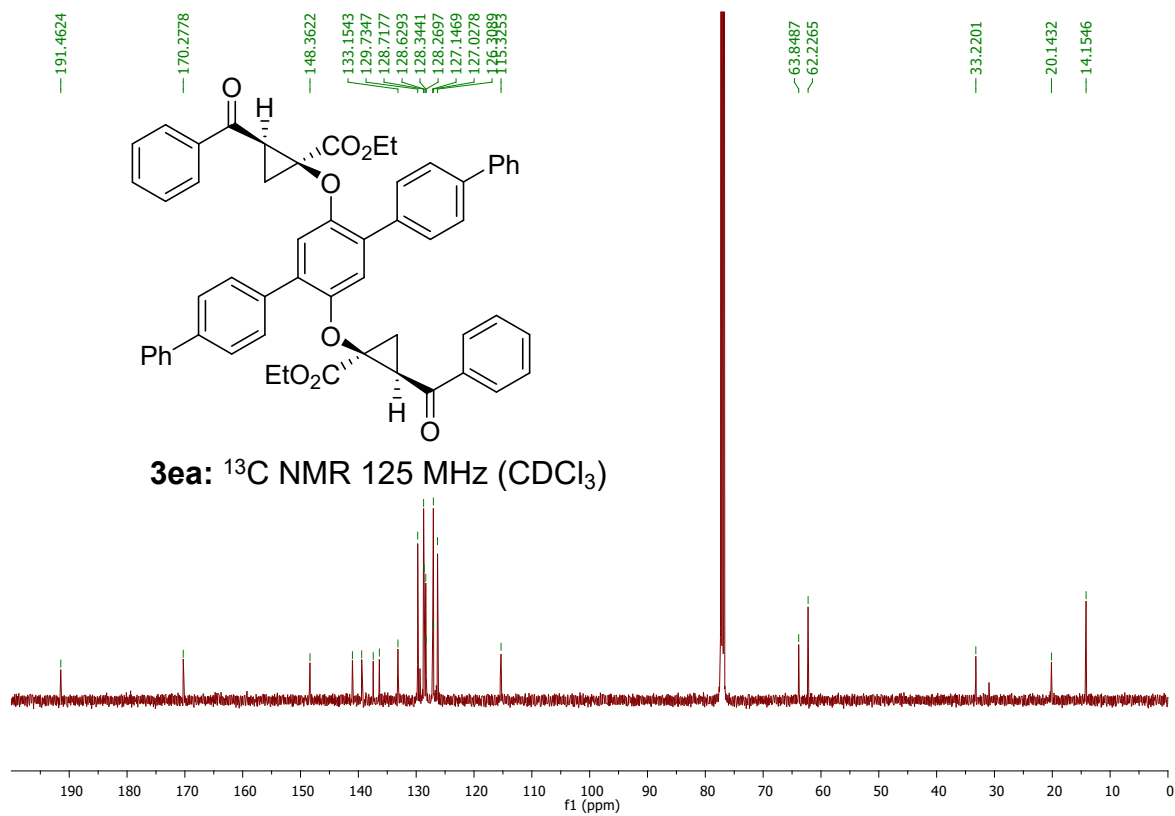

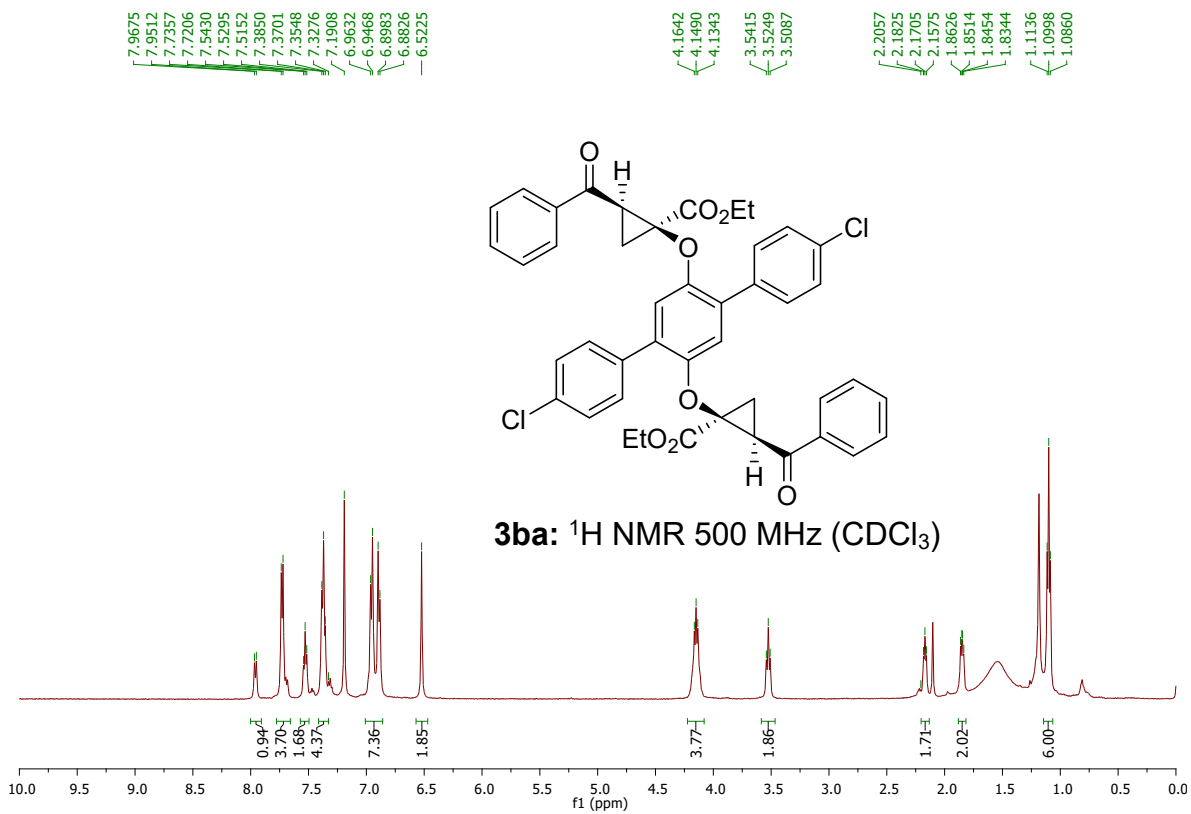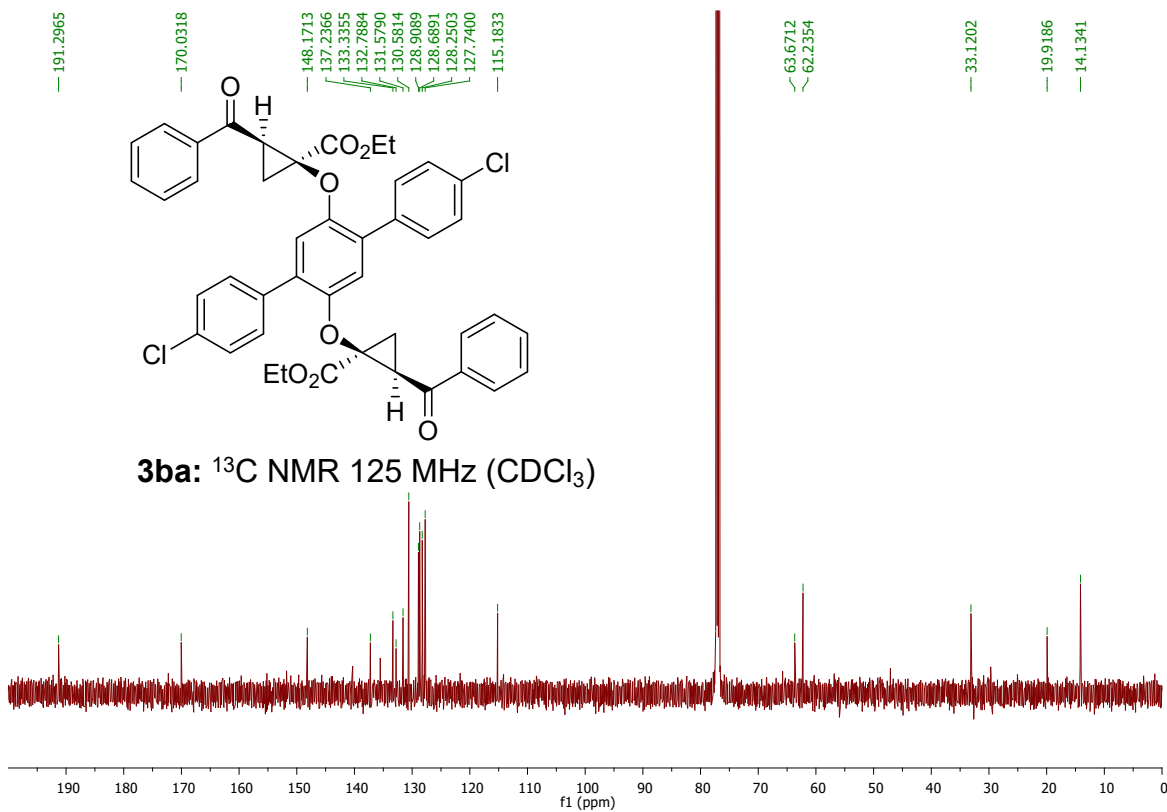

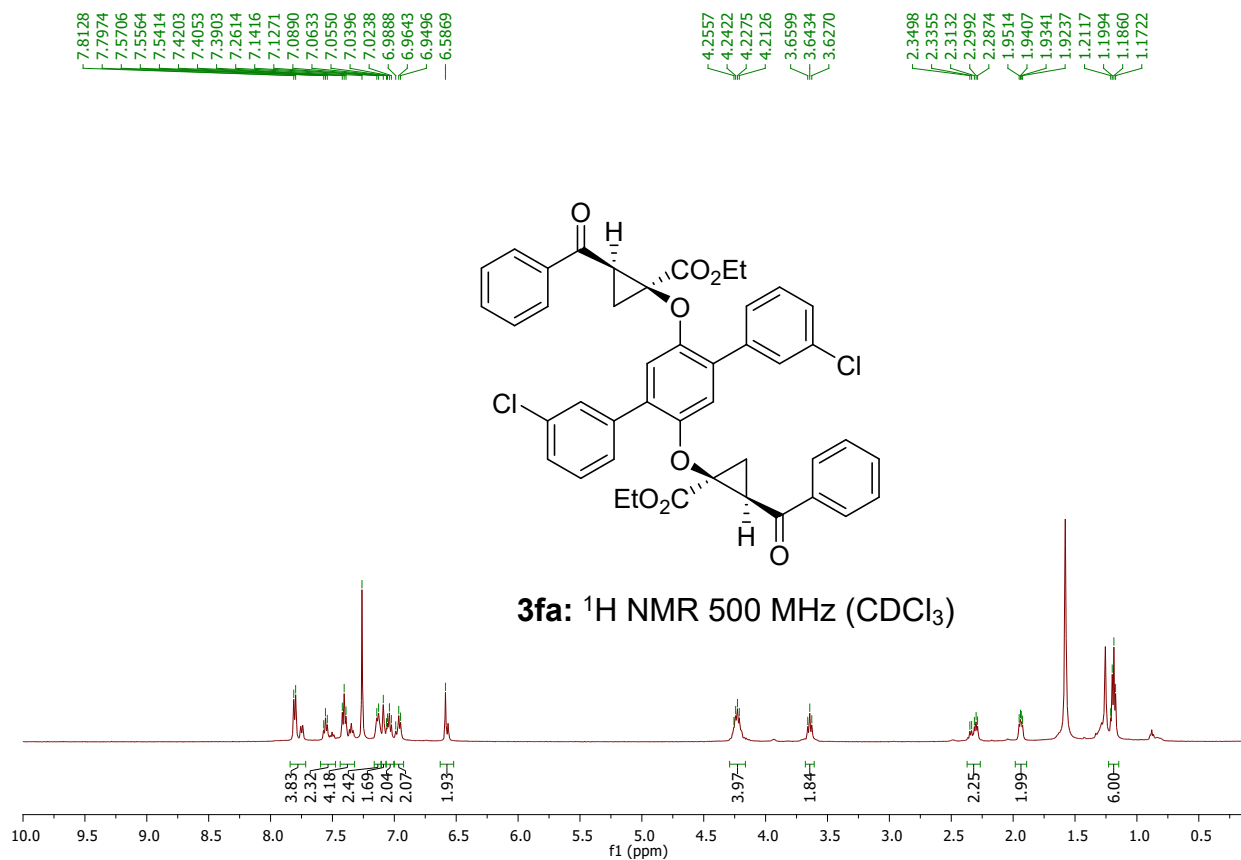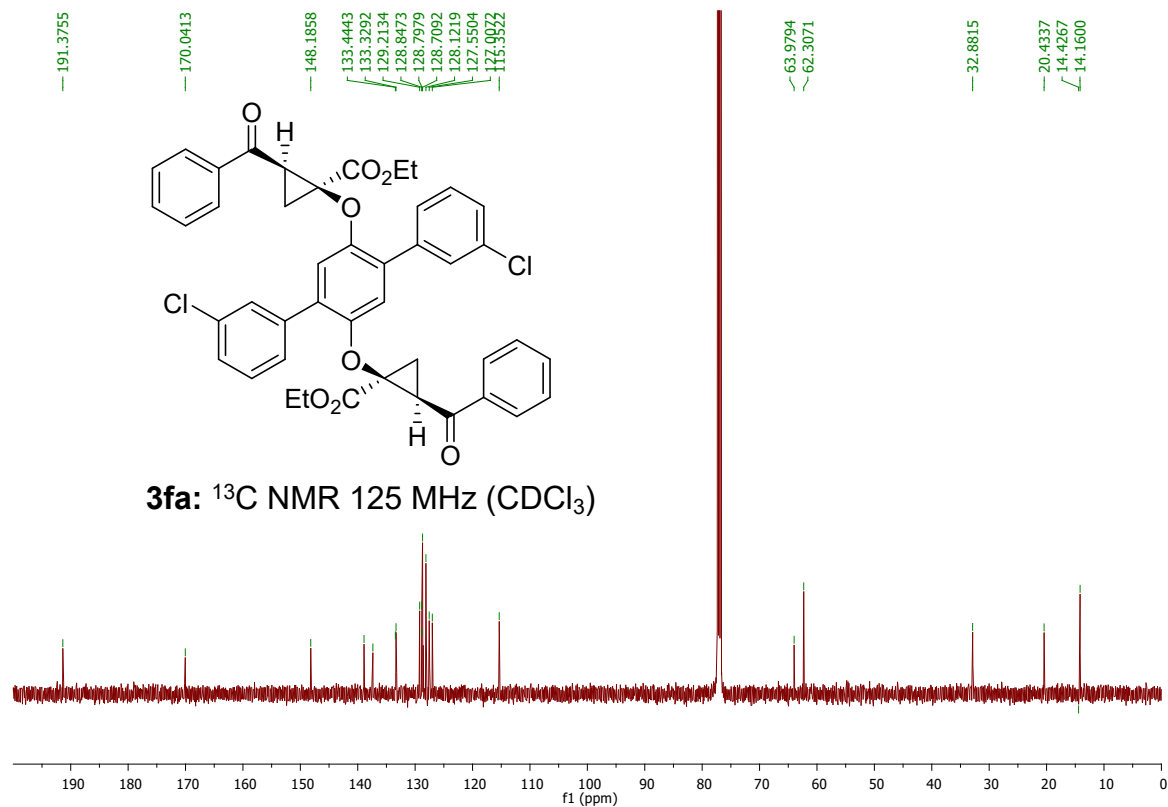

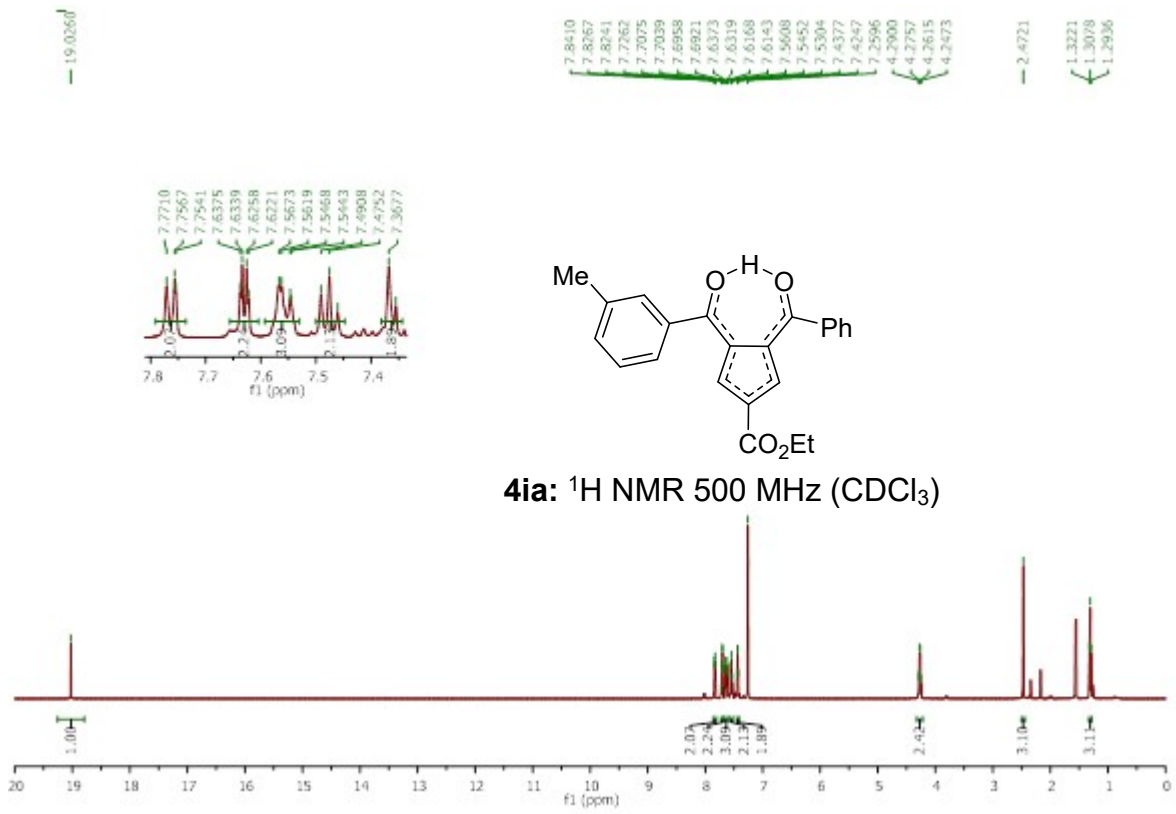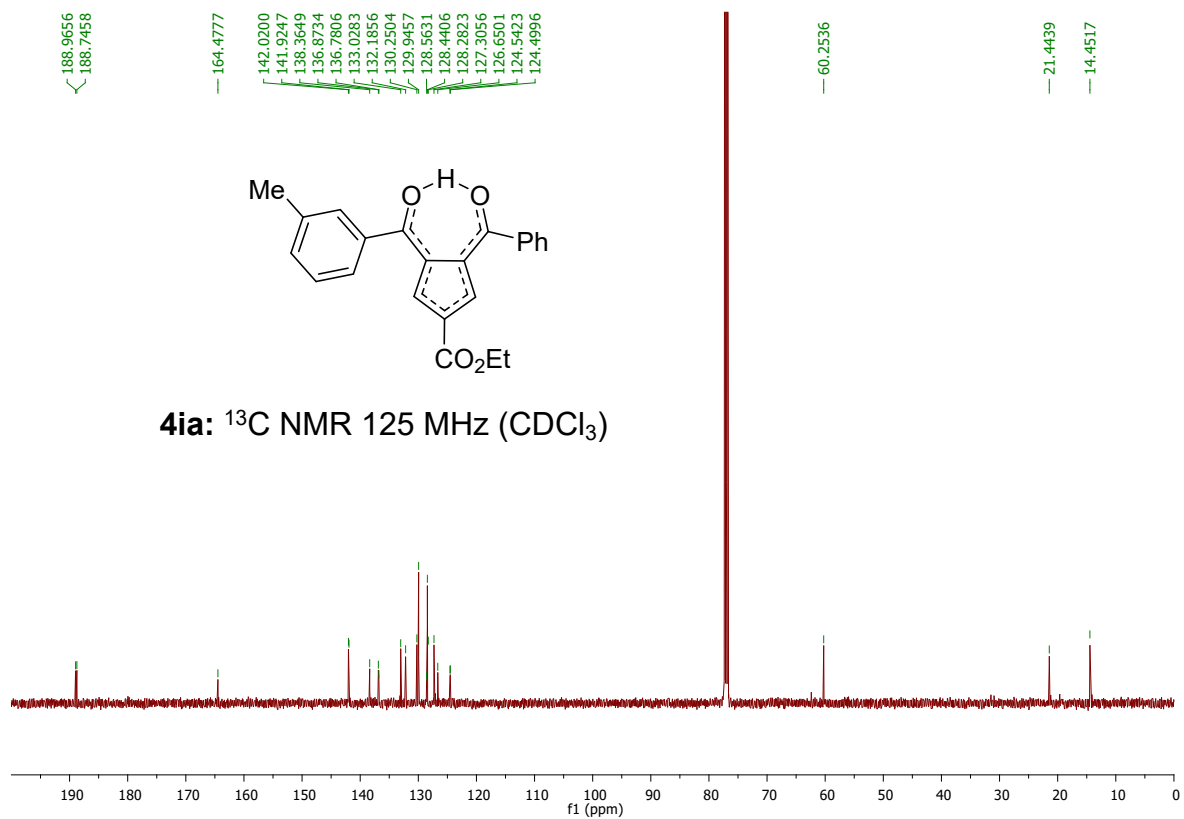

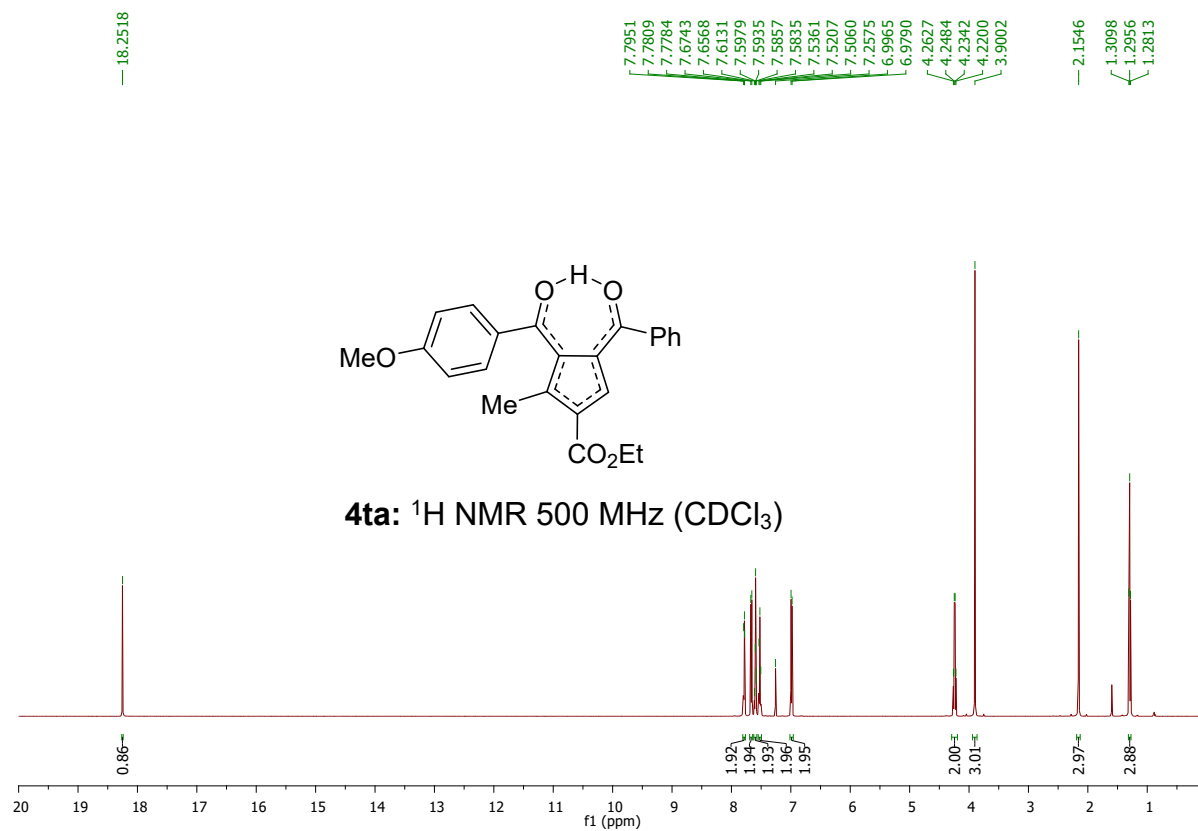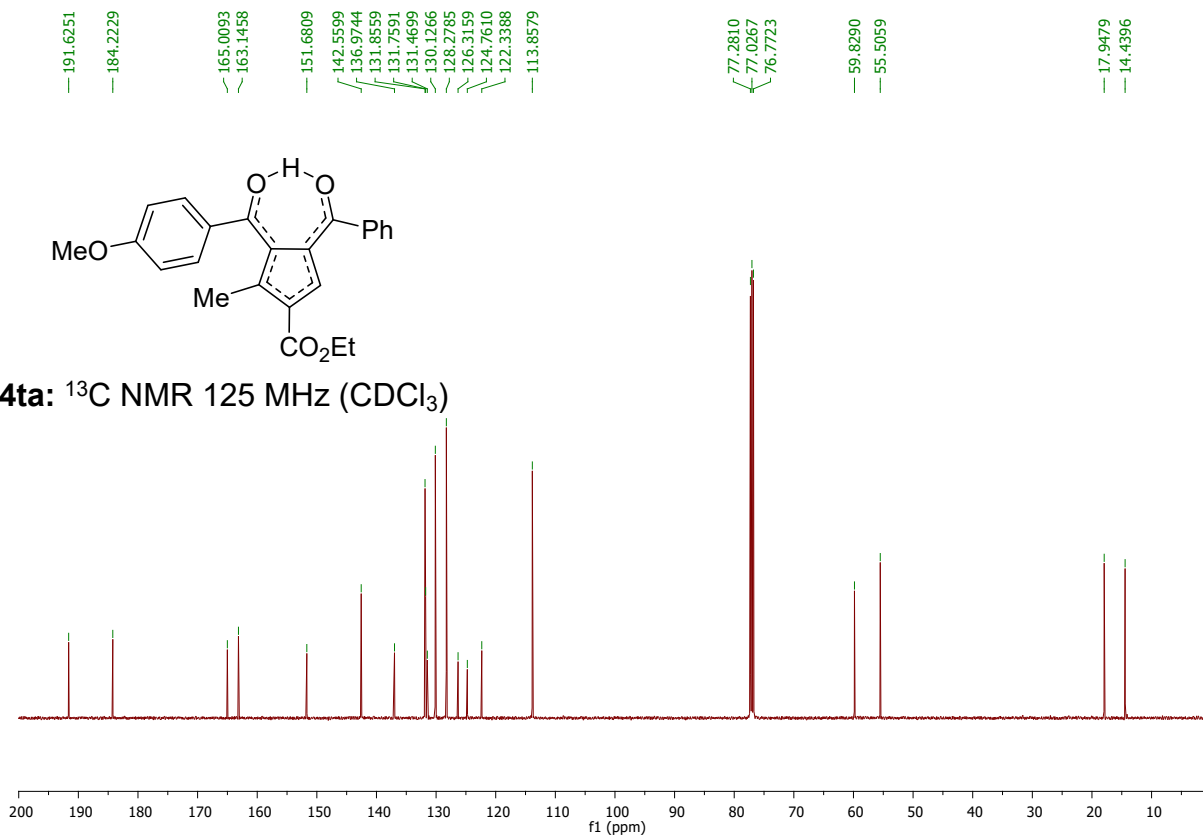

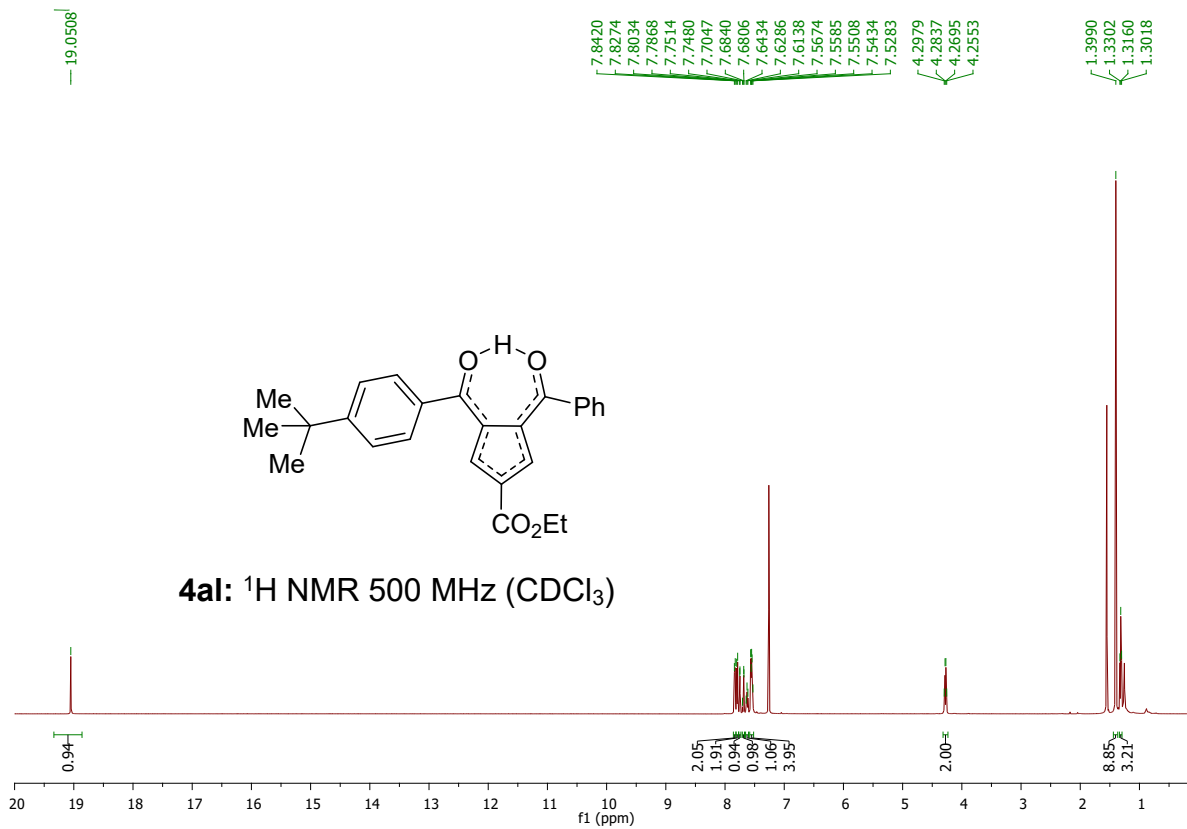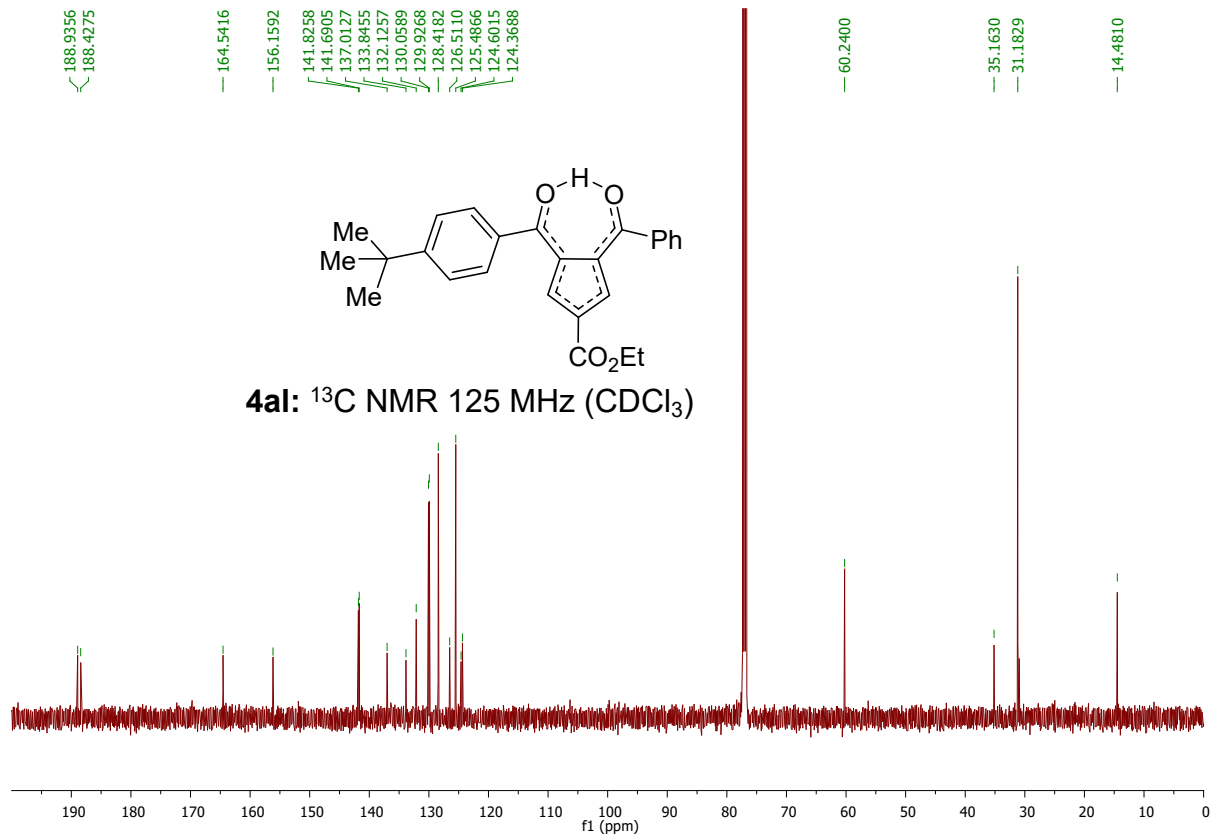

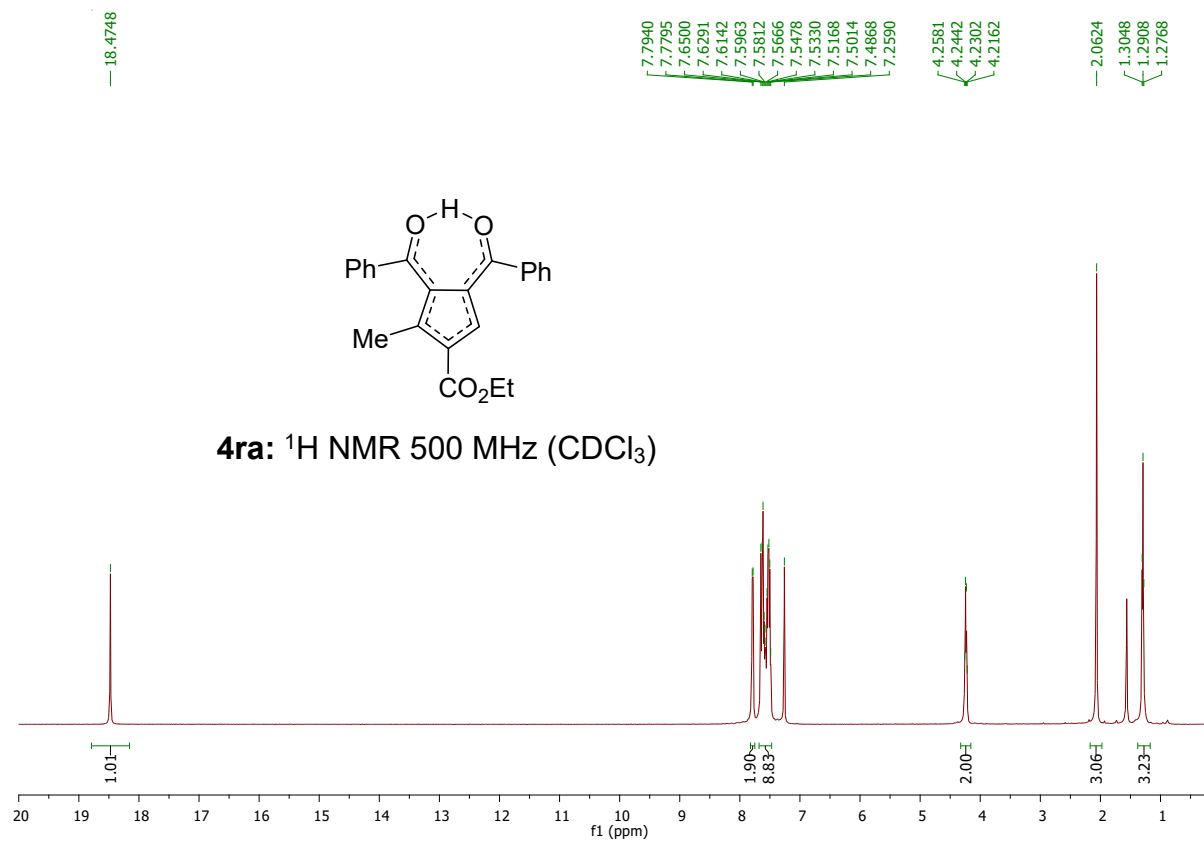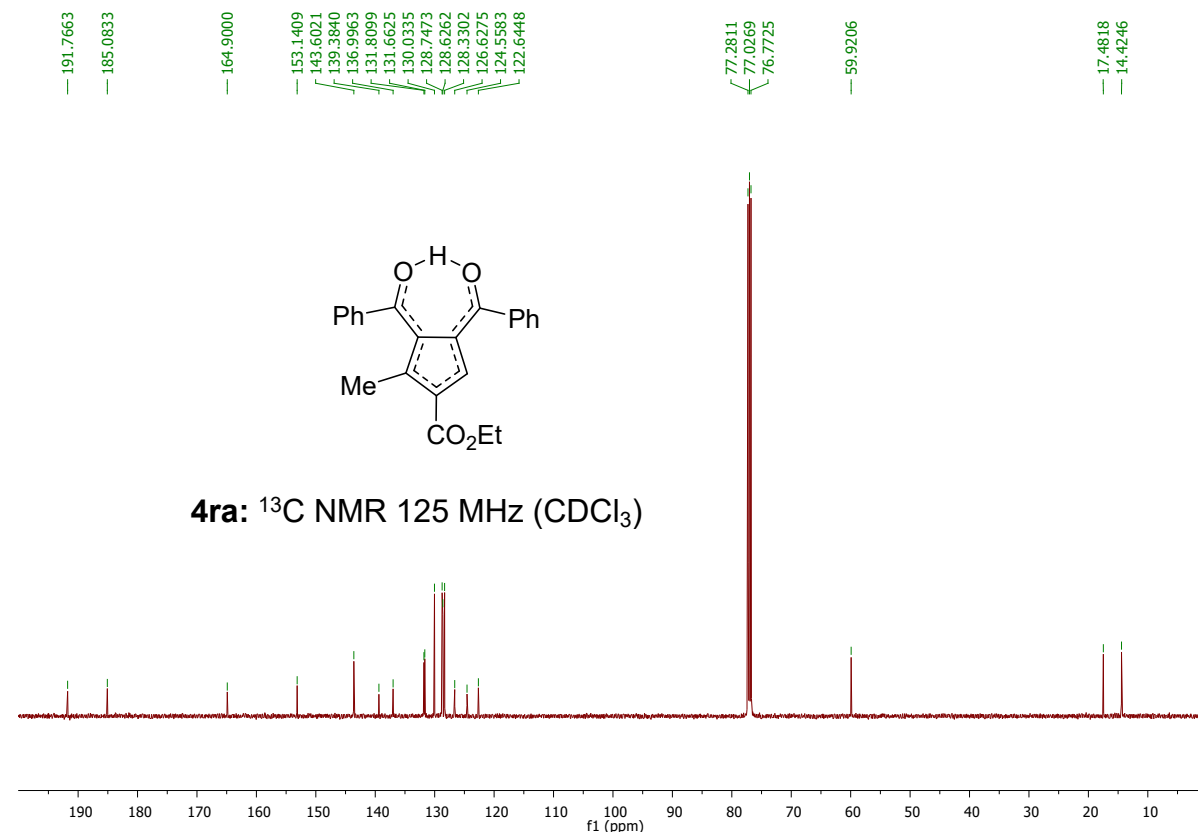

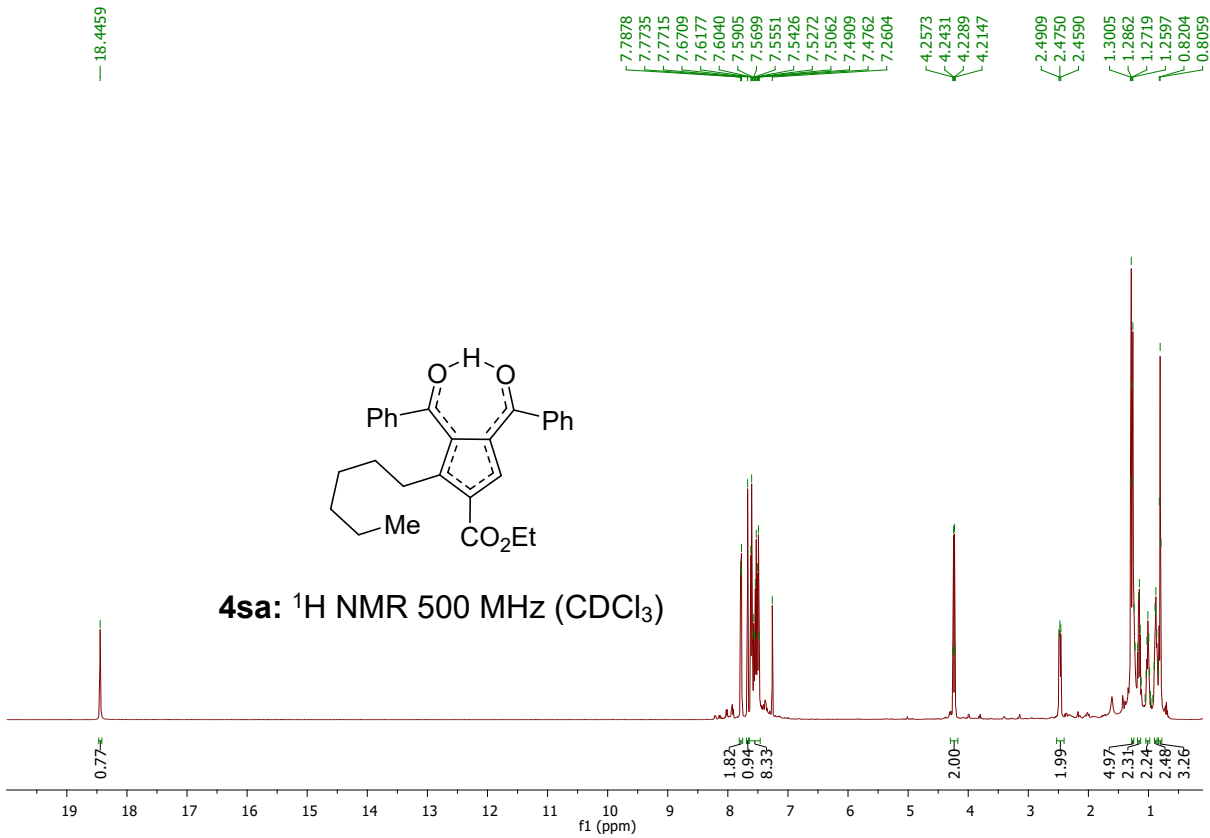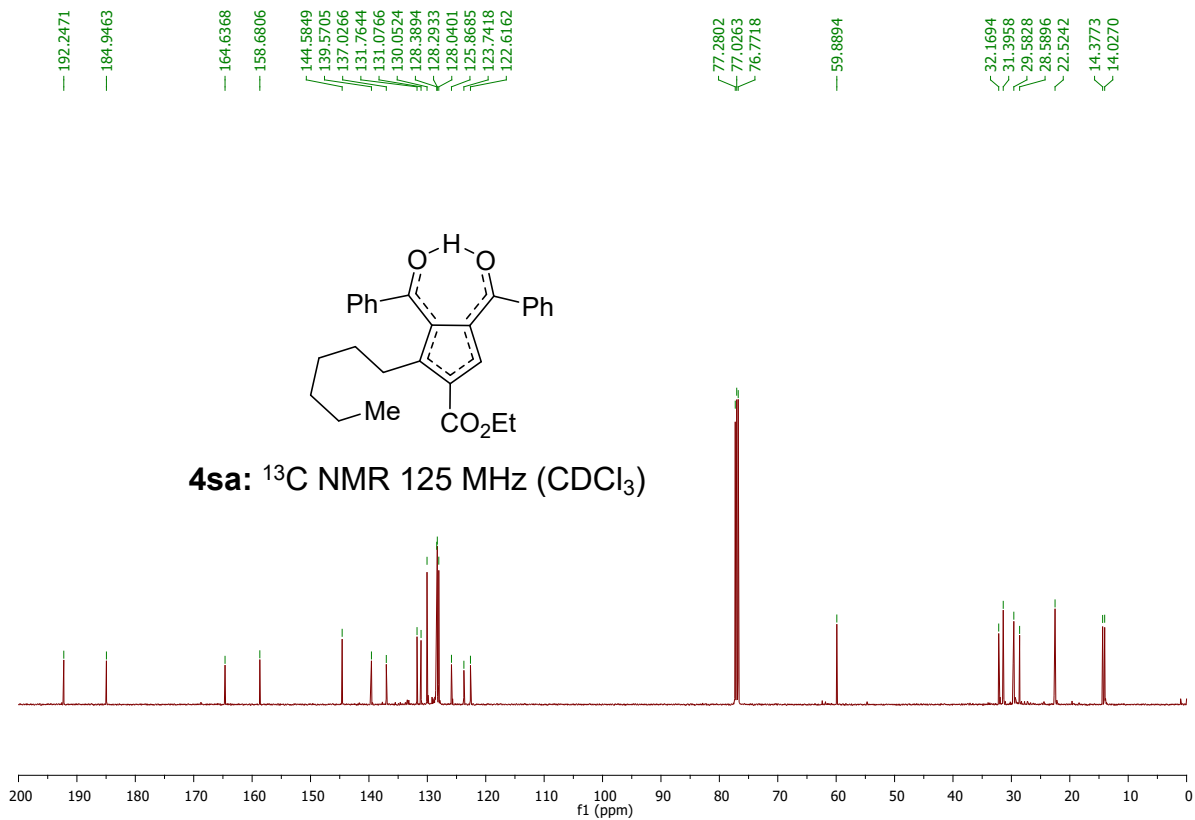



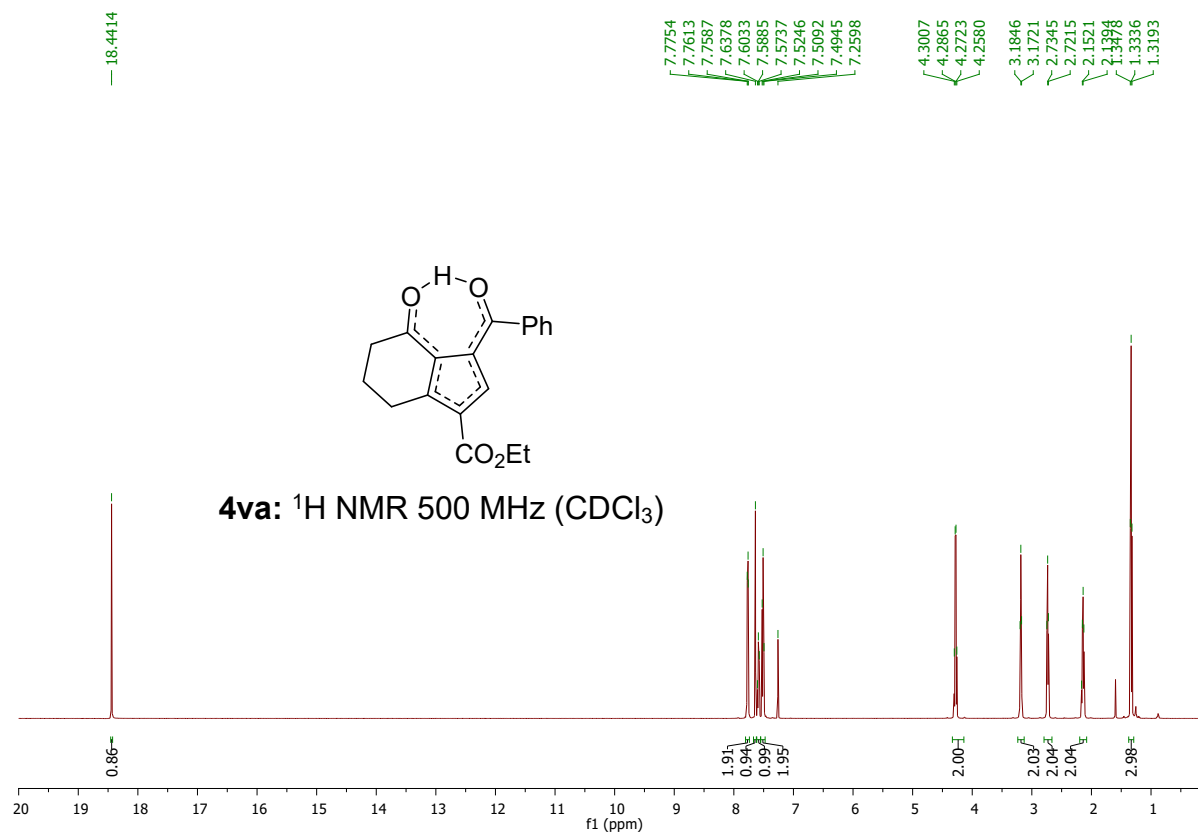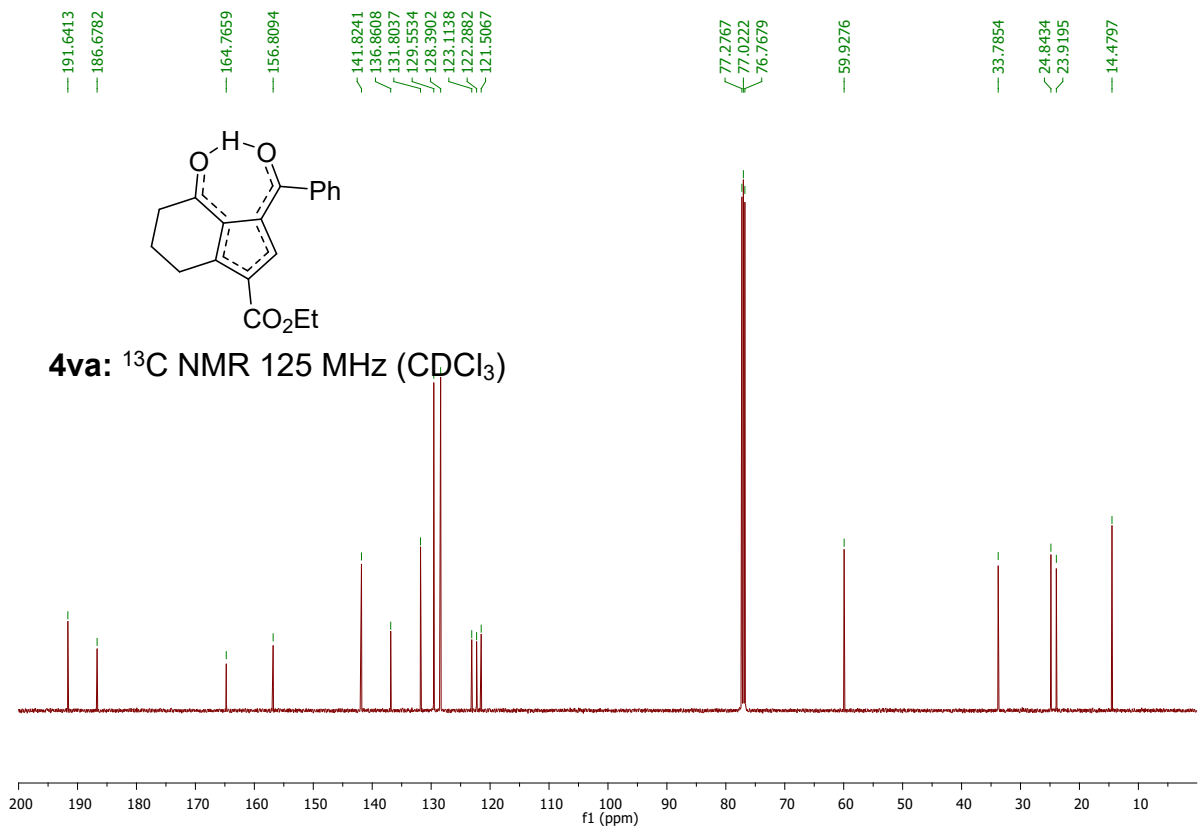

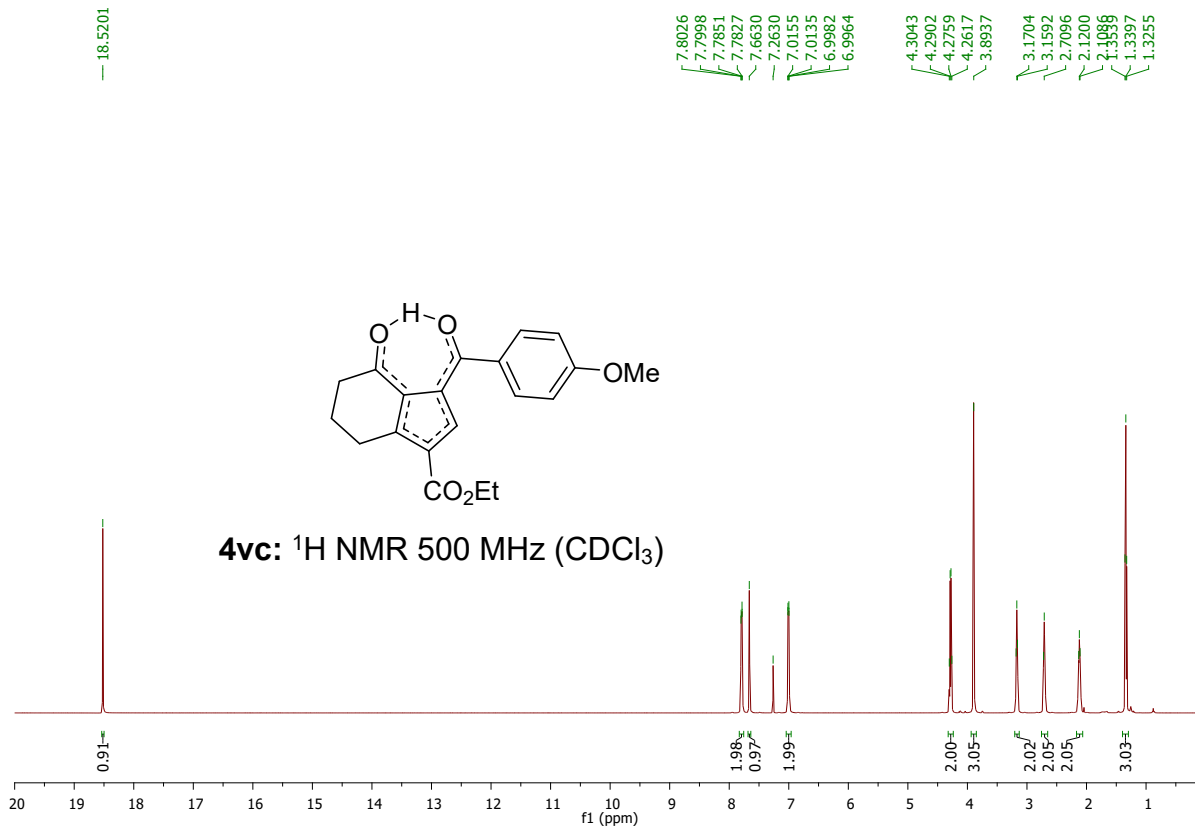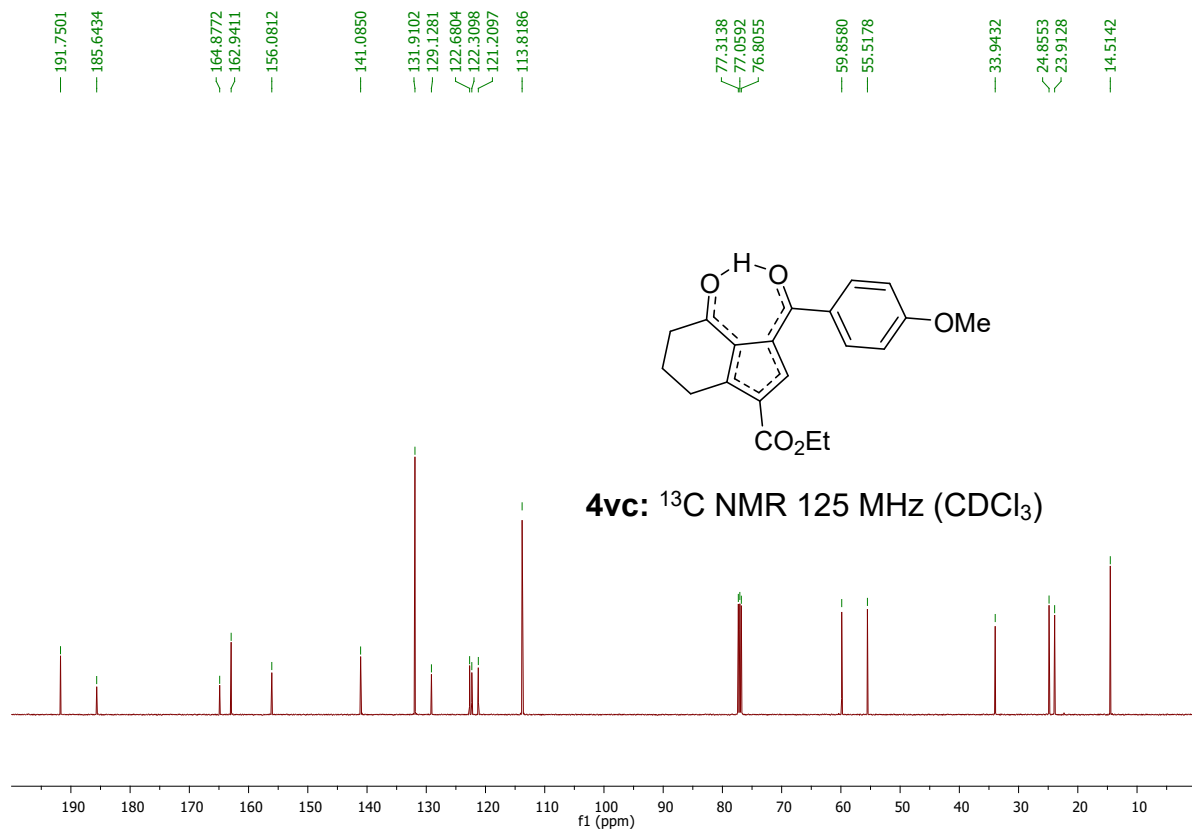

18.3397

7.6565  
7.6506  
7.6376  
7.6243  
7.6185  
7.5776  
7.2648

4.3019  
4.2877  
4.2735  
4.2592  
3.1739  
3.1614  
2.7261  
2.7132  
2.1396  
2.1268  
1.3387  
1.3245

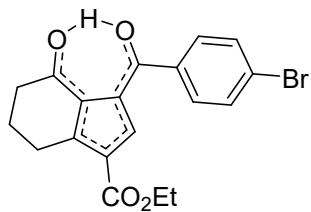

4vh: <sup>1</sup>H NMR 500 MHz (CDCl<sub>3</sub>)

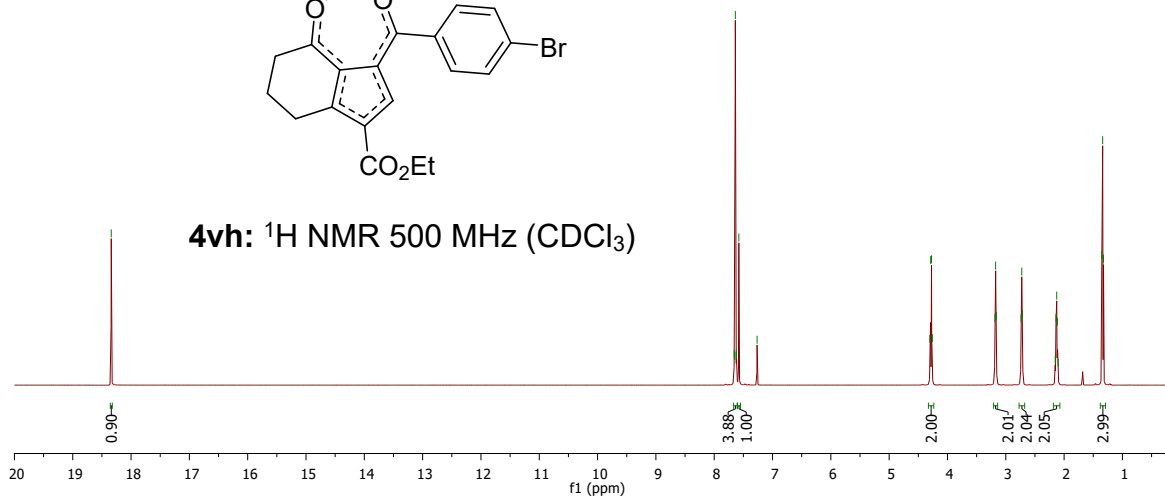

191.4853

185.4363

164.5794

157.1905

141.4285

135.7417

131.6711

130.9976

126.6278

123.3107

122.1552

121.4542

77.3004

77.0468

76.7928

59.9820

33.6165

24.8091

23.8501

14.4788

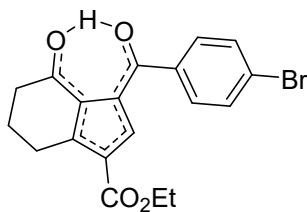

4vh: <sup>13</sup>C NMR 125 MHz (CDCl<sub>3</sub>)

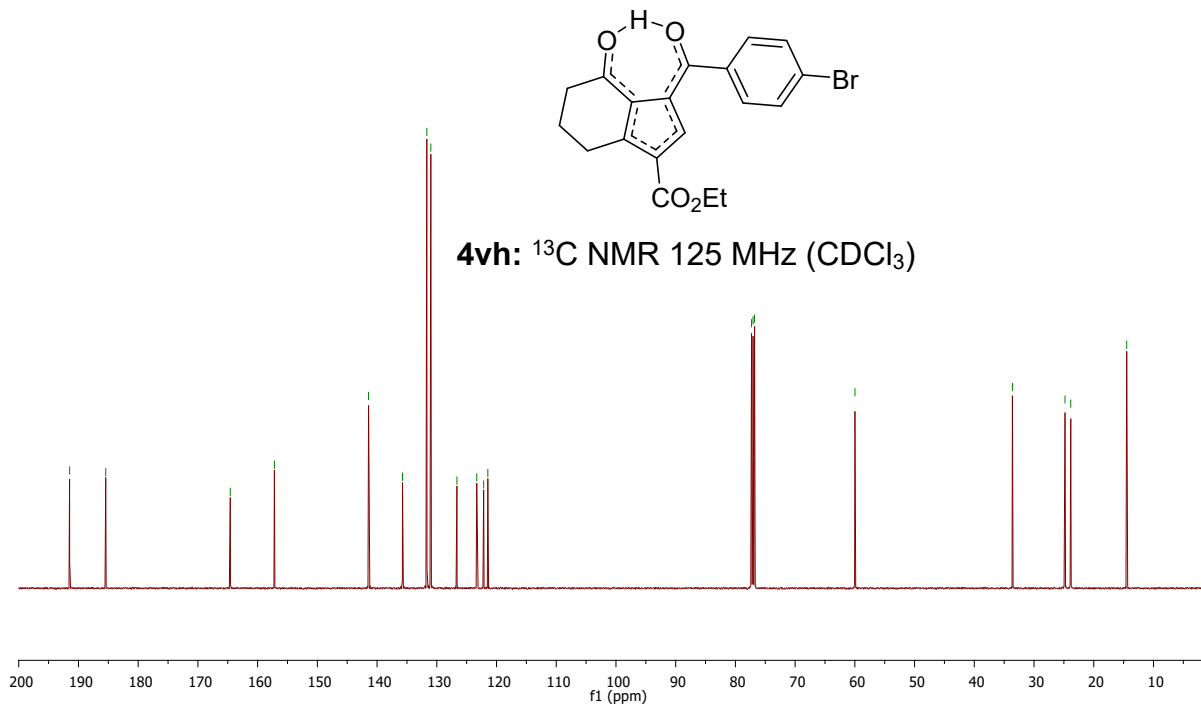

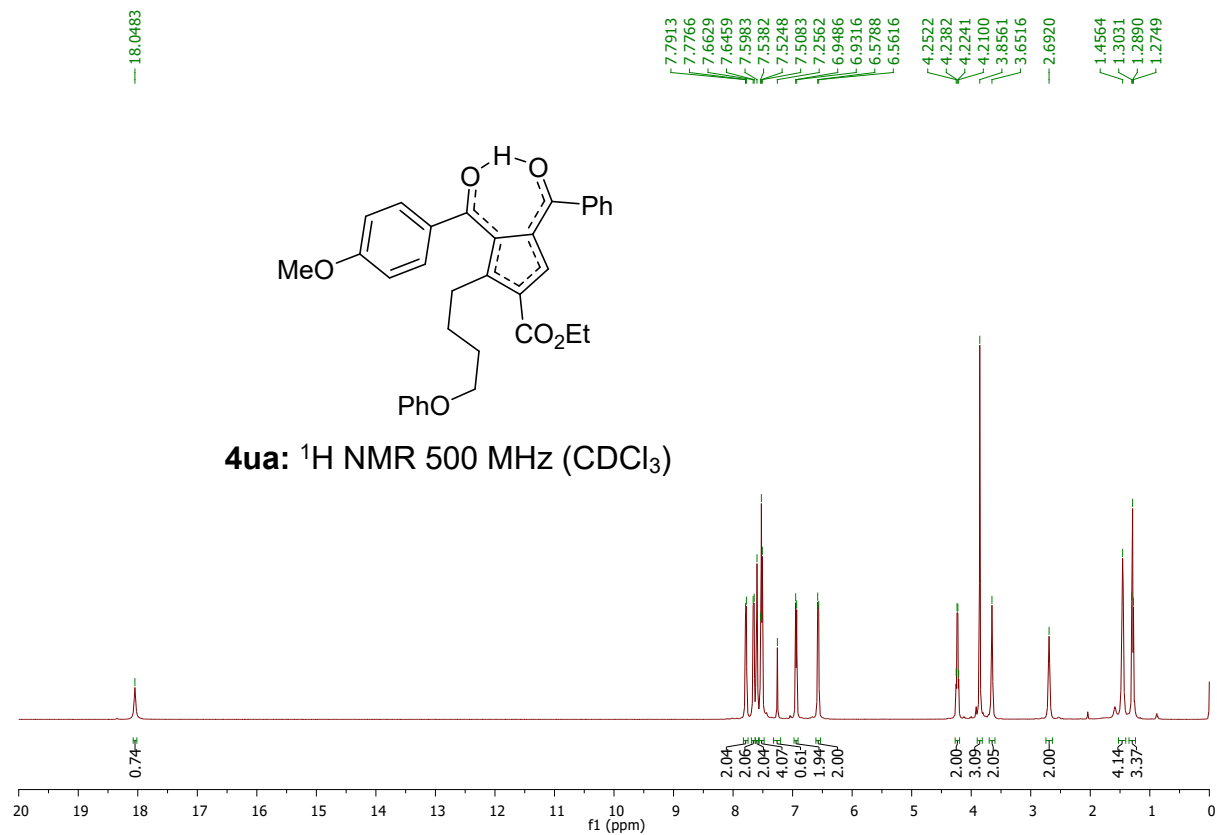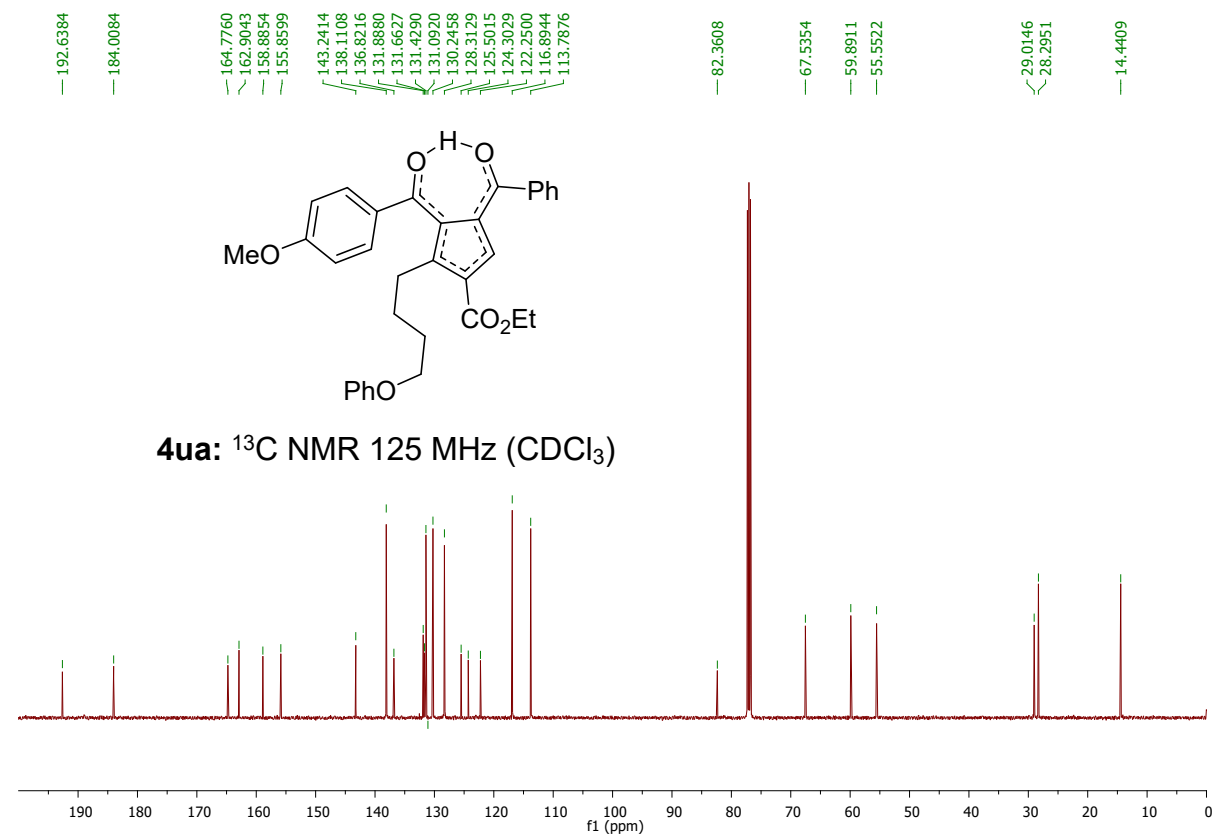

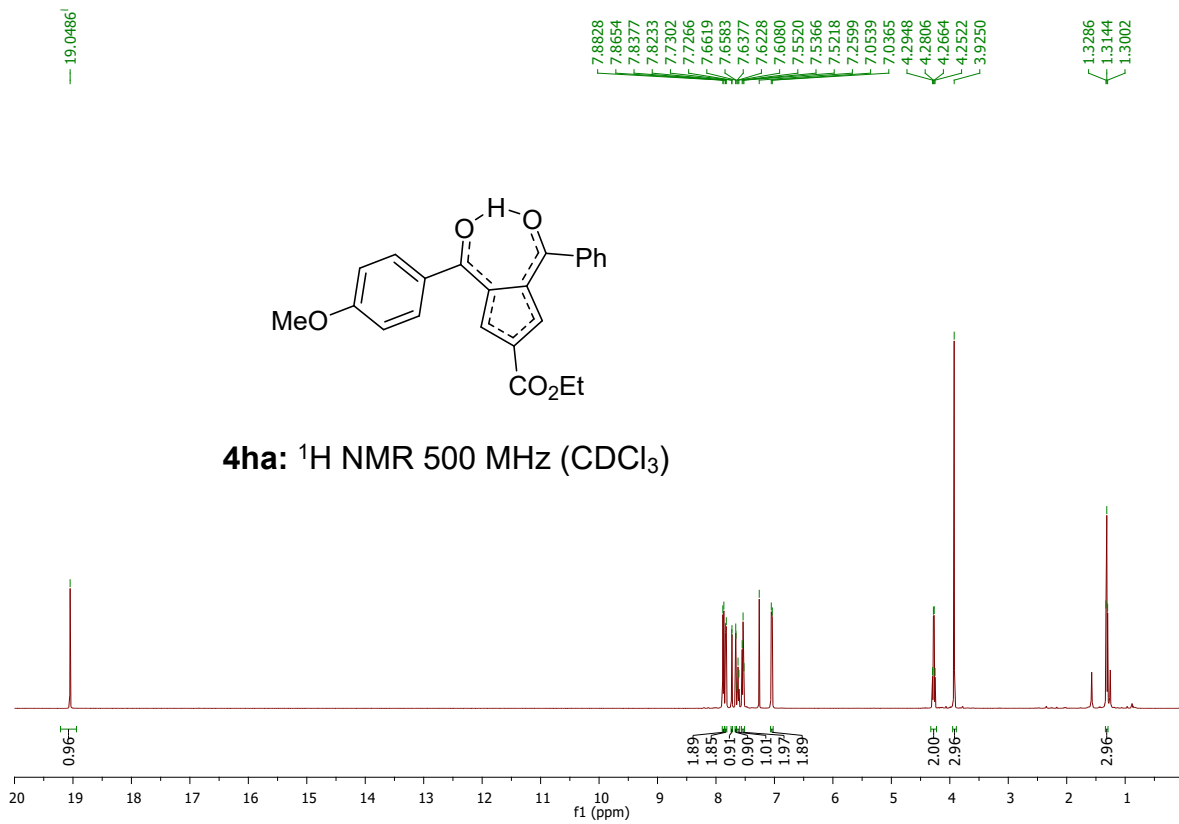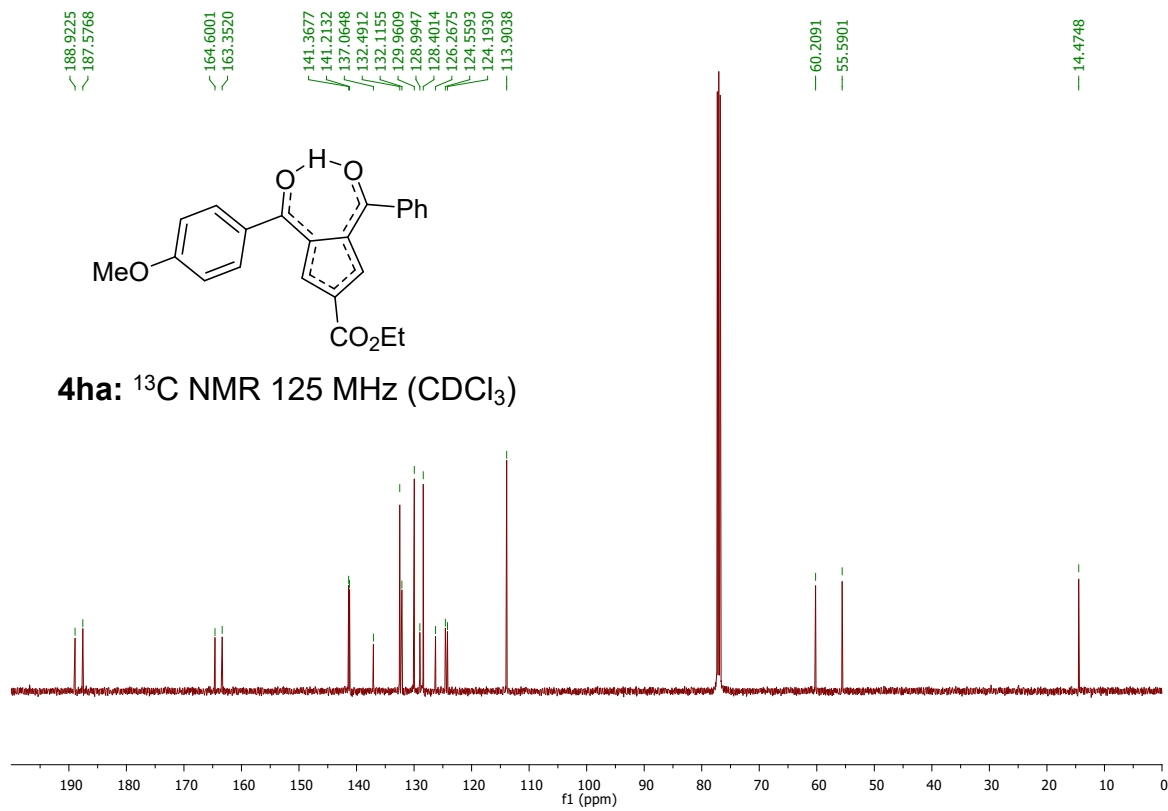

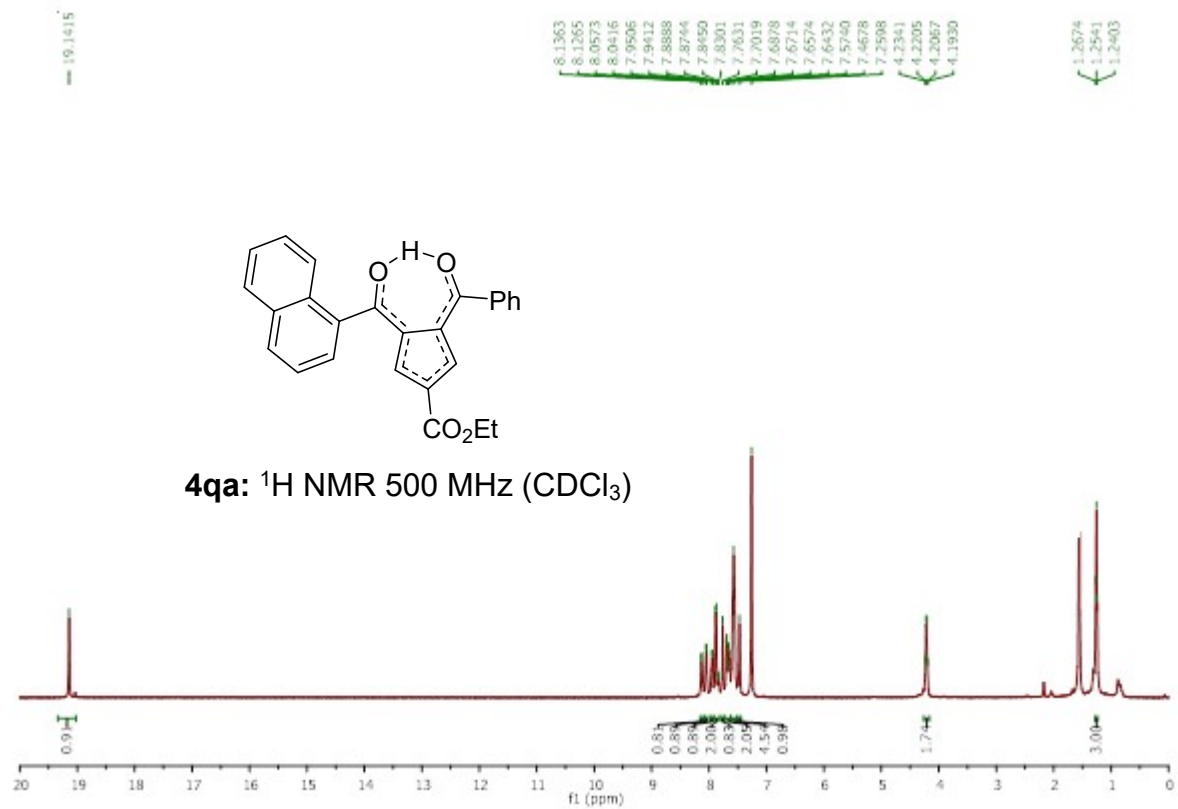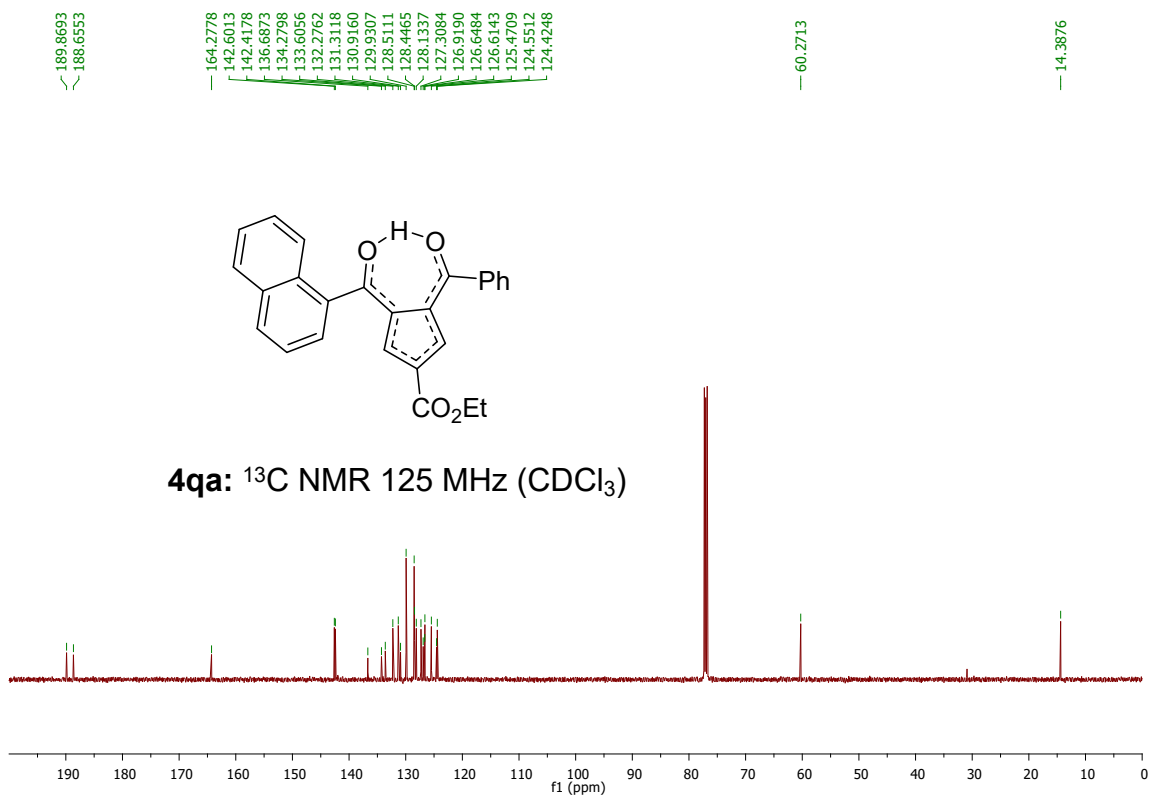

SS-M83-135

19.2288

8.2181  
8.2118  
8.2009  
8.0819  
8.0655  
7.9789  
7.9683  
7.9608  
7.7584  
7.7448  
7.6255  
7.6097  
7.6003  
7.5935  
7.5851  
7.5727  
7.5246  
7.2602  
4.1839  
4.1697  
4.1556  
4.1415

1.2178  
1.2036  
1.1895

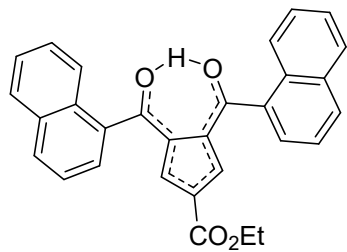

4qi: <sup>1</sup>H NMR 500 MHz (CDCl<sub>3</sub>)

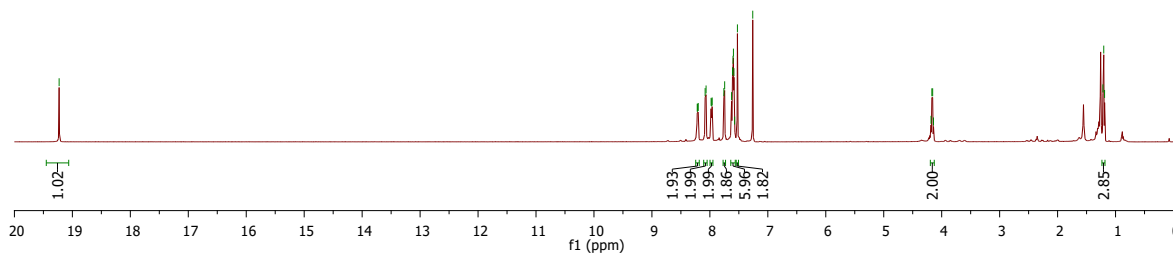

189.8141

164.1222

143.0119  
134.0670  
133.6420  
131.4269  
130.9082  
128.4914  
128.2645  
127.3703  
127.0210  
126.9840  
126.6723  
125.4952  
124.4567

60.2688

14.3302

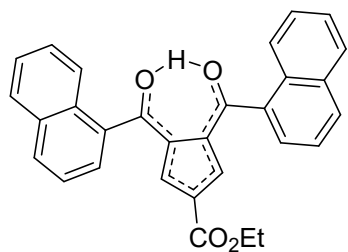

4qi: <sup>13</sup>C NMR 125 MHz (CDCl<sub>3</sub>)

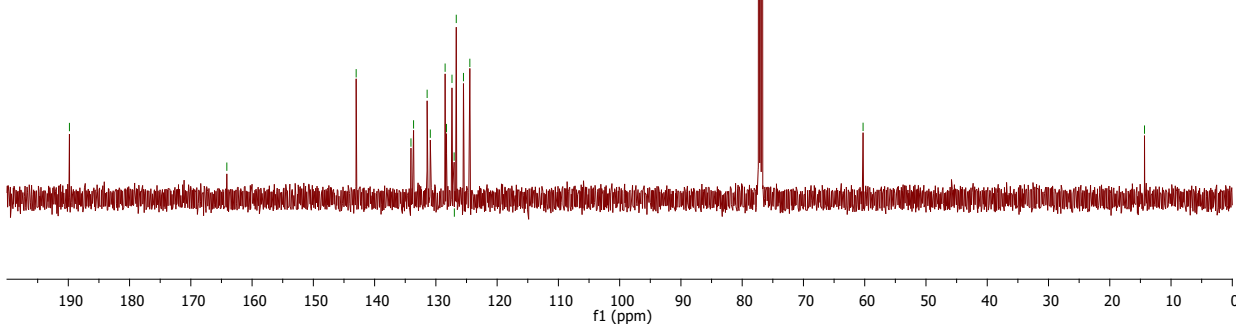

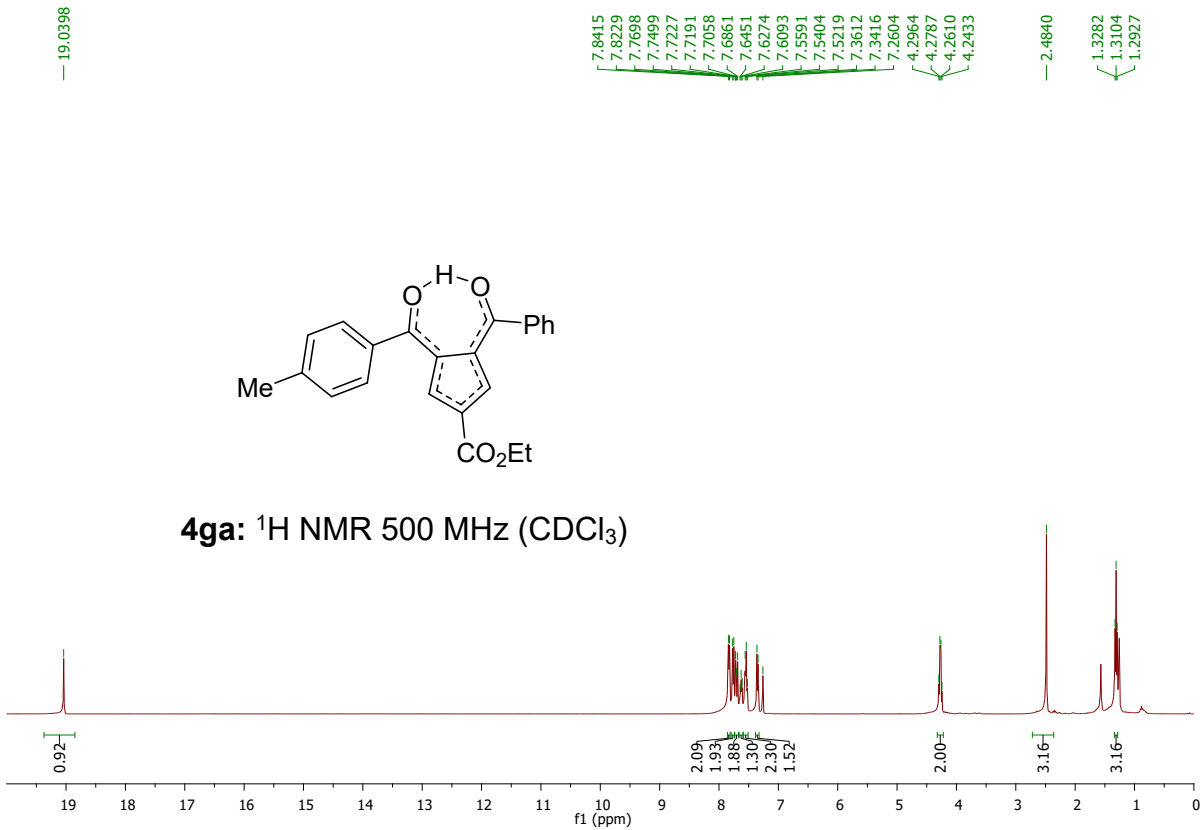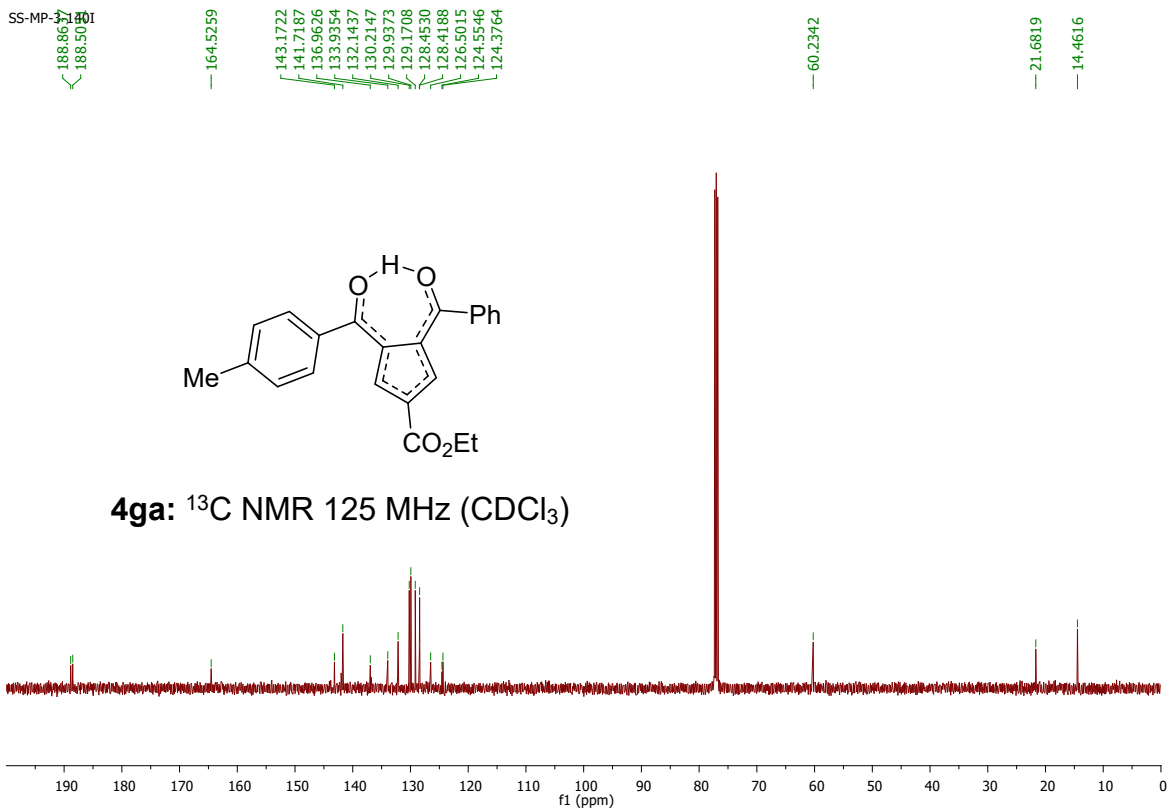



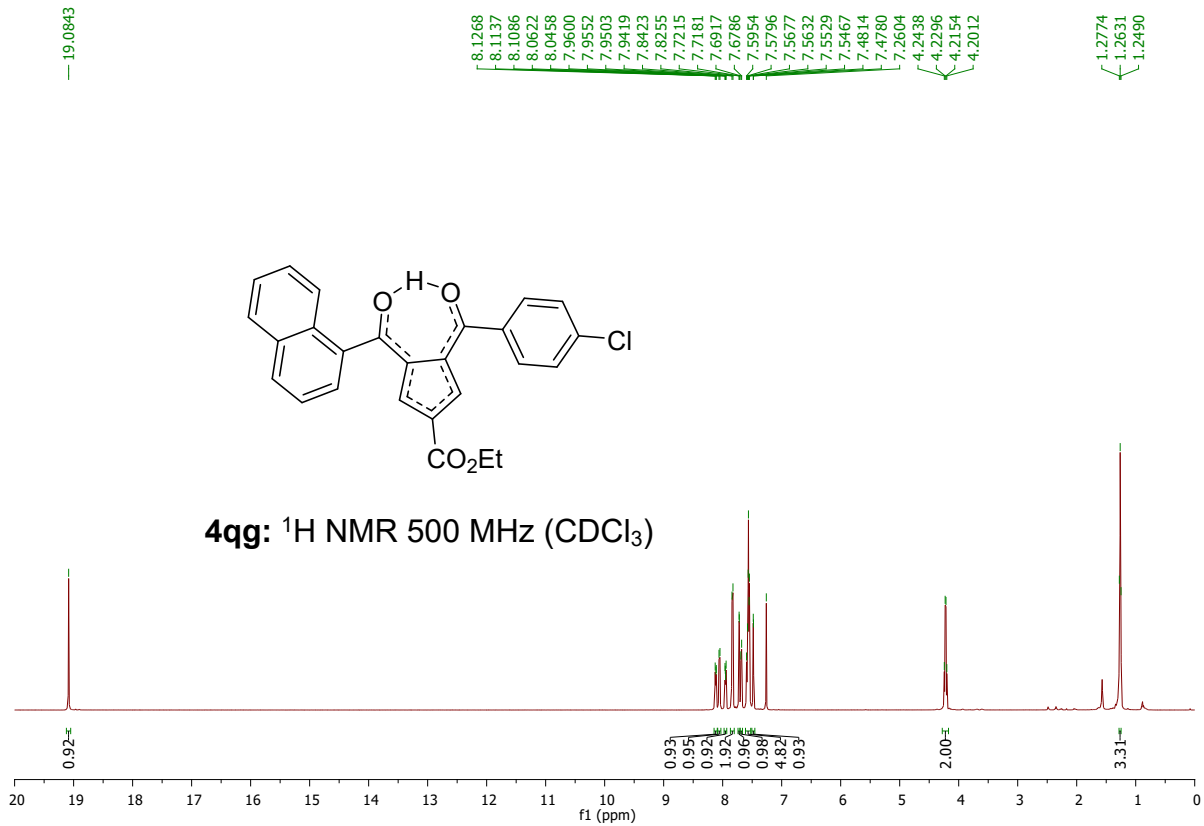

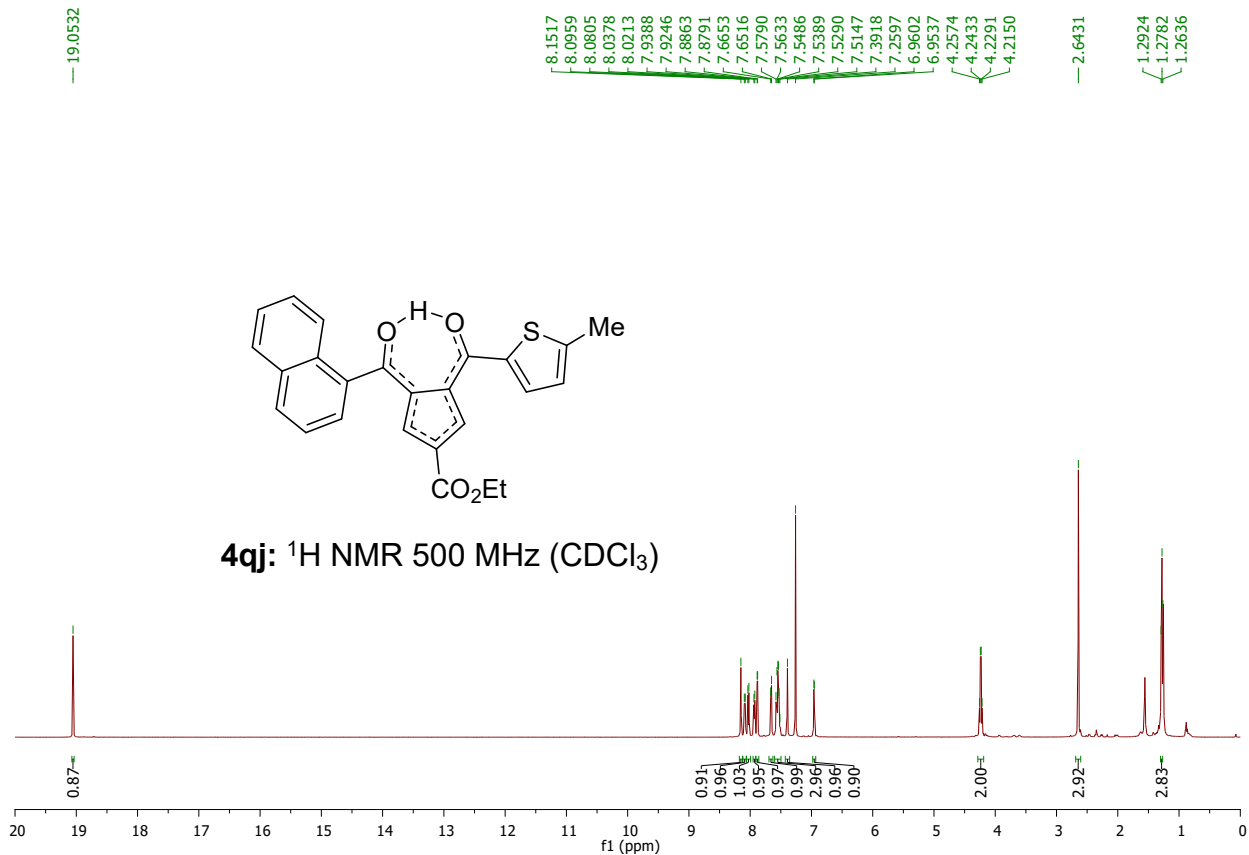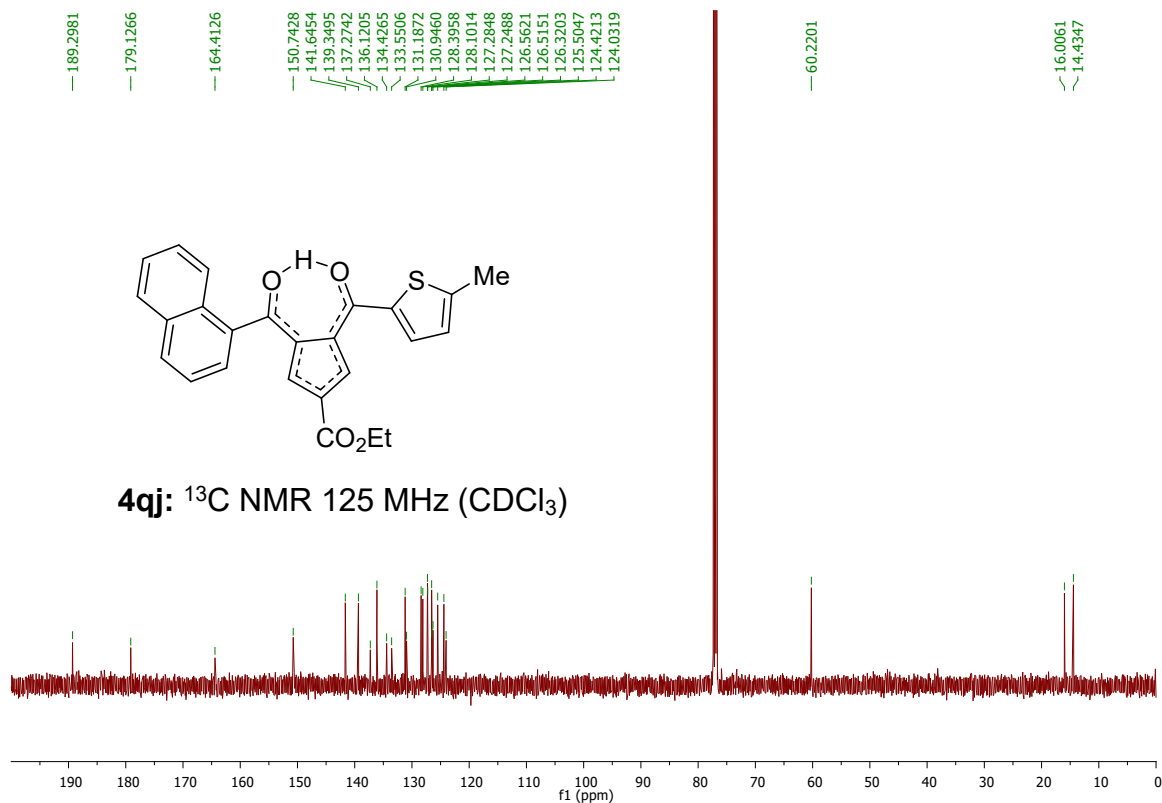

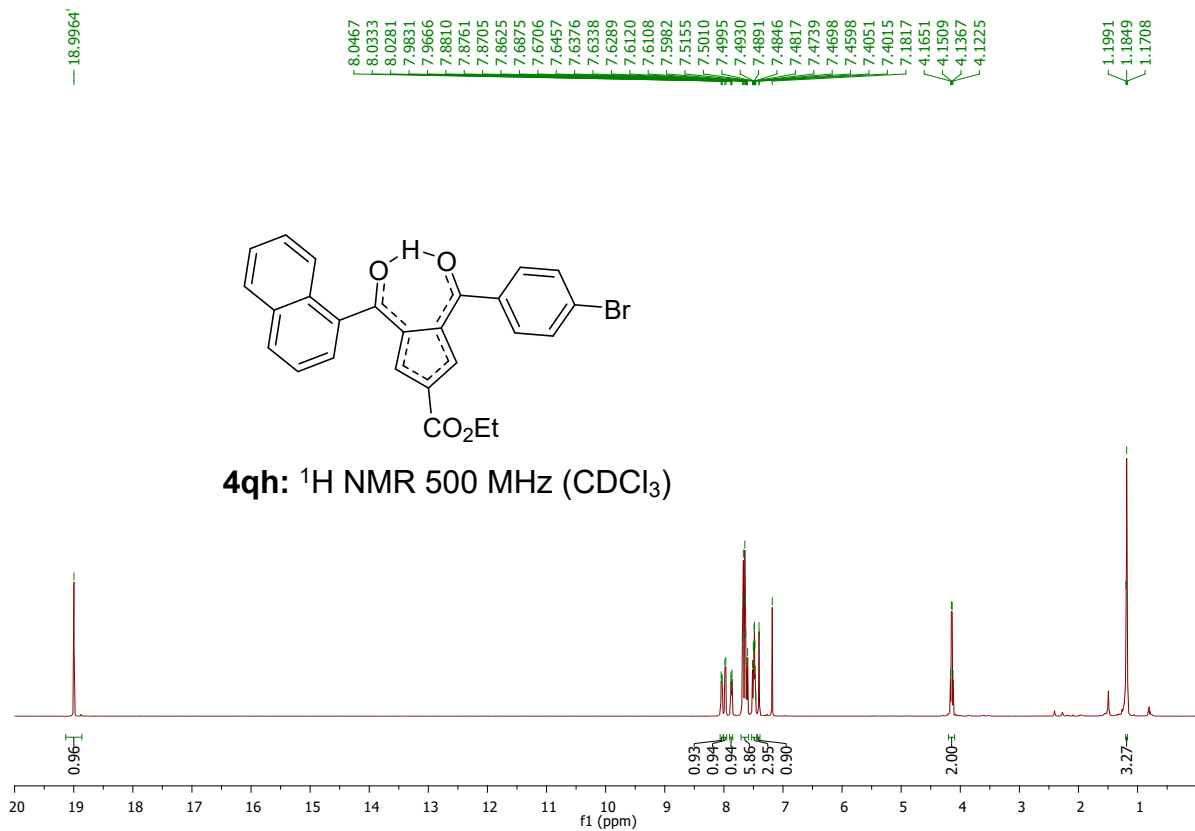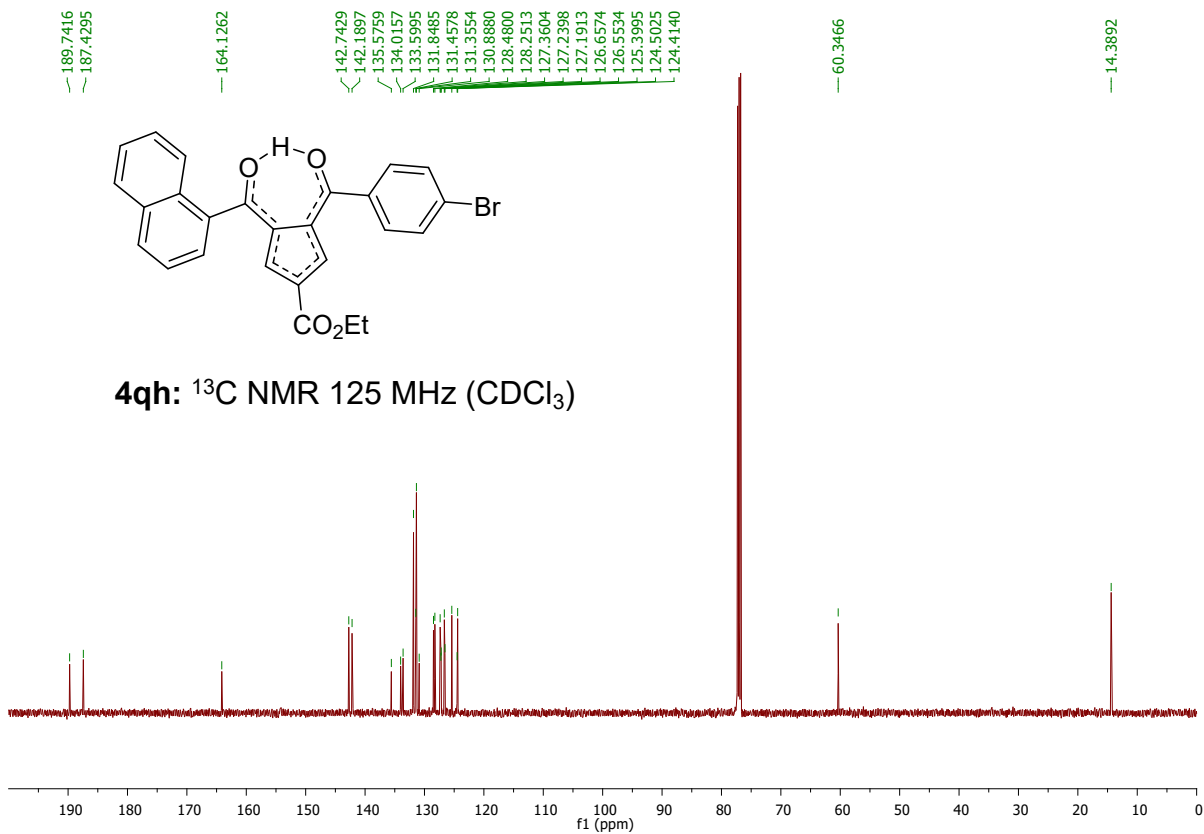

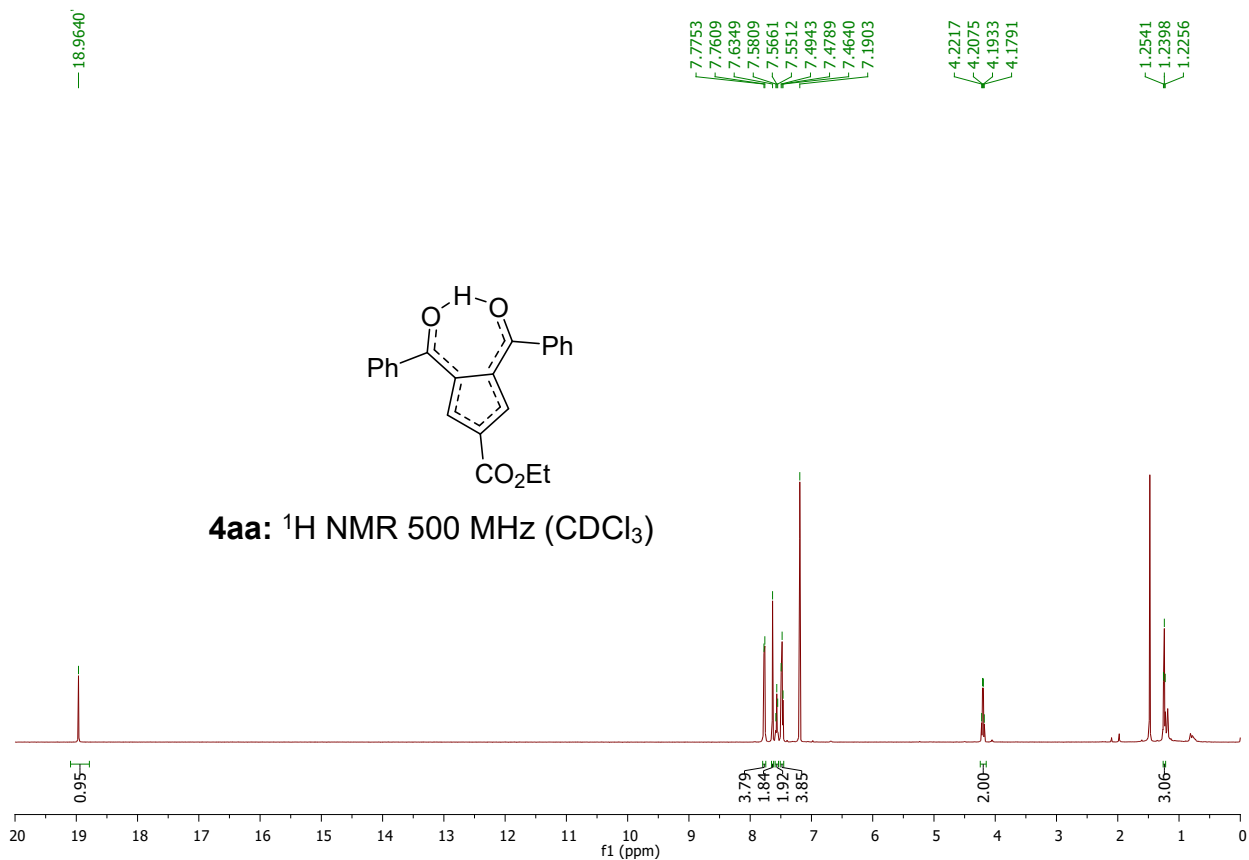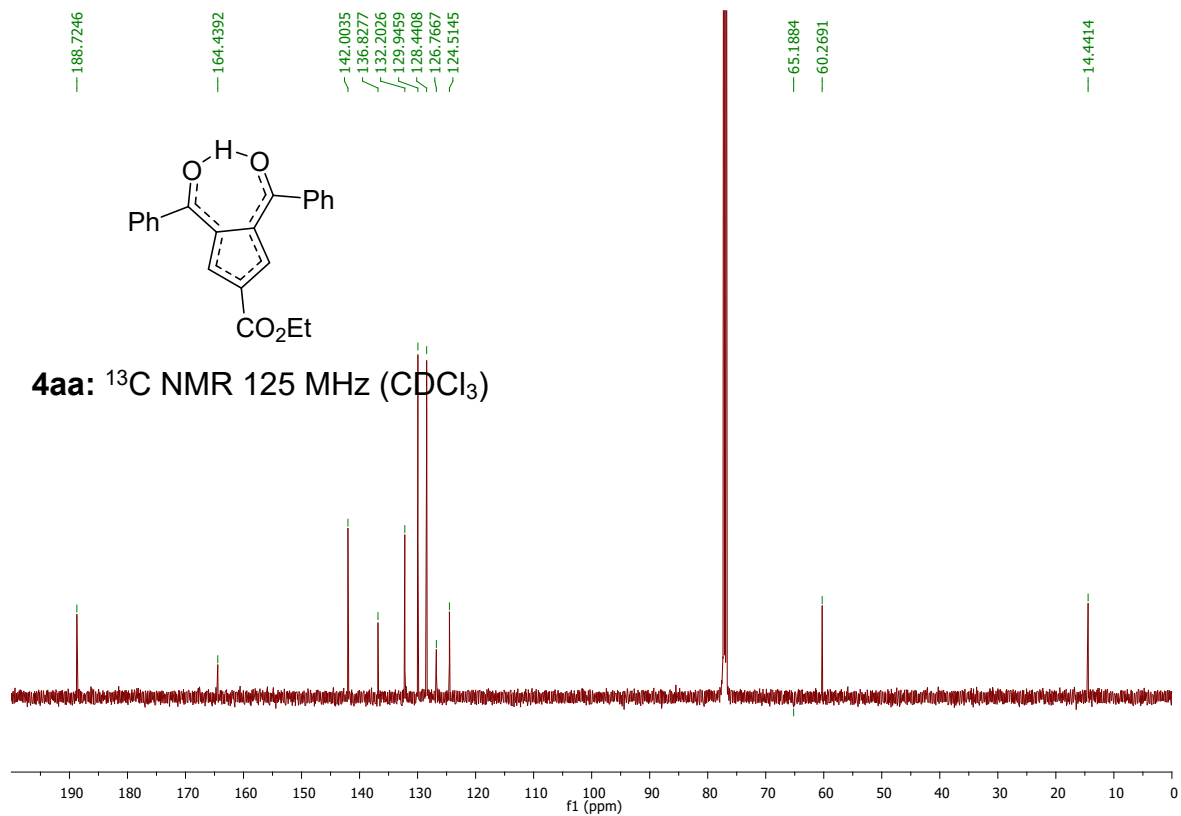

18.7841

7.8549  
7.8405  
7.7412  
7.7380  
7.6634  
7.6483  
7.6337  
7.5753  
7.5600  
7.5436  
7.5268  
7.4978  
7.4843  
7.4698  
7.4174  
7.4037  
7.3865  
7.3831  
7.2602  
4.2697  
4.2555  
4.2413  
4.2271

1.3050  
1.2908  
1.2765

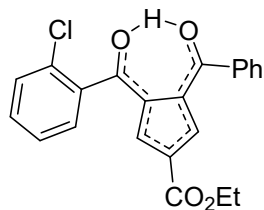

4na: <sup>1</sup>H NMR 500 MHz (CDCl<sub>3</sub>)

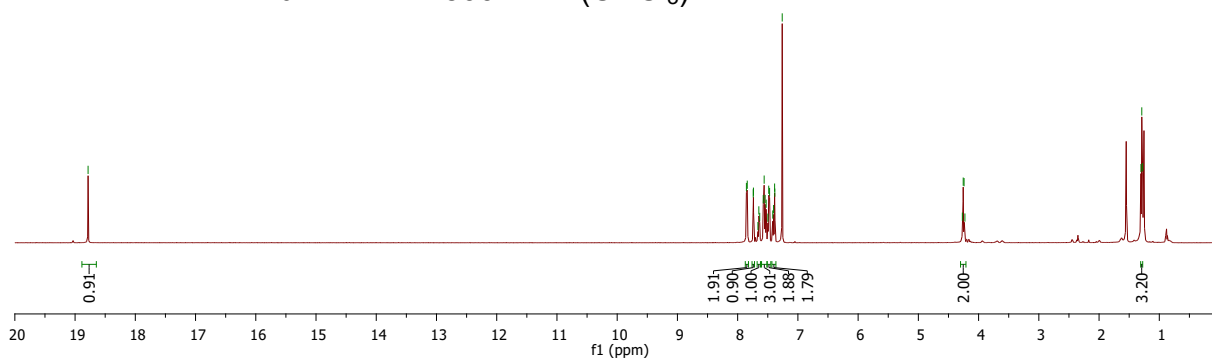

SS-MP-310

187.7340  
187.6169

164.2000

142.7381  
142.2387  
136.3894  
136.2170  
132.3799  
131.8878  
131.3823  
130.2953  
129.9827  
129.9502  
128.5300  
127.3356  
126.4112  
126.0351  
123.9287

60.3734

14.4186

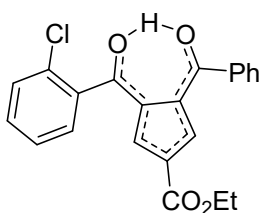

4na: <sup>13</sup>C NMR 125 MHz (CDCl<sub>3</sub>)

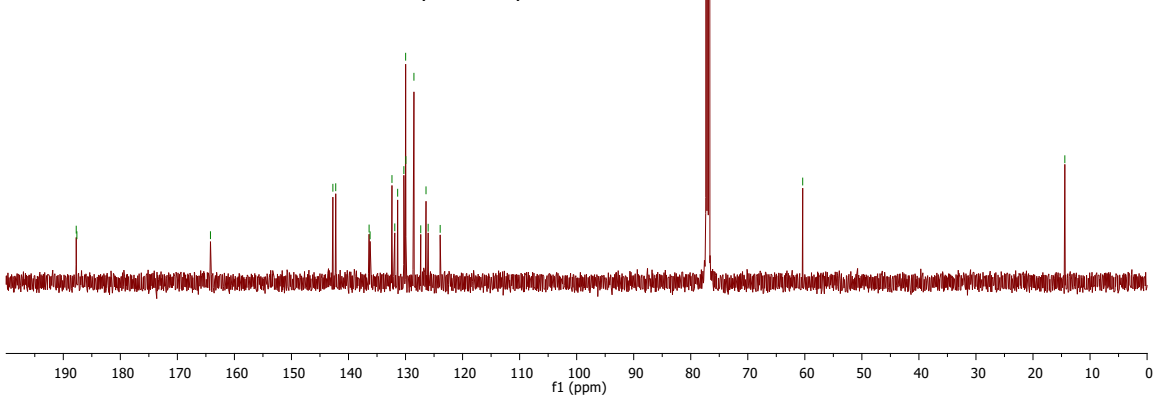

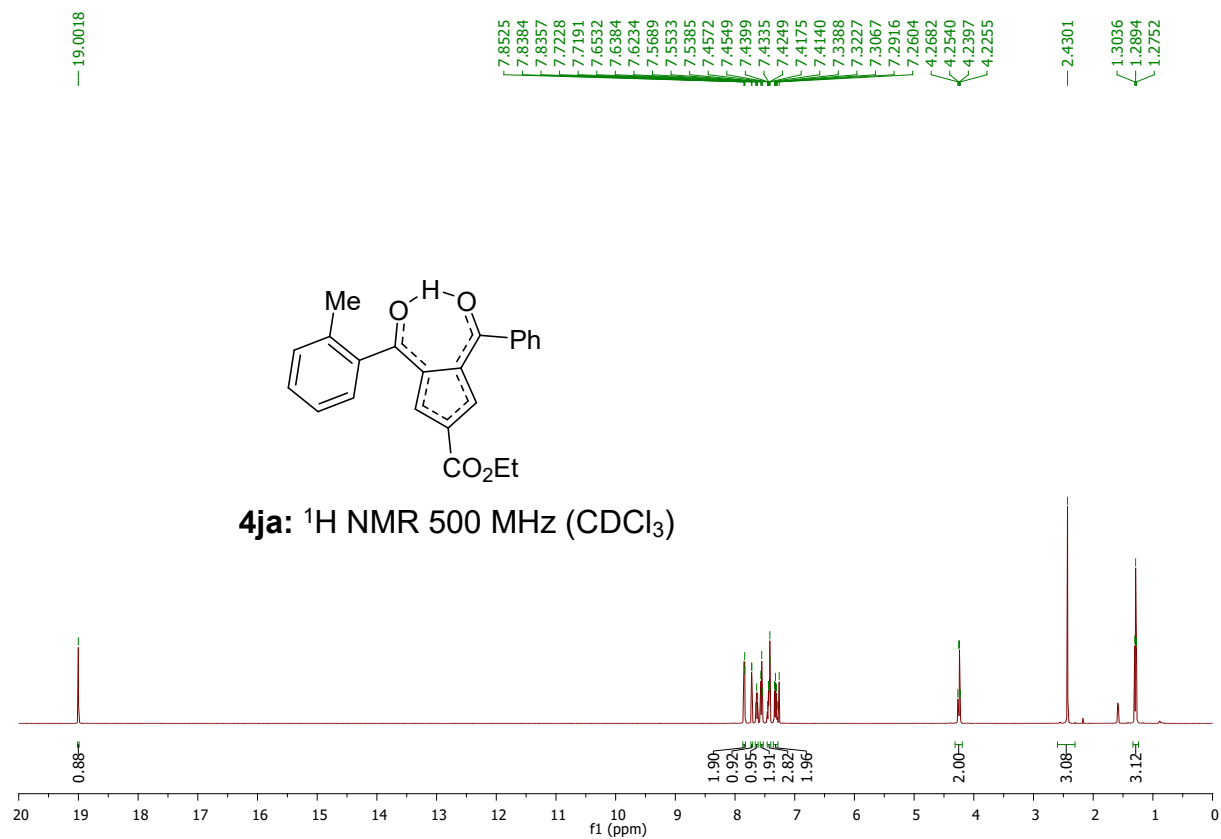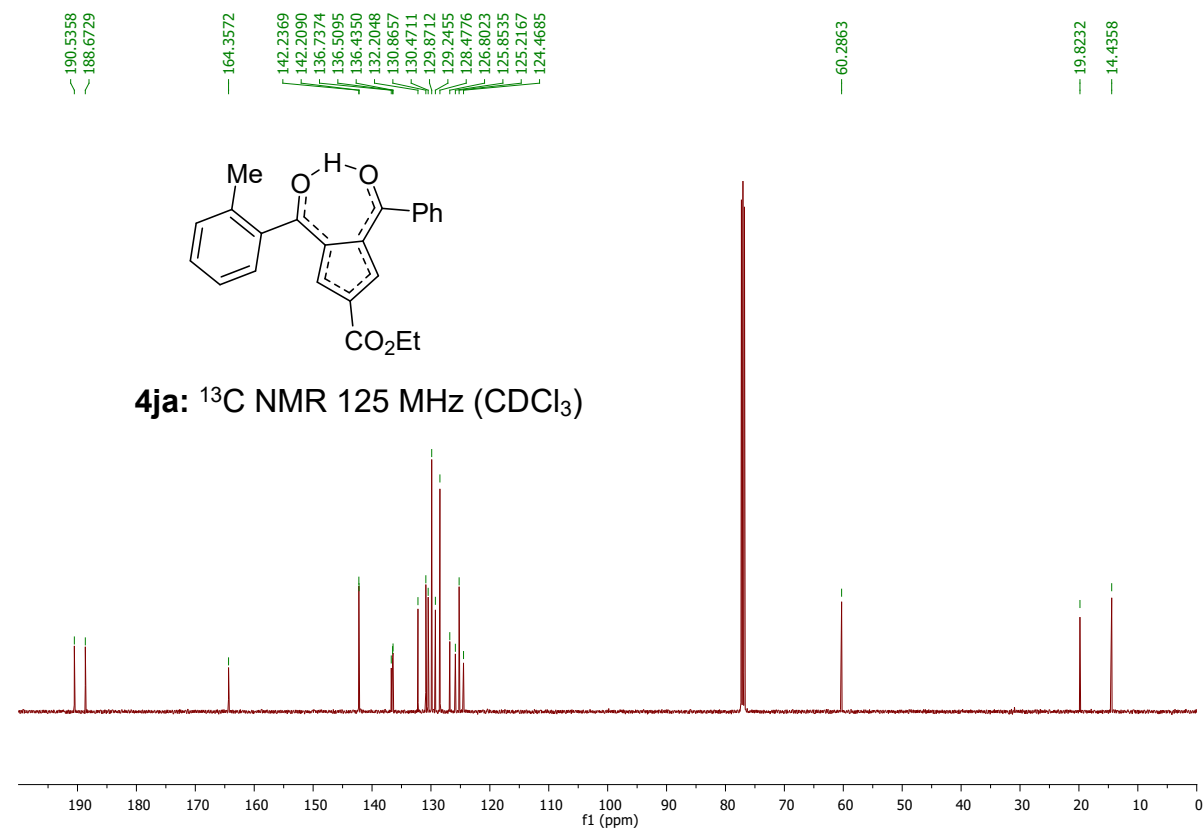

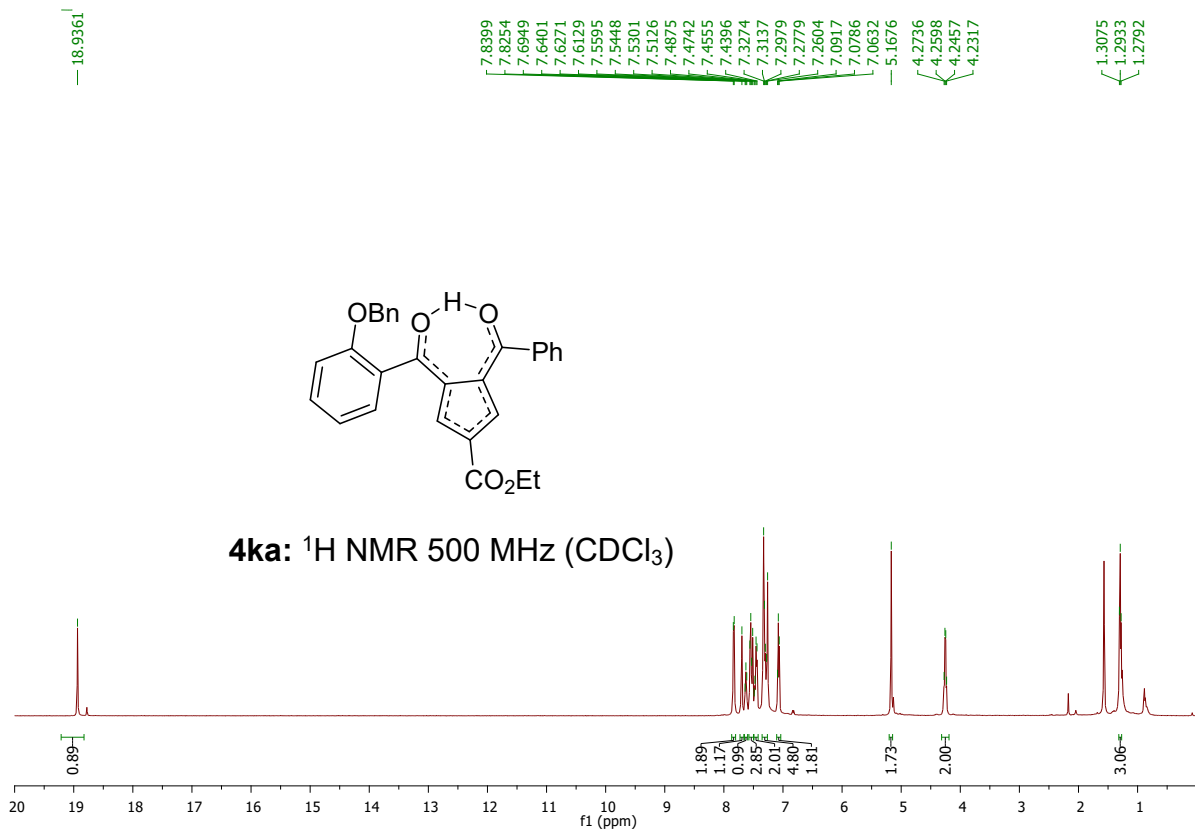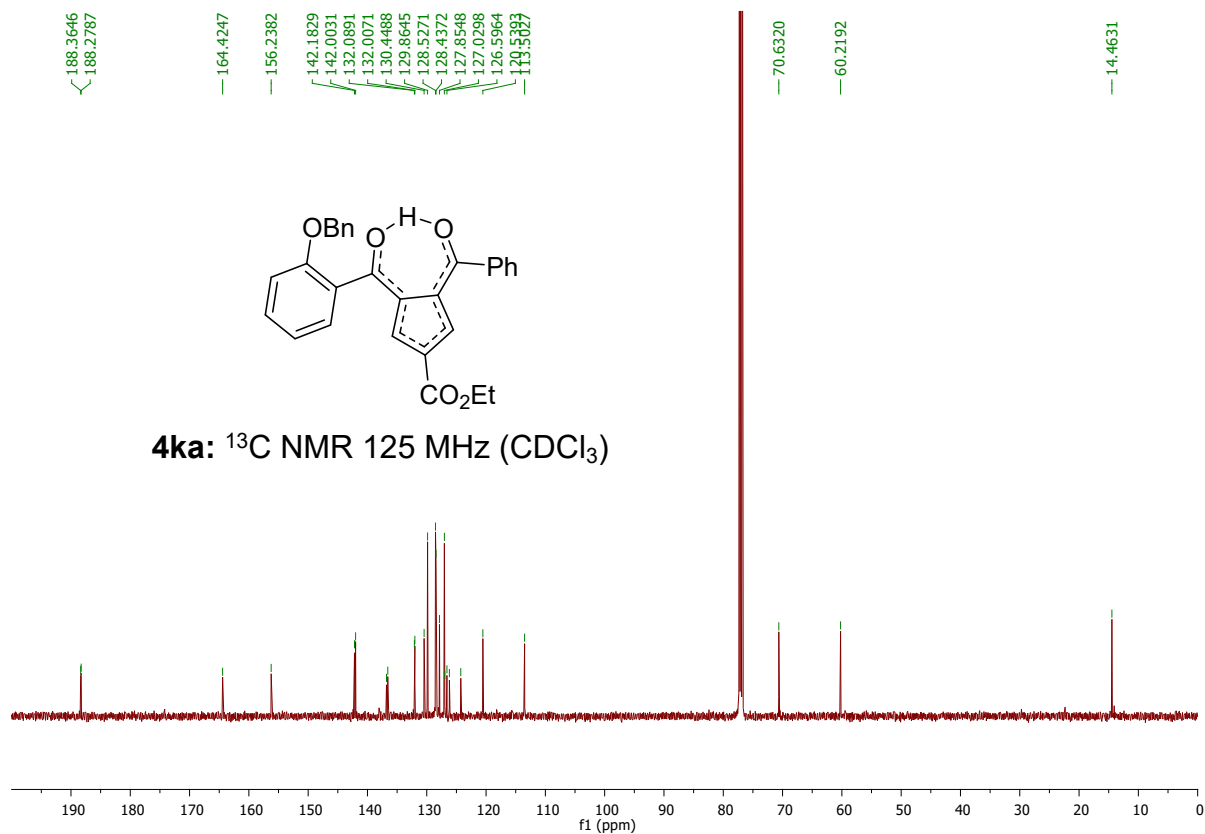

18.9264

7.8353  
7.8215  
7.6892  
7.6364  
7.6244  
7.6110  
7.5553  
7.5414  
7.5269  
7.5107  
7.4946  
7.4697  
7.4213  
7.4078  
7.2595  
7.0837  
7.0643  
7.0482  
4.2487  
4.2352  
3.8640  
1.2976  
1.2856  
1.2696

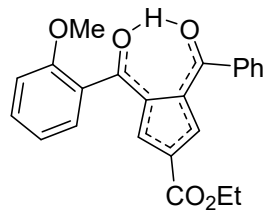

4ma: <sup>1</sup>H NMR 500 MHz (CDCl<sub>3</sub>)

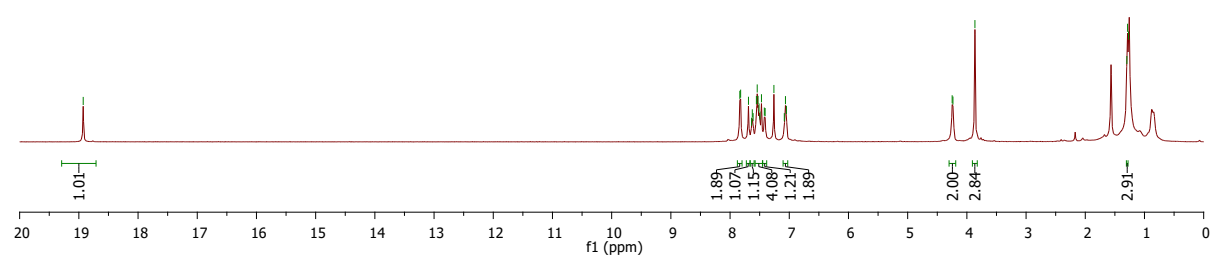

188.5066  
188.2210

164.4301  
157.1678  
142.2146  
142.0826  
136.7413  
132.0874  
132.0618  
130.3546  
129.8491  
128.4397  
126.6337  
126.3065  
126.2382  
124.2346  
120.1385  
111.6458  
104.2653

60.2260  
55.9217

14.4404

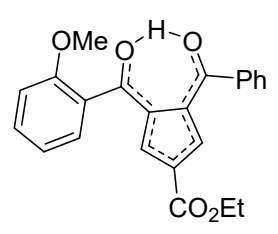

4ma: <sup>13</sup>C NMR 125 MHz (CDCl<sub>3</sub>)

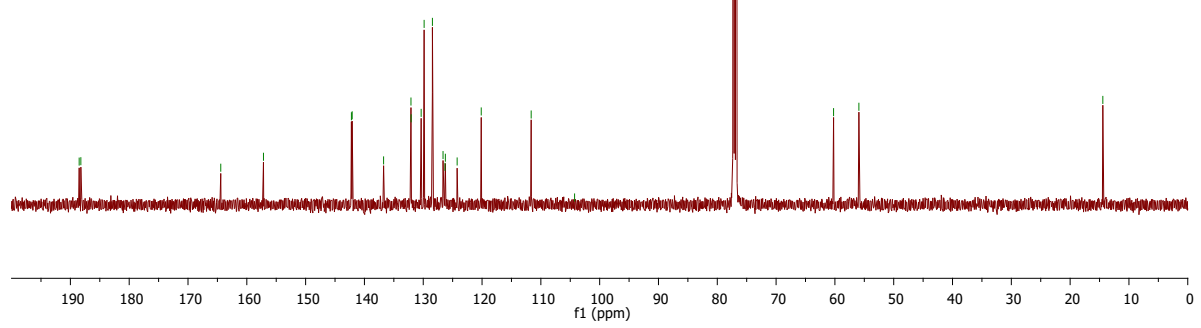



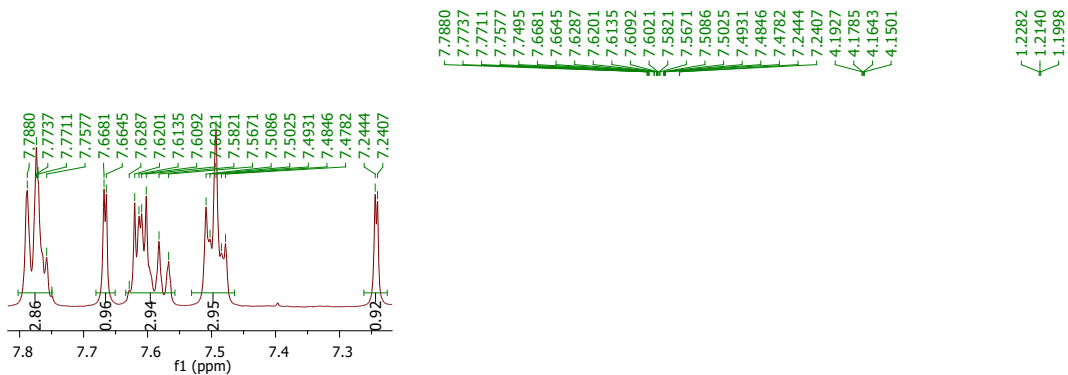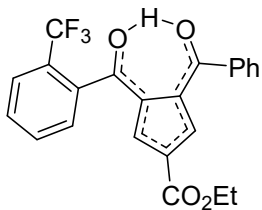

**4pa:**  $^1\text{H}$  NMR 500 MHz ( $\text{CDCl}_3$ )

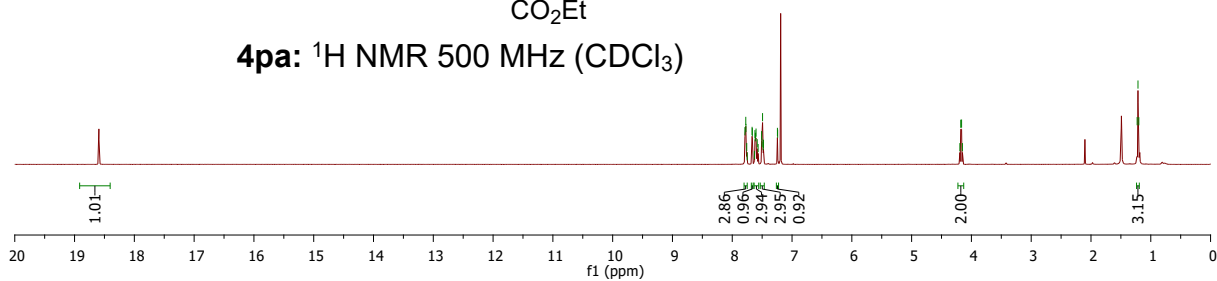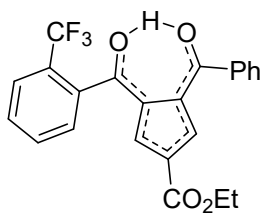

**4pa:**  $^{13}\text{C}$  NMR 125 MHz ( $\text{CDCl}_3$ )

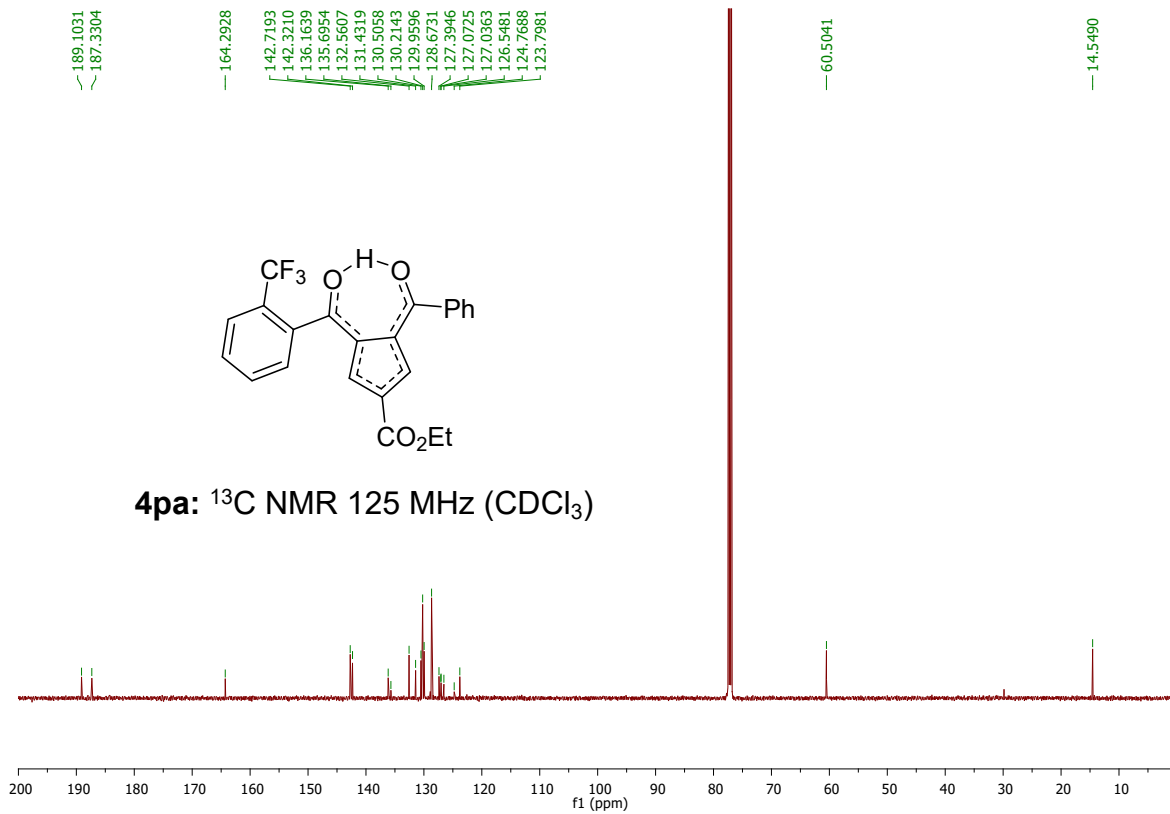

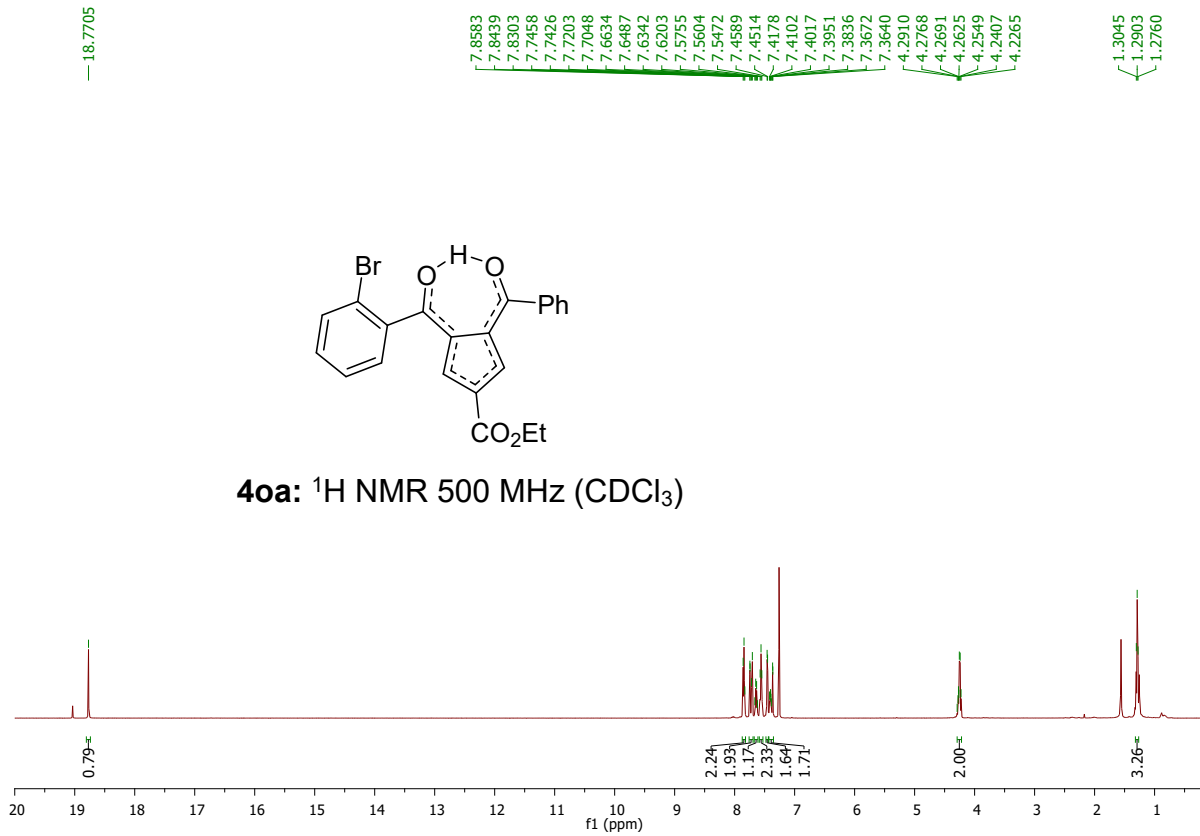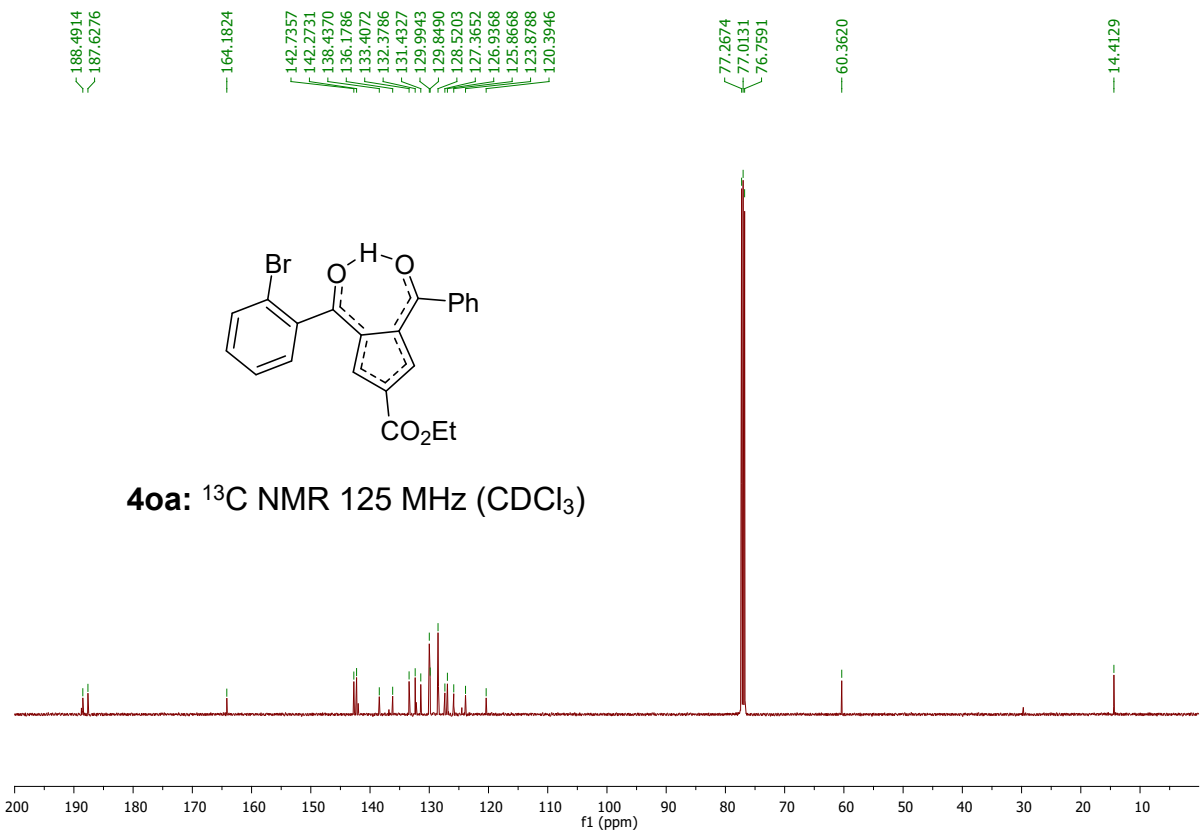

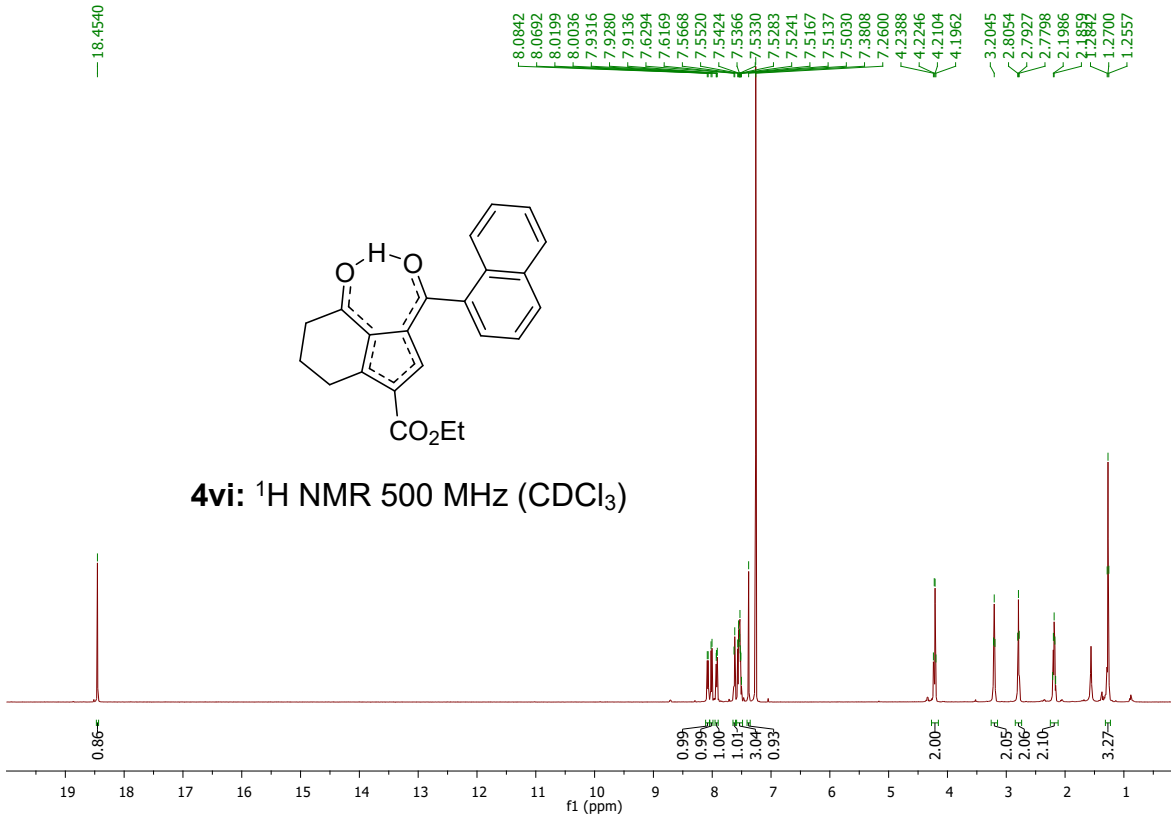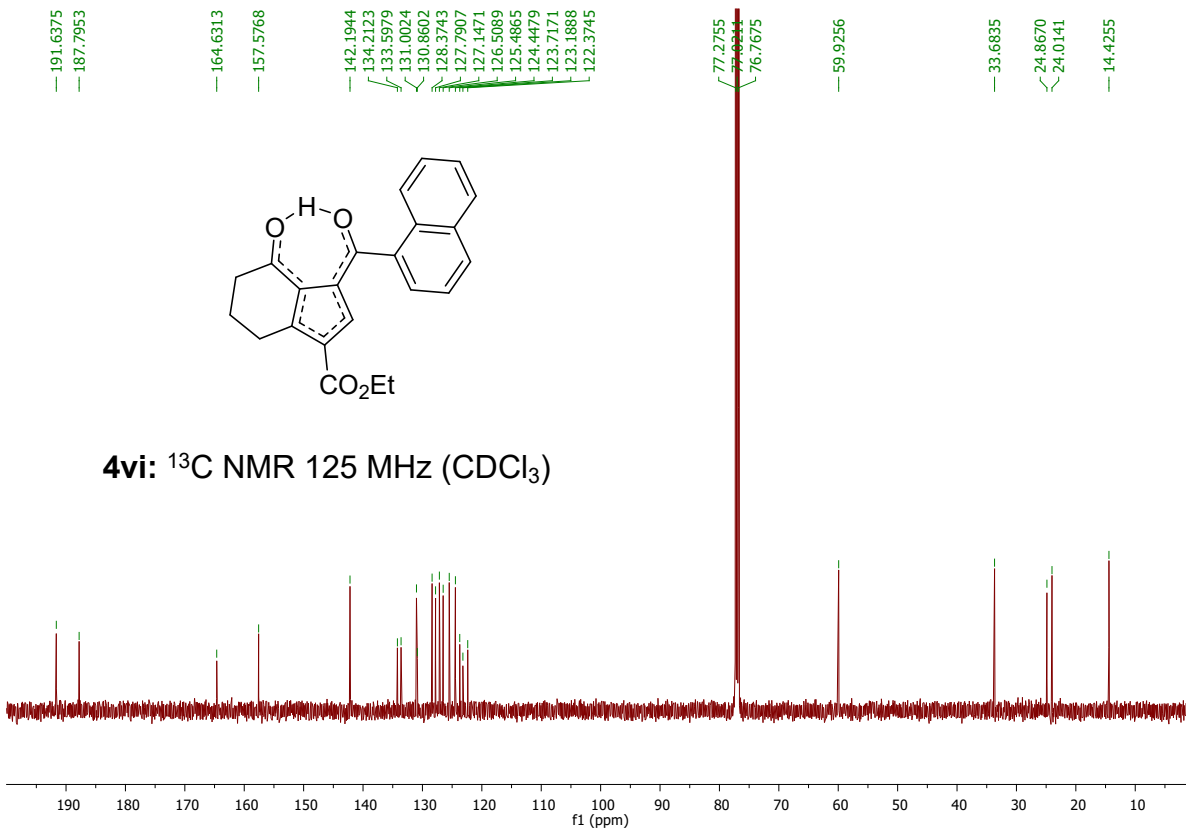

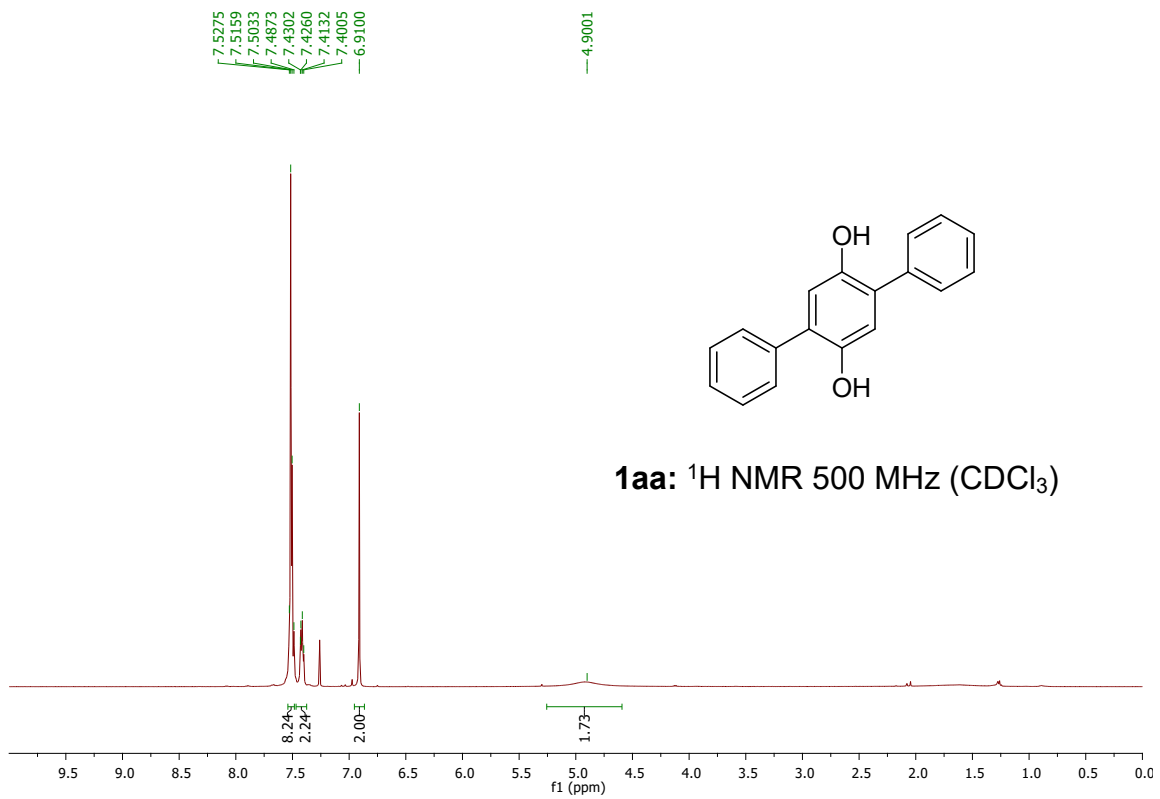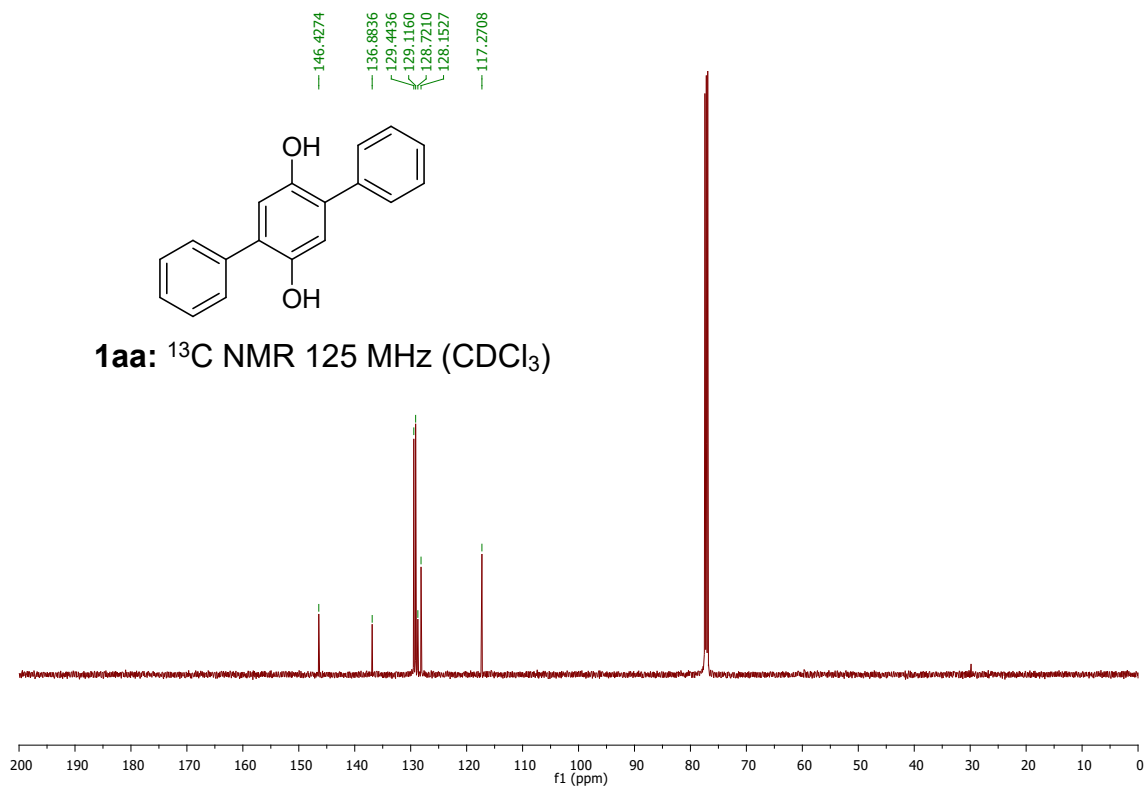

7.7967  
7.7818  
7.4216  
7.4062  
7.2427  
6.7357  
6.7345

4.4078  
4.3935  
4.3793  
4.3651

1.4132  
1.3990  
1.3847

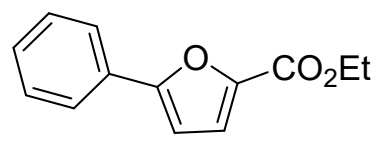

<sup>1</sup>H NMR 500 MHz (CDCl<sub>3</sub>)

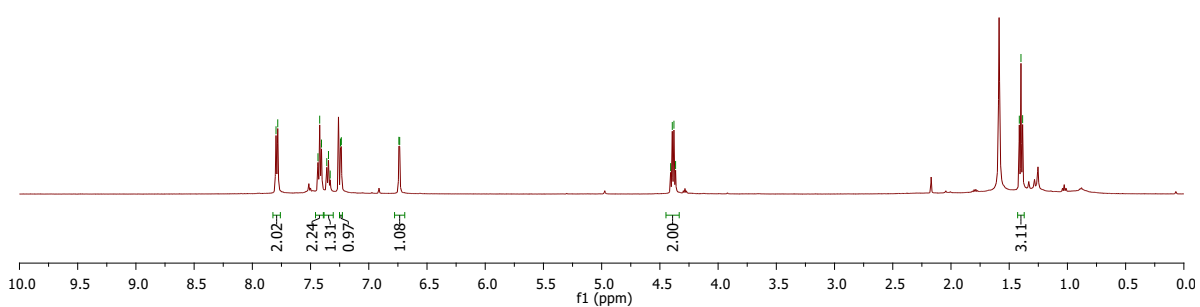

159.0386  
157.6209  
144.0274  
129.7099  
129.0313  
128.9498  
124.9819  
119.9542  
106.9433  
61.0451  
14.5419

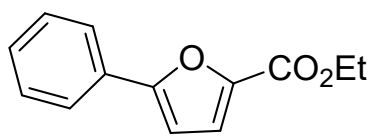

<sup>13</sup>C NMR 125 MHz (CDCl<sub>3</sub>)

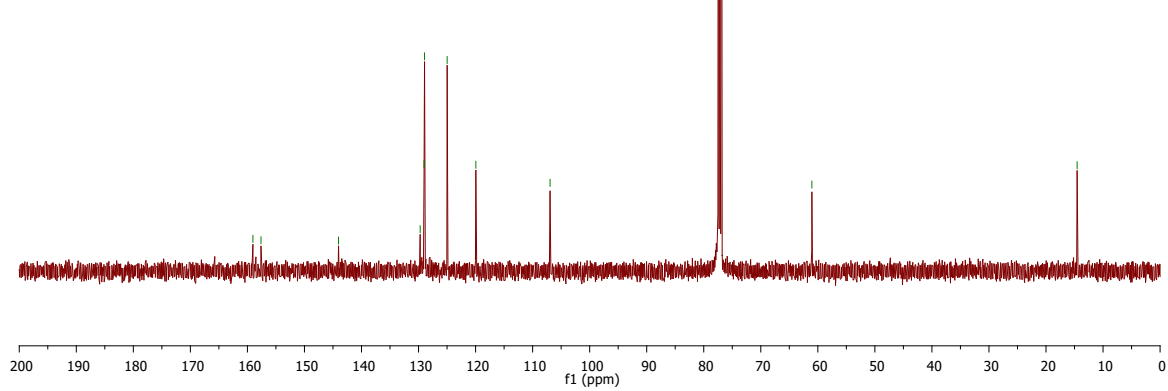

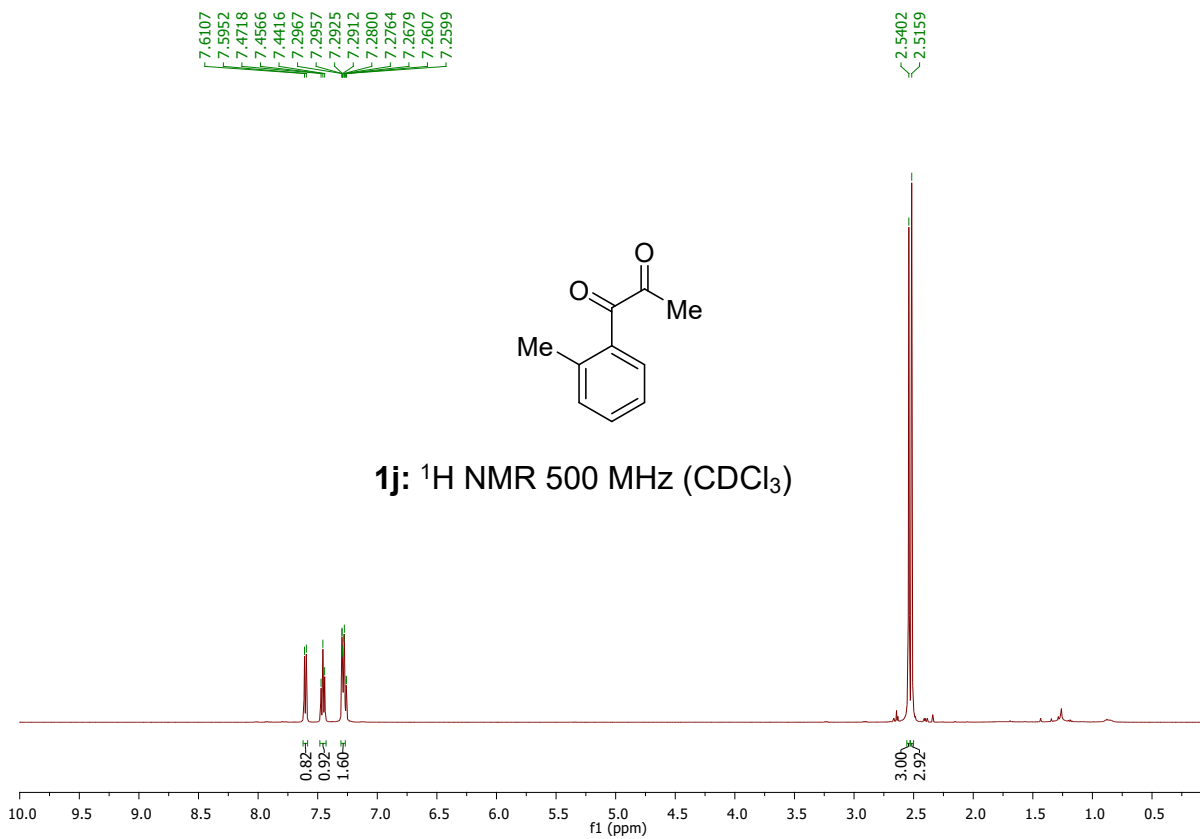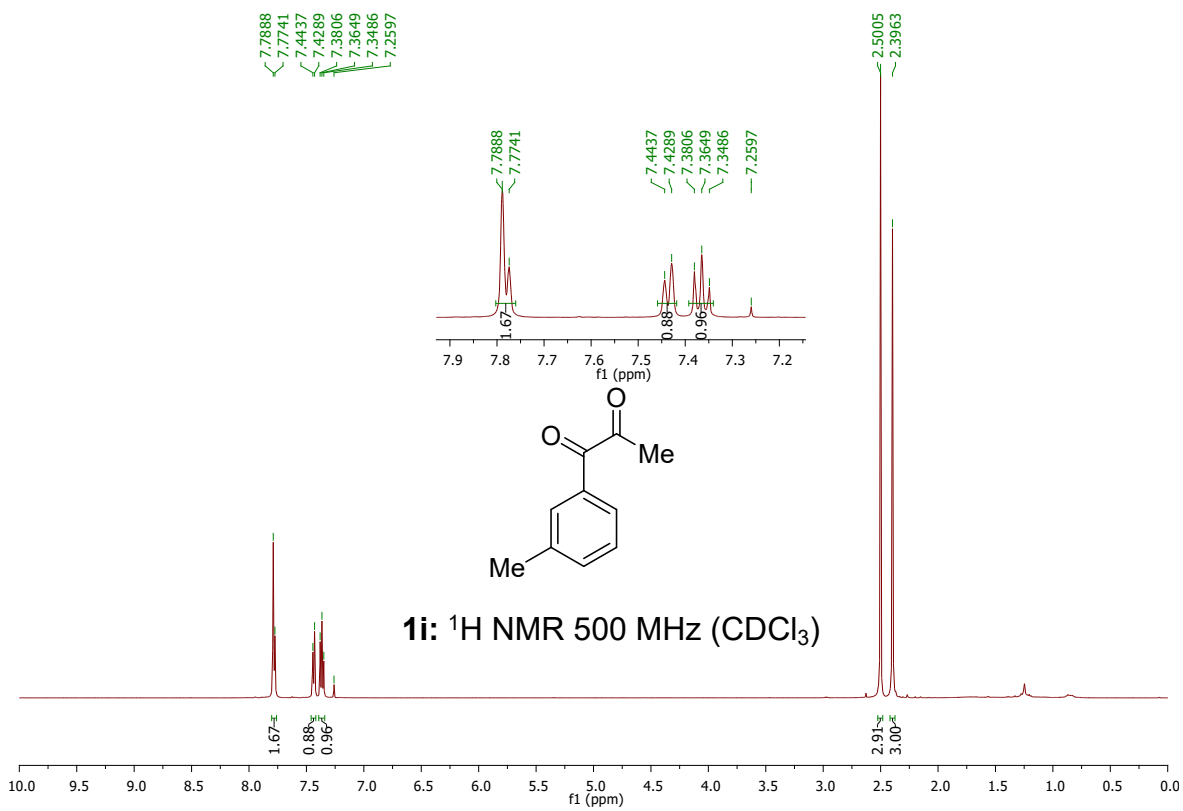

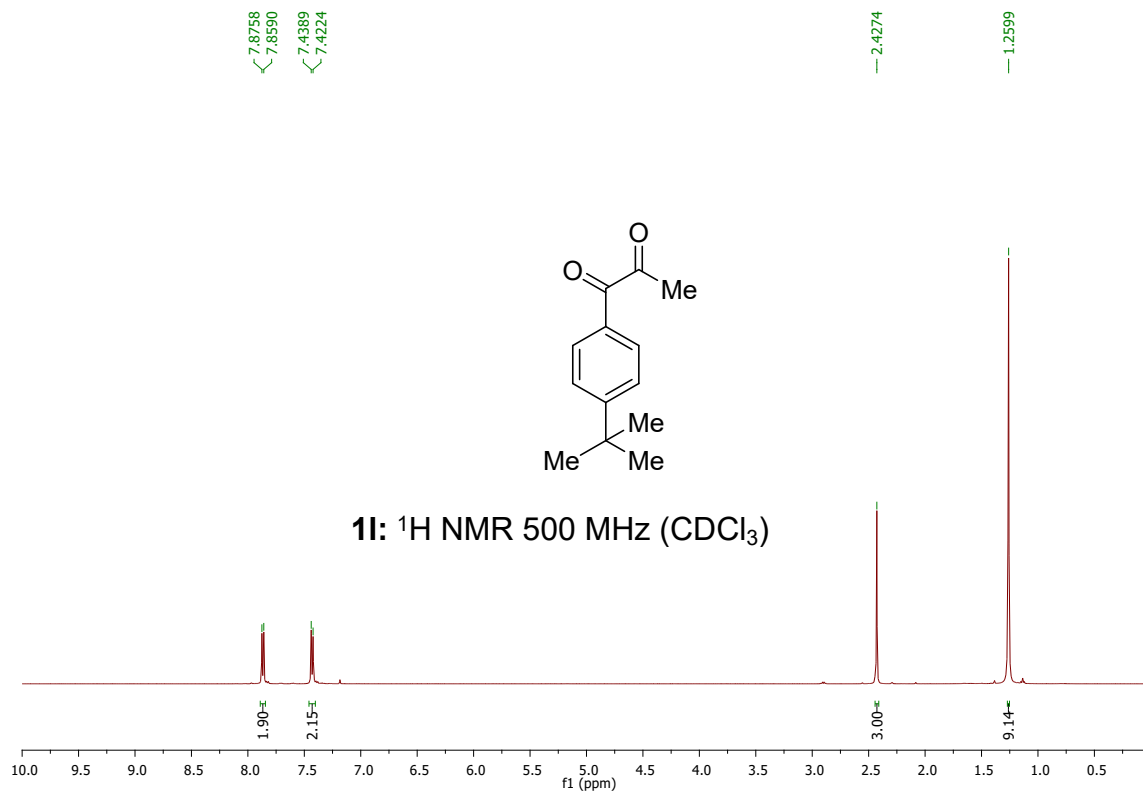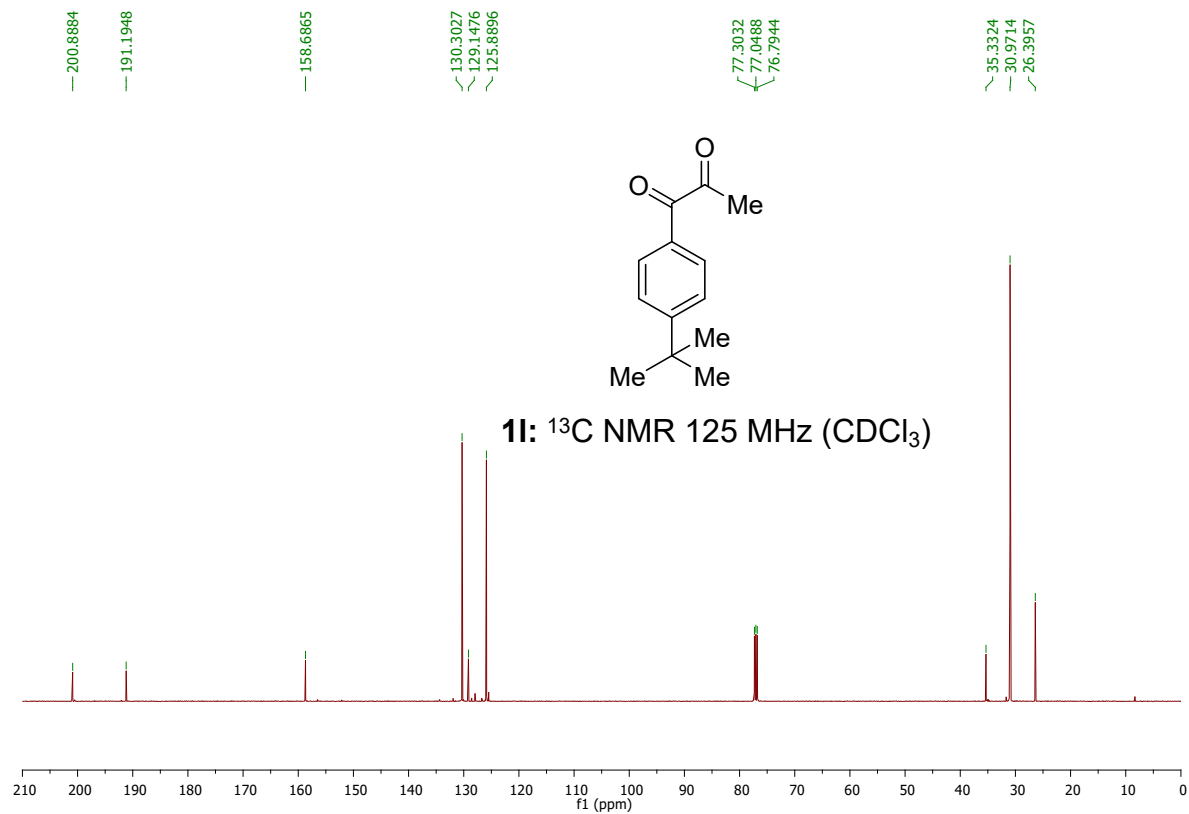

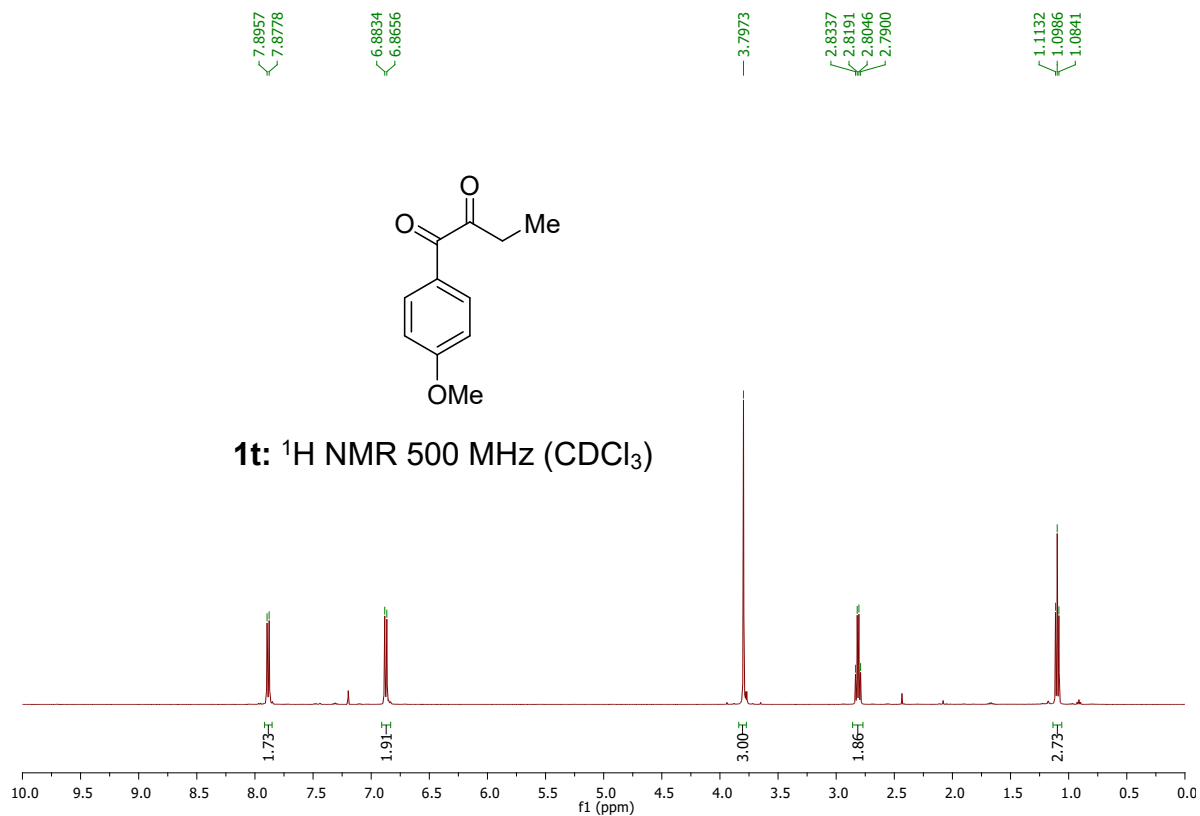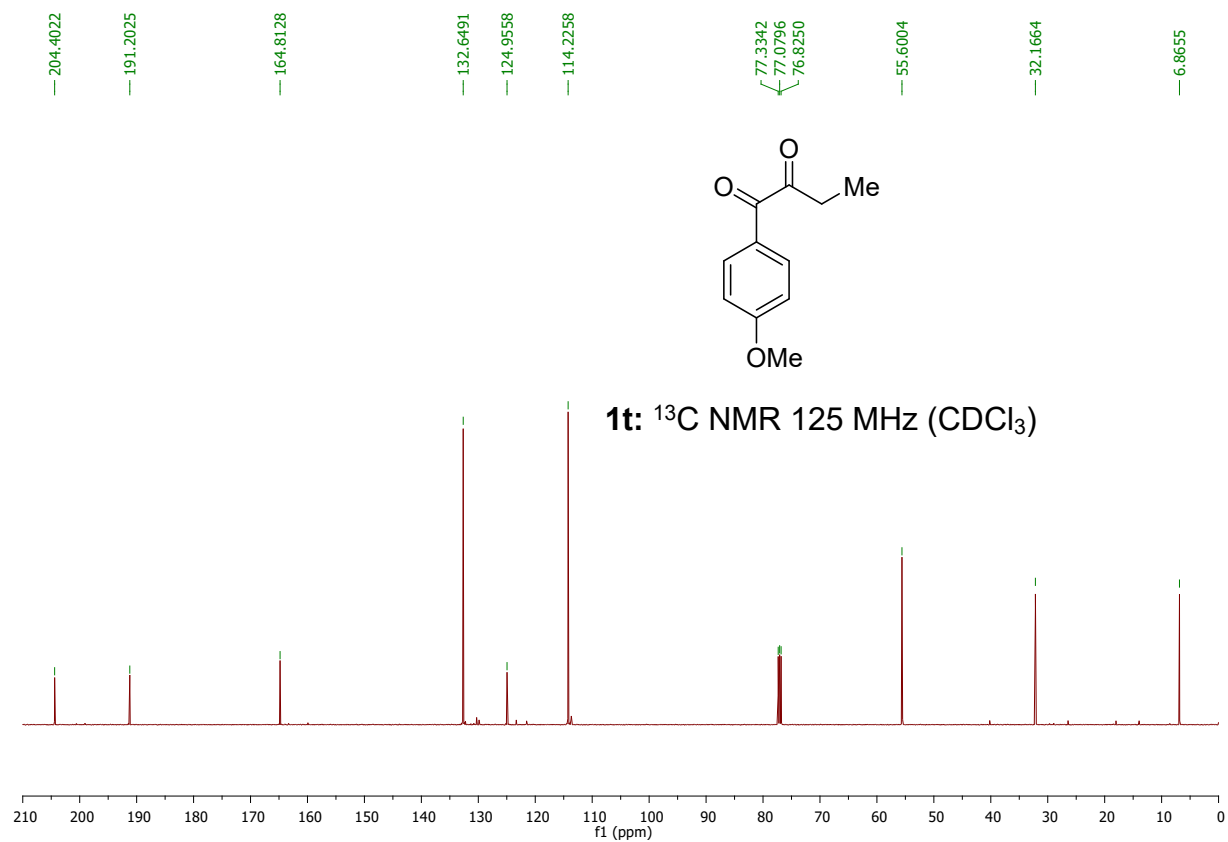



7.9869  
7.9725  
7.6524  
7.6376  
7.6227  
7.5103  
7.4945  
7.4791

2.9359  
2.9214  
2.9068  
2.8923

1.2136  
1.1991  
1.1845

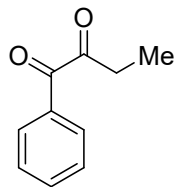

1r: <sup>1</sup>H NMR 500 MHz (CDCl<sub>3</sub>)

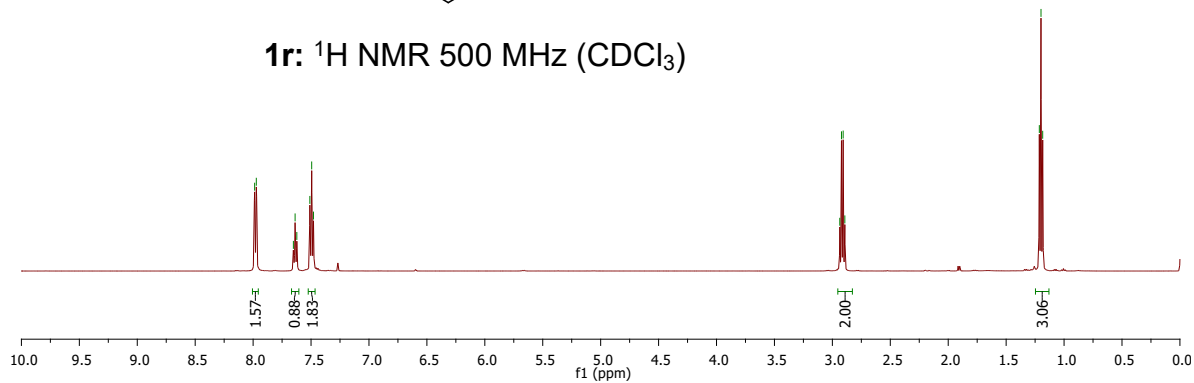

203.8442

192.5773

134.5807  
132.0194  
130.1490  
128.8537

77.3019  
77.0477  
76.7932

32.1260

6.8051

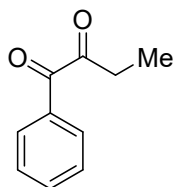

1r: <sup>13</sup>C NMR 125 MHz (CDCl<sub>3</sub>)

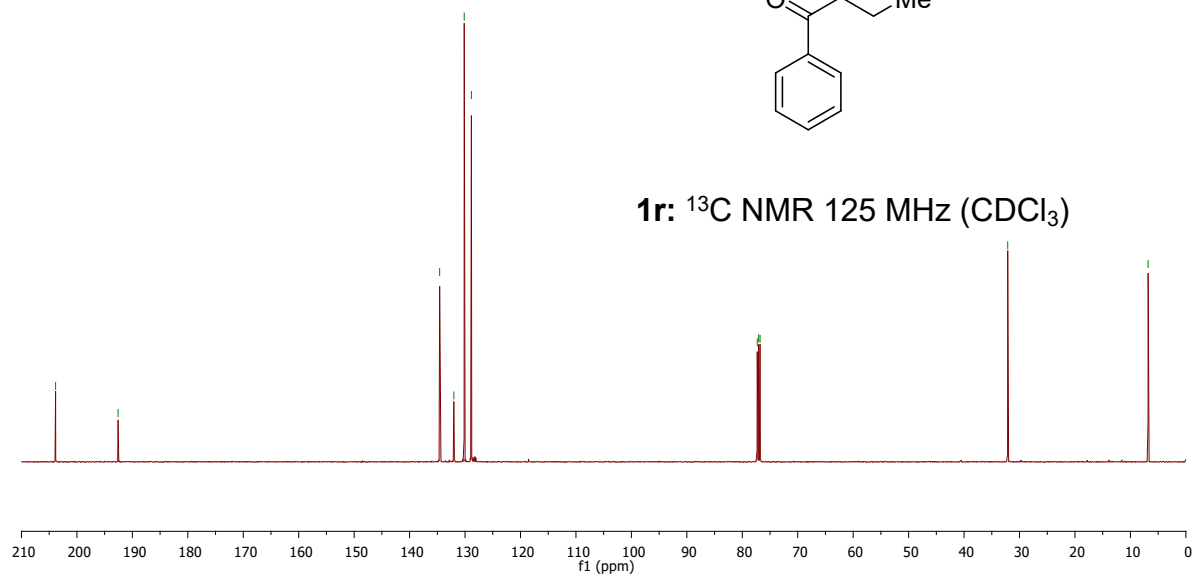

7.9833  
7.9689  
7.6348  
7.6199  
7.5086  
7.4927  
7.4774

2.8855  
2.8708  
2.8559  
1.6962  
1.6814  
1.3182  
1.3144  
1.3025  
1.2887  
1.2827  
1.2765  
0.8597  
0.8492  
0.8451

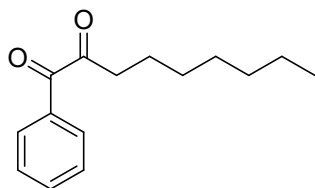

1s:  $^1\text{H}$  NMR 500 MHz ( $\text{CDCl}_3$ )

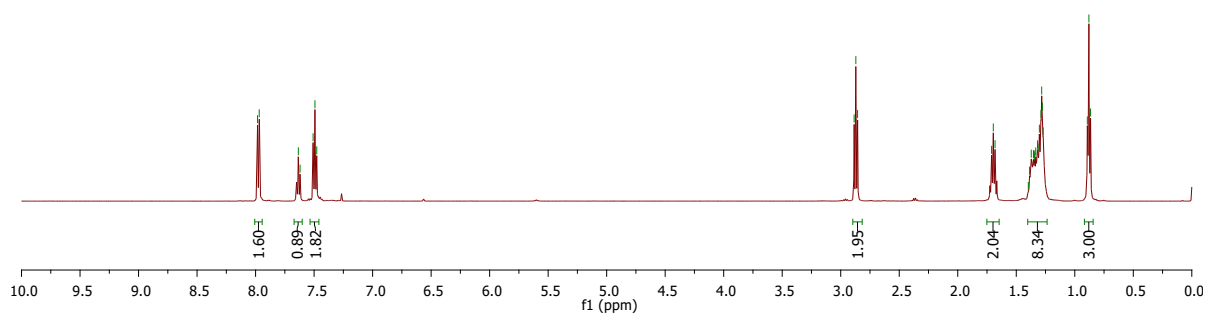

203.5504

192.6055

134.5509  
132.0423  
130.1573  
128.8489

77.2974  
77.0431  
76.7890

38.8020  
31.6212  
29.1299  
28.9977  
22.8849  
22.5878  
14.0535

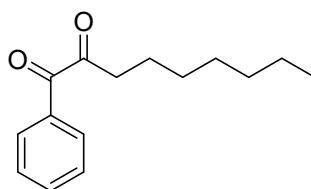

1s:  $^{13}\text{C}$  NMR 125 MHz ( $\text{CDCl}_3$ )

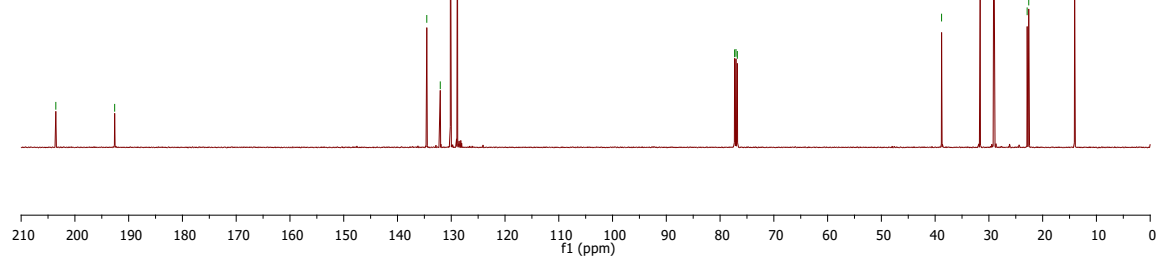

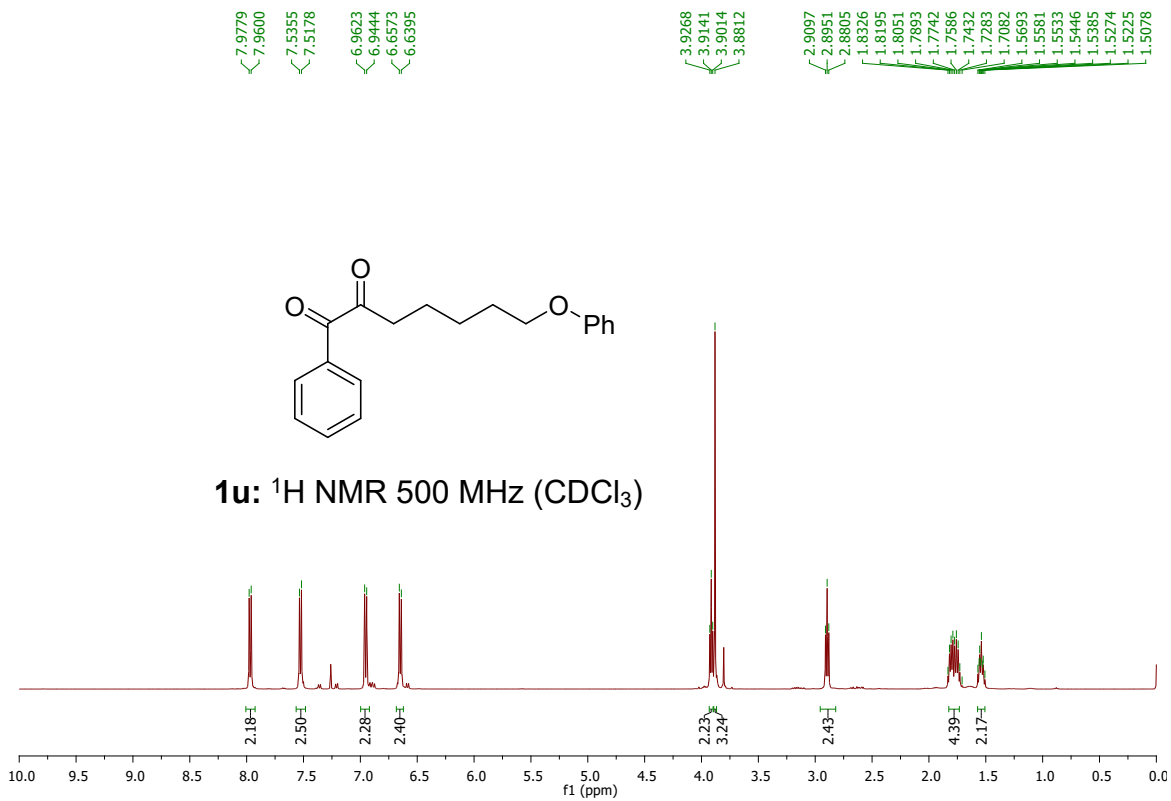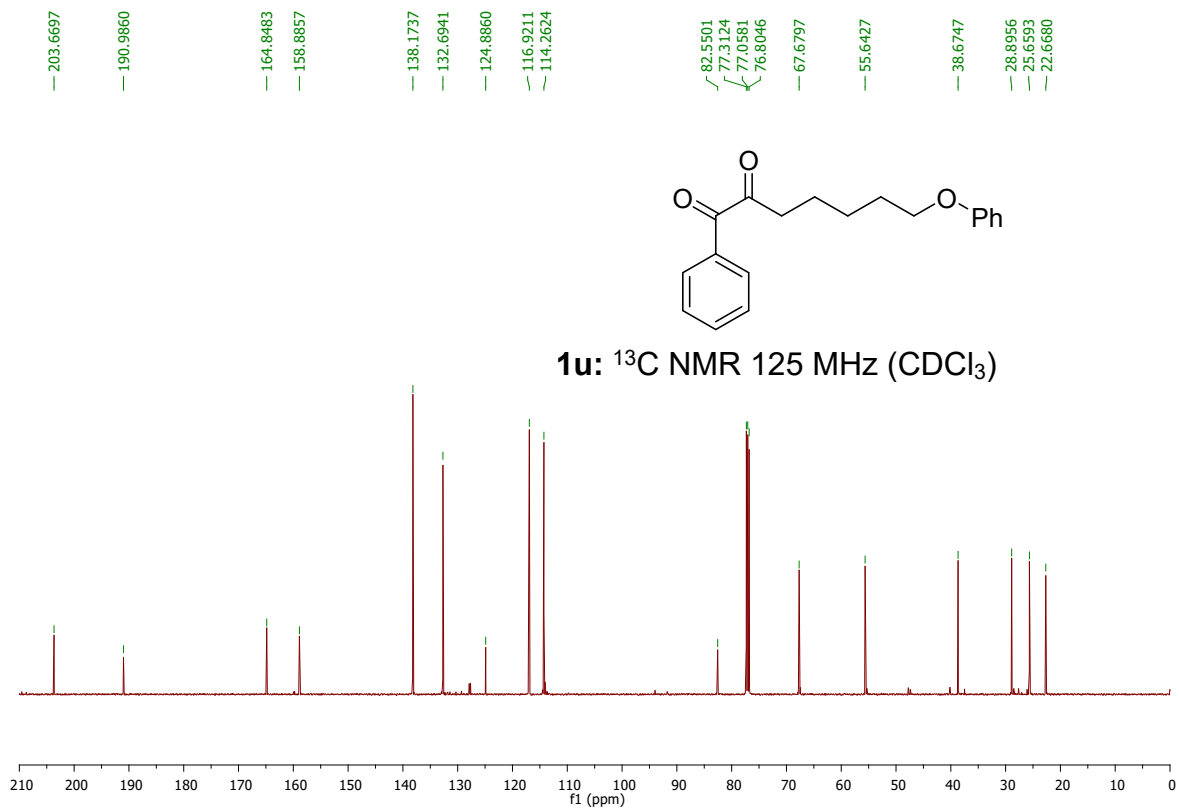

SS-MP-BR-DIKETO

7.8346  
7.8175  
7.5708  
7.5536

2.4458

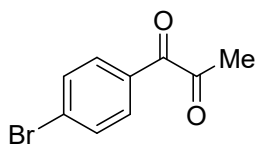

**1c:**  $^1\text{H}$  NMR 500 MHz ( $\text{CDCl}_3$ )

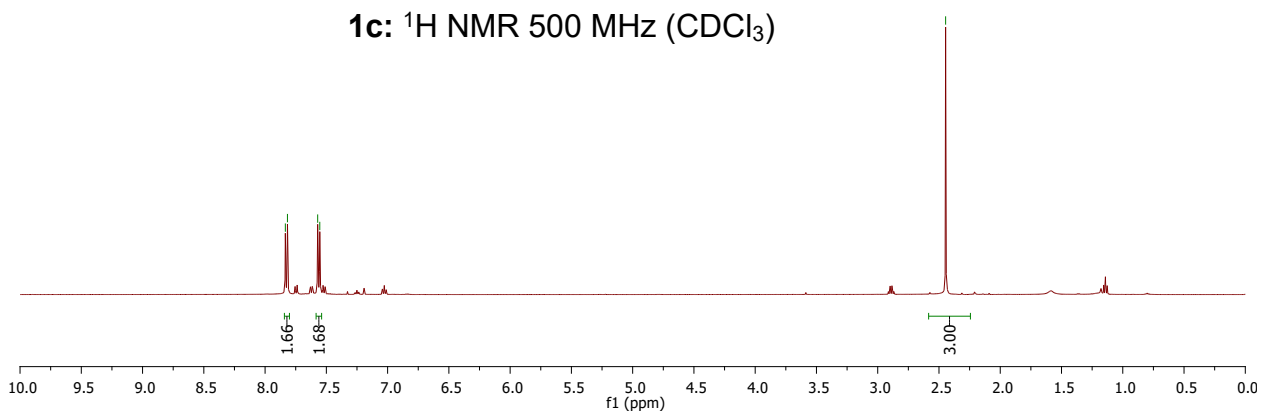

SS-MP-DIKETO

8.0323  
8.0174  
7.6709  
7.6561  
7.6411  
7.5275  
7.5120  
7.4964

2.5405

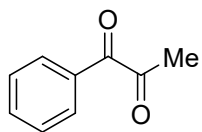

**1a:**  $^1\text{H}$  NMR 500 MHz ( $\text{CDCl}_3$ )

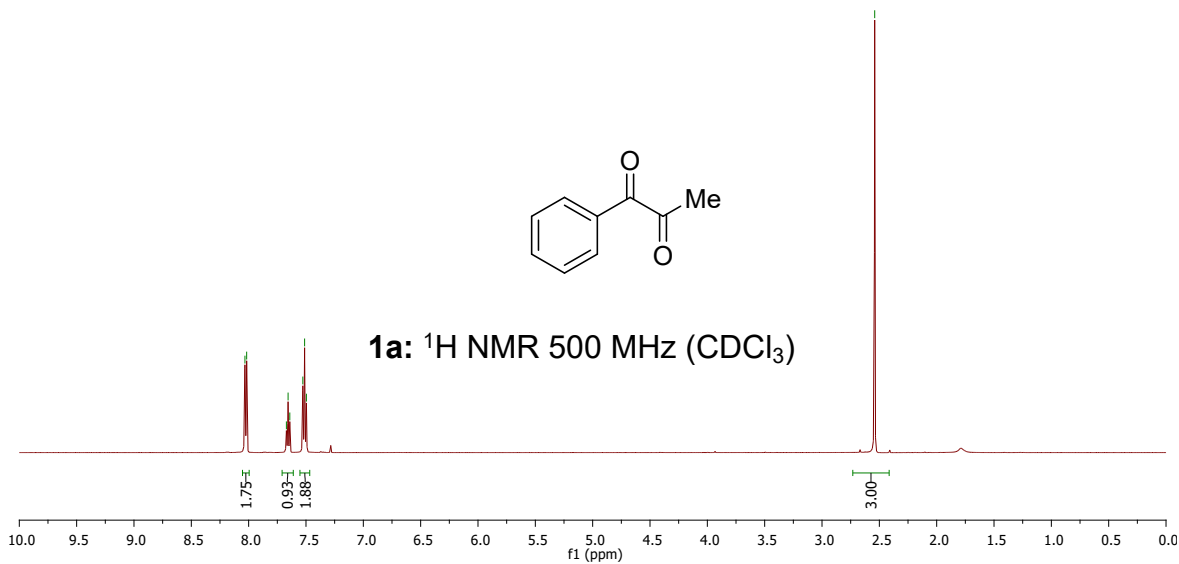

SS-MP-DIKETO-1

7.8203  
7.8039  
7.2018  
7.1852

2.4119  
2.3308

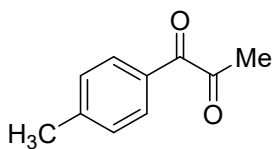

**1g:** <sup>1</sup>H NMR 500 MHz (CDCl<sub>3</sub>)

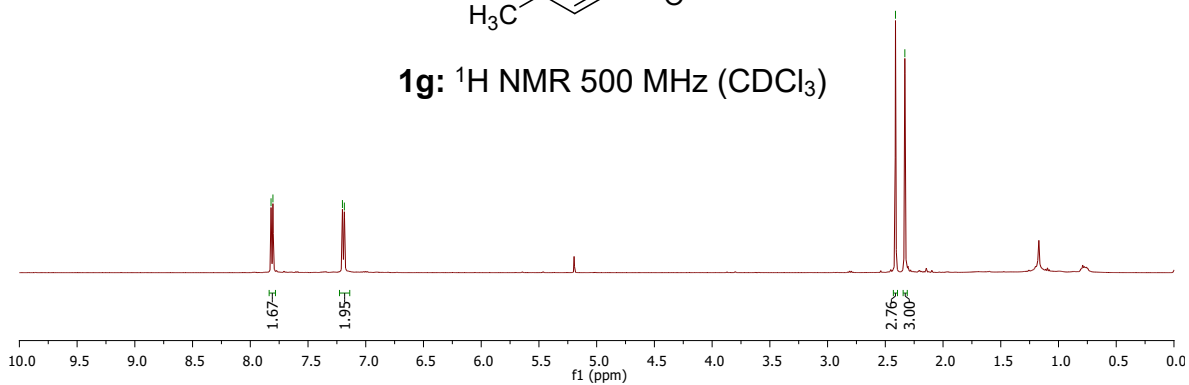

8.9127  
8.8955  
8.0867  
8.0703  
7.9096  
7.8952  
7.6783  
7.6641  
7.6474  
7.5891  
7.5748  
7.5592  
7.5351  
7.5231  
7.5072  
7.4922

2.6127

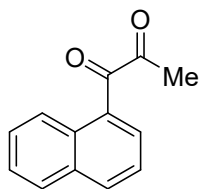

**1q:** <sup>1</sup>H NMR 500 MHz (CDCl<sub>3</sub>)

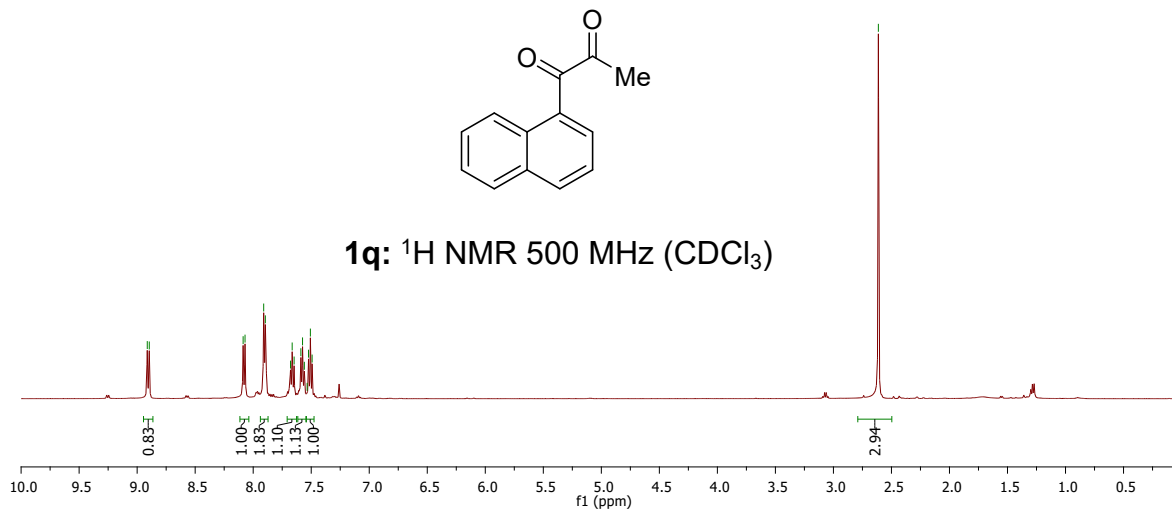

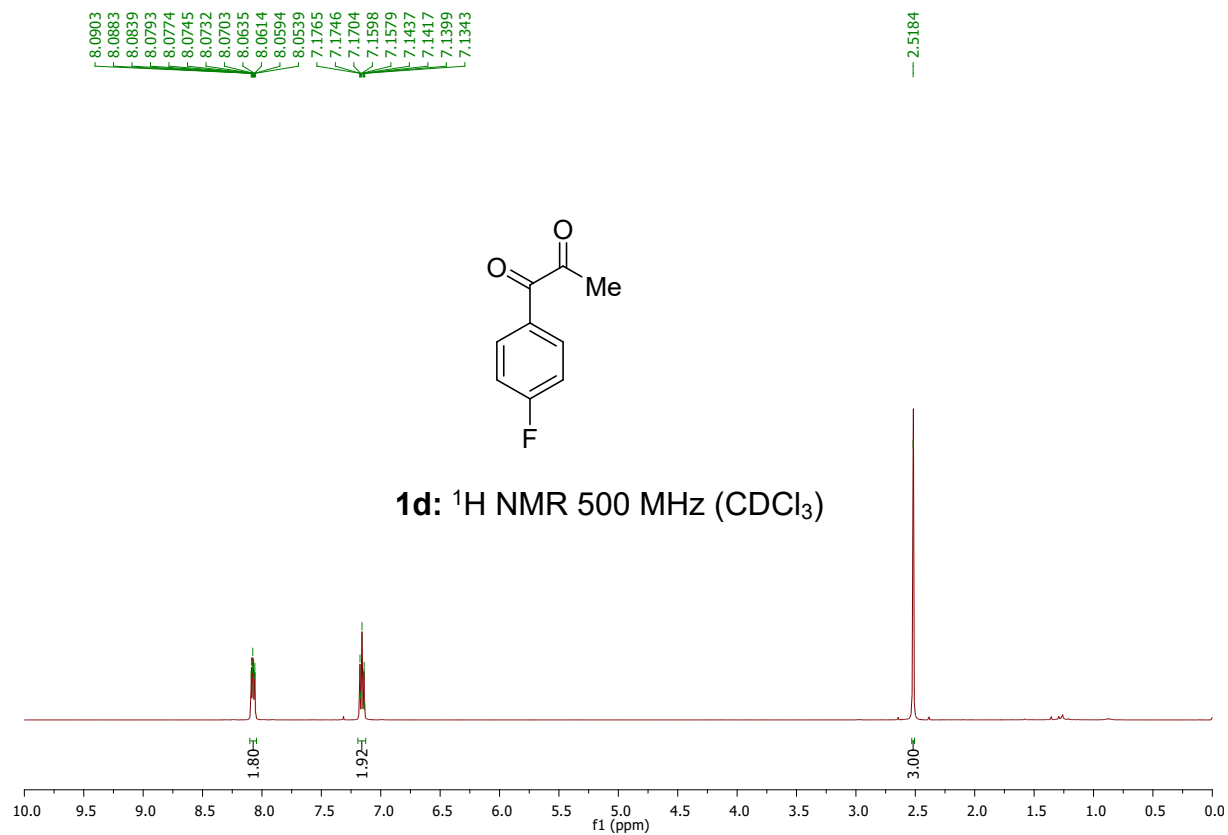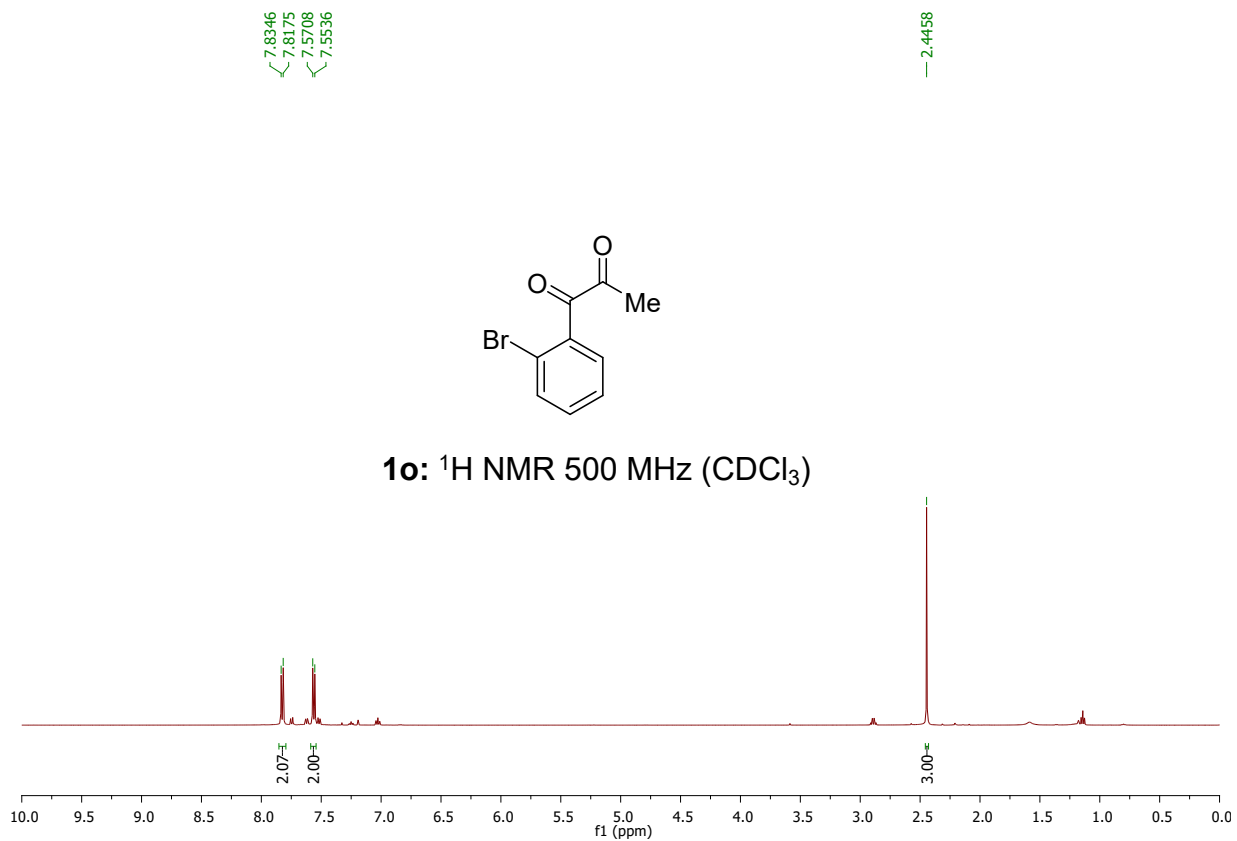

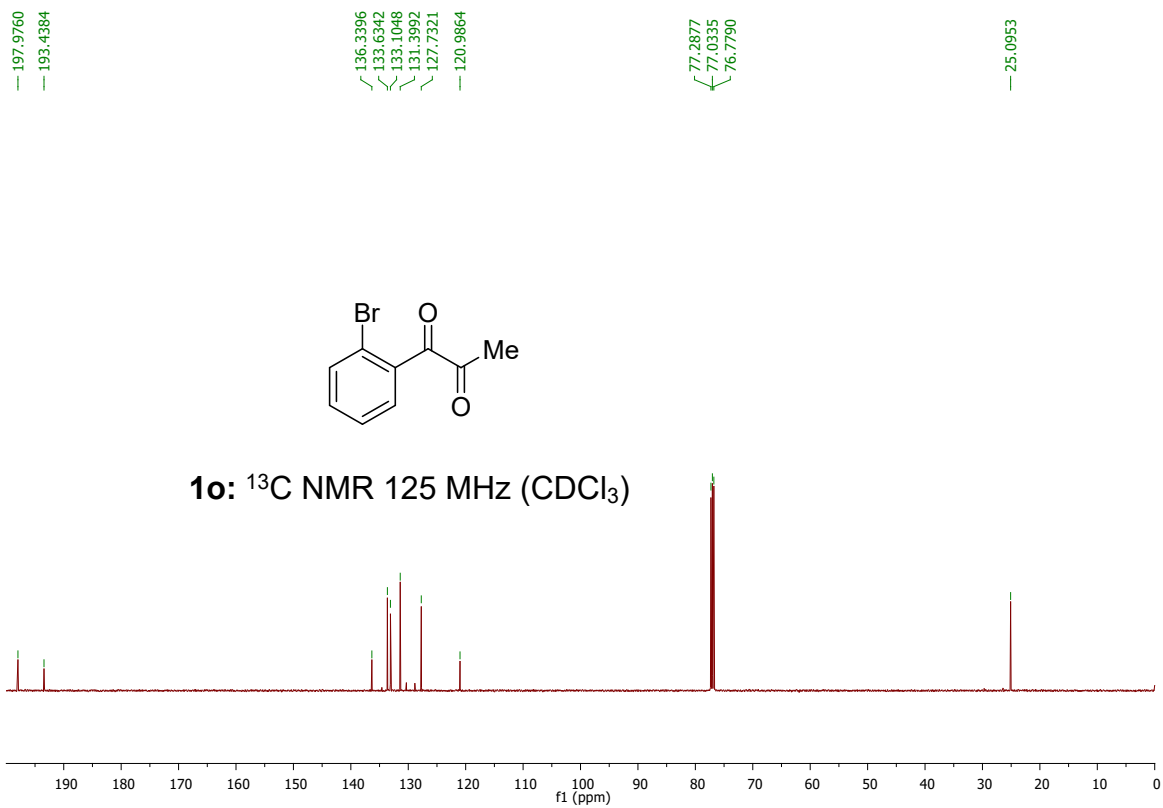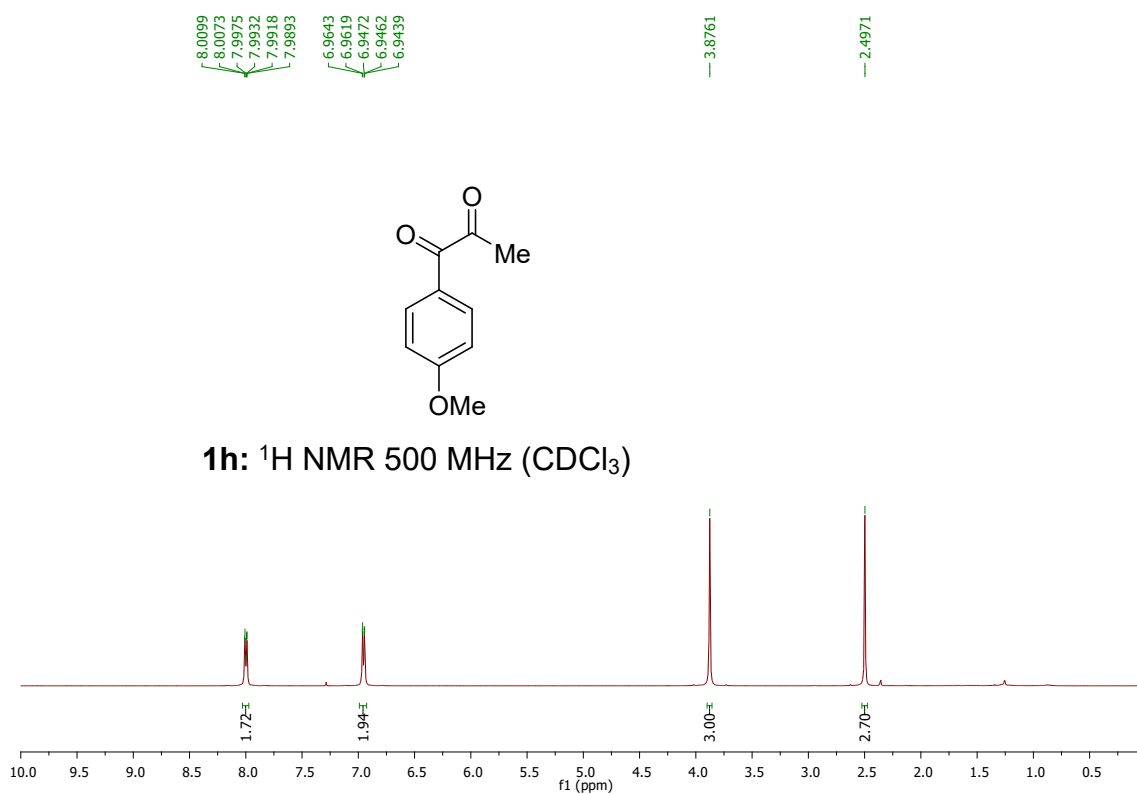

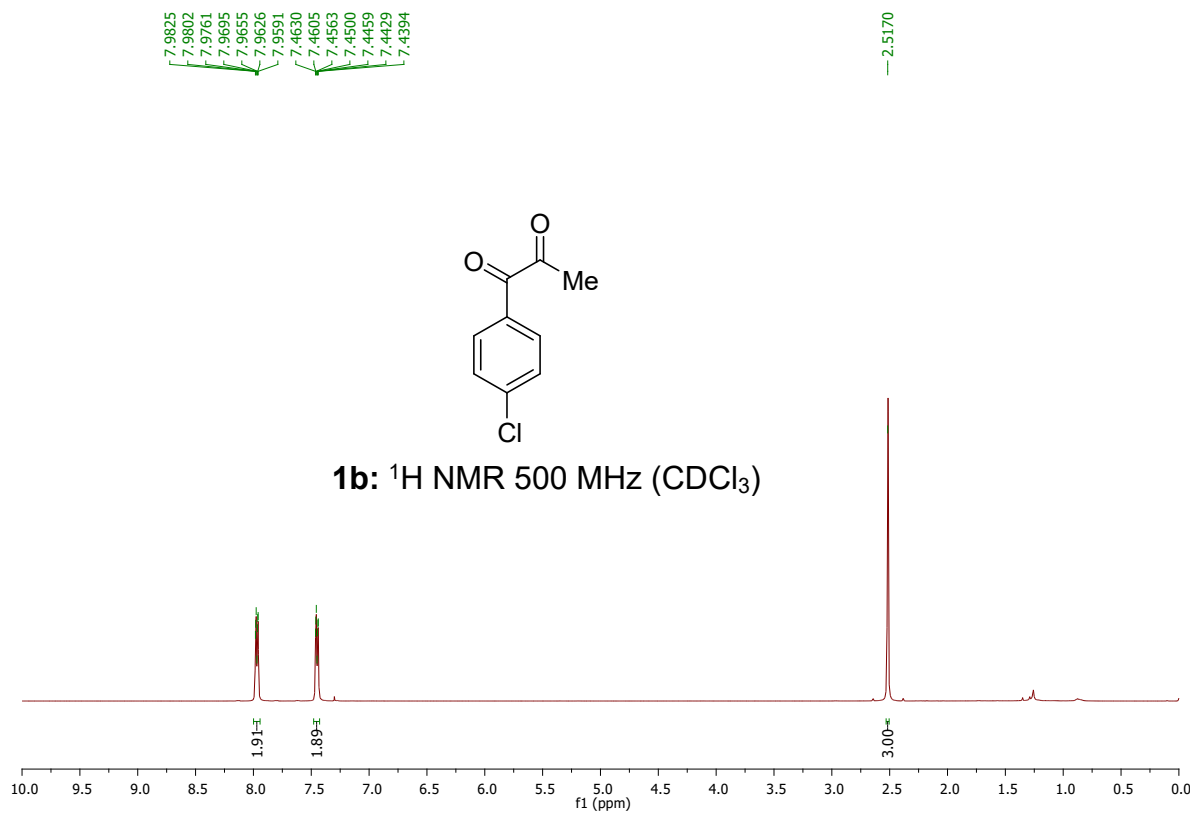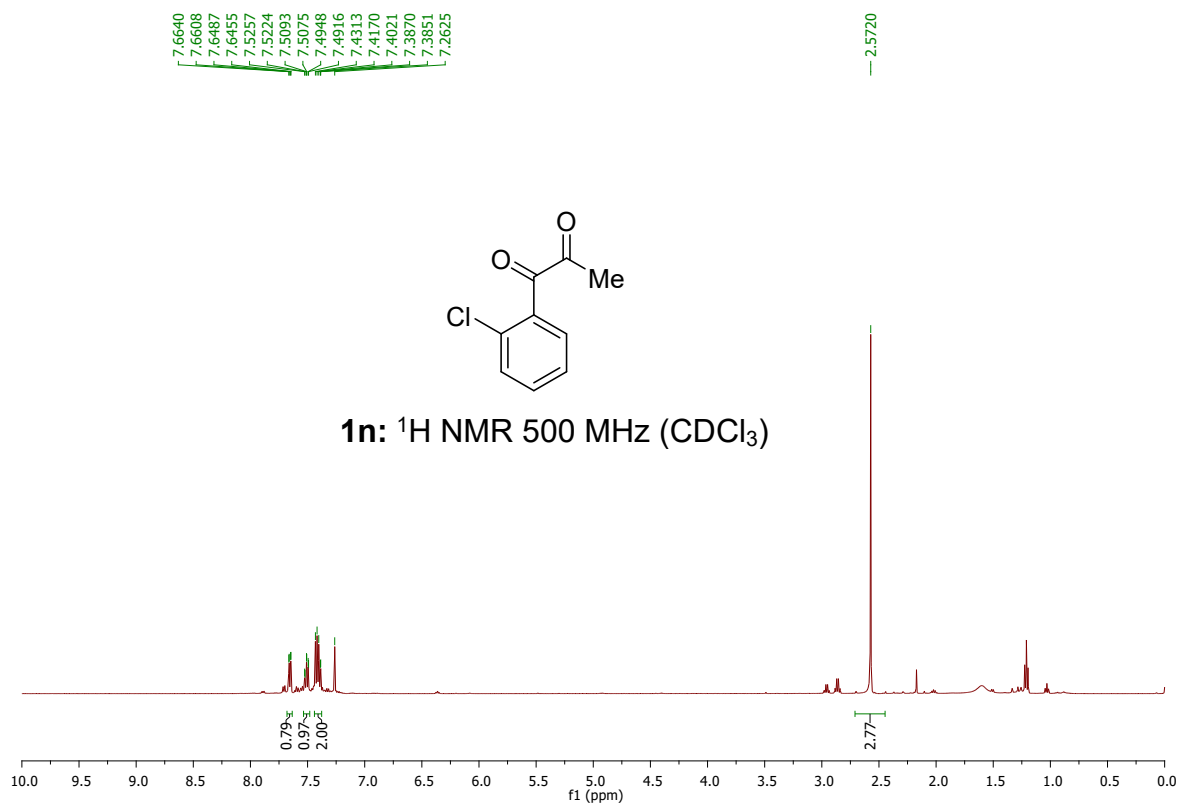



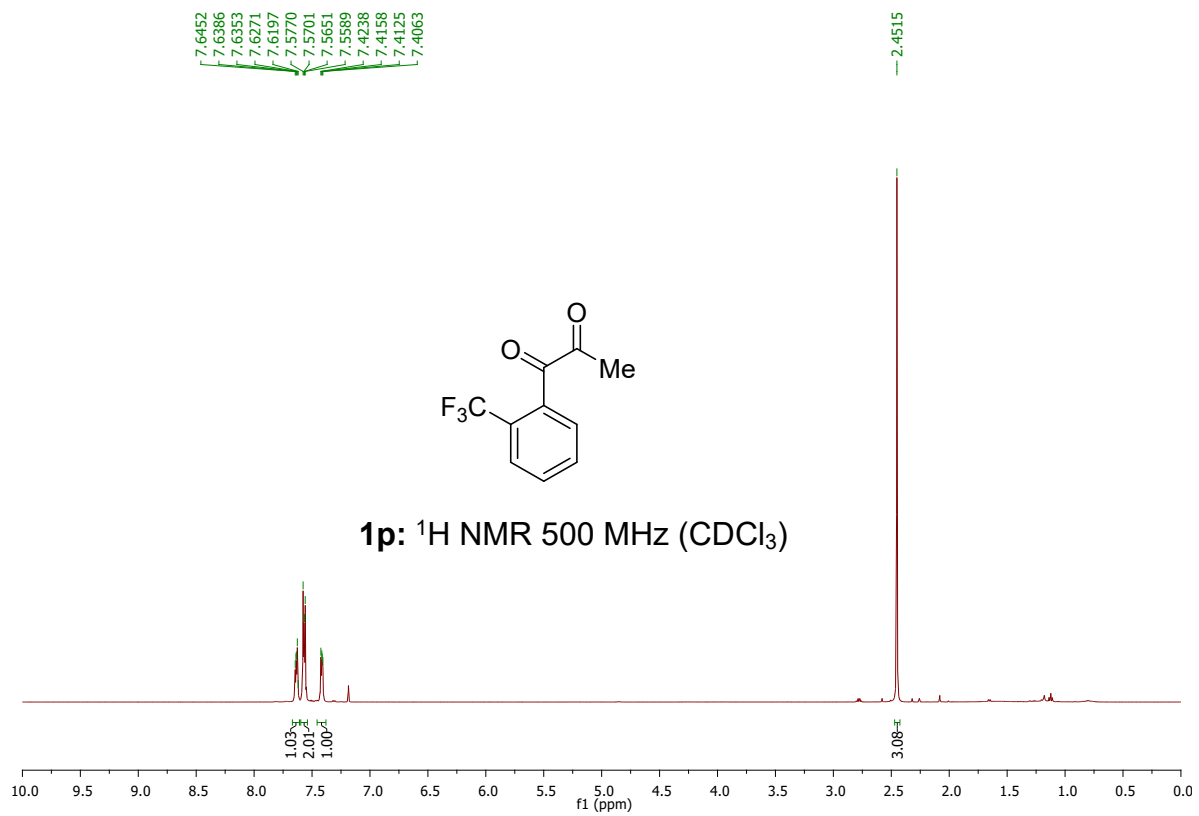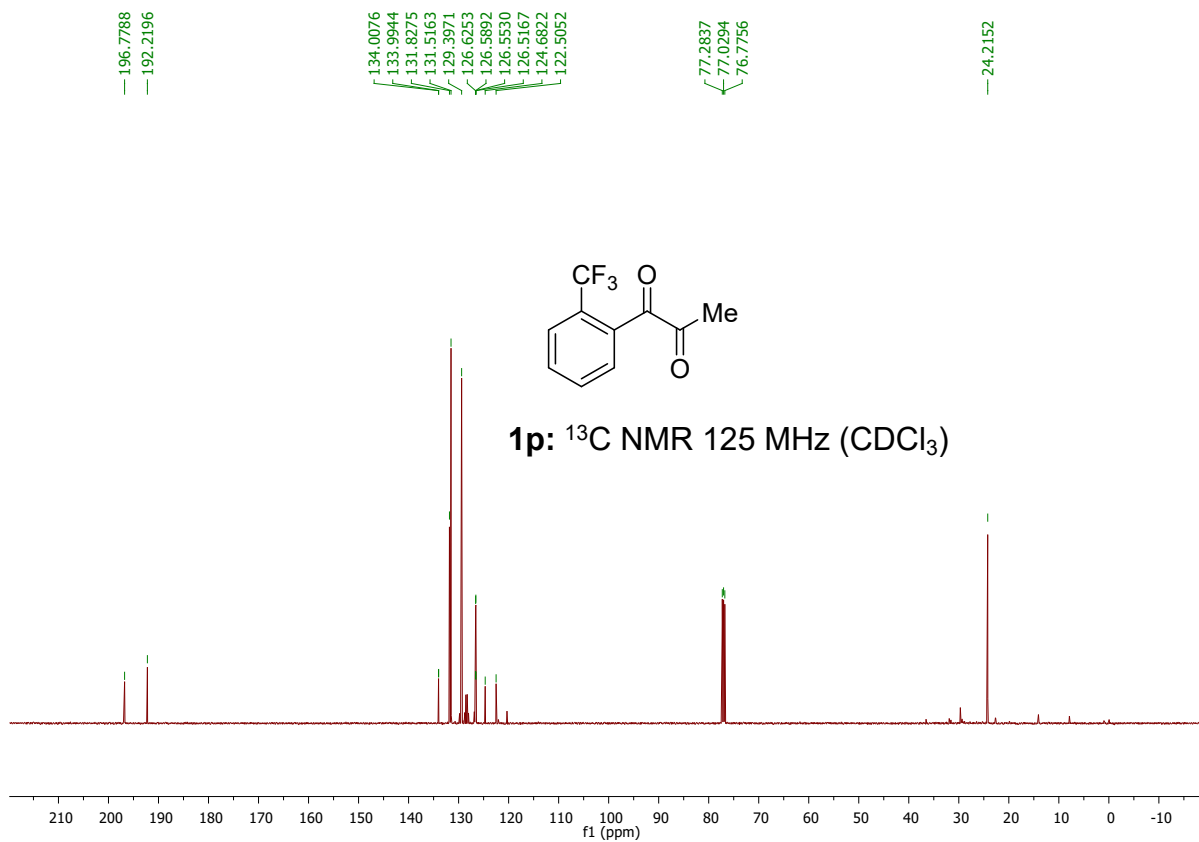

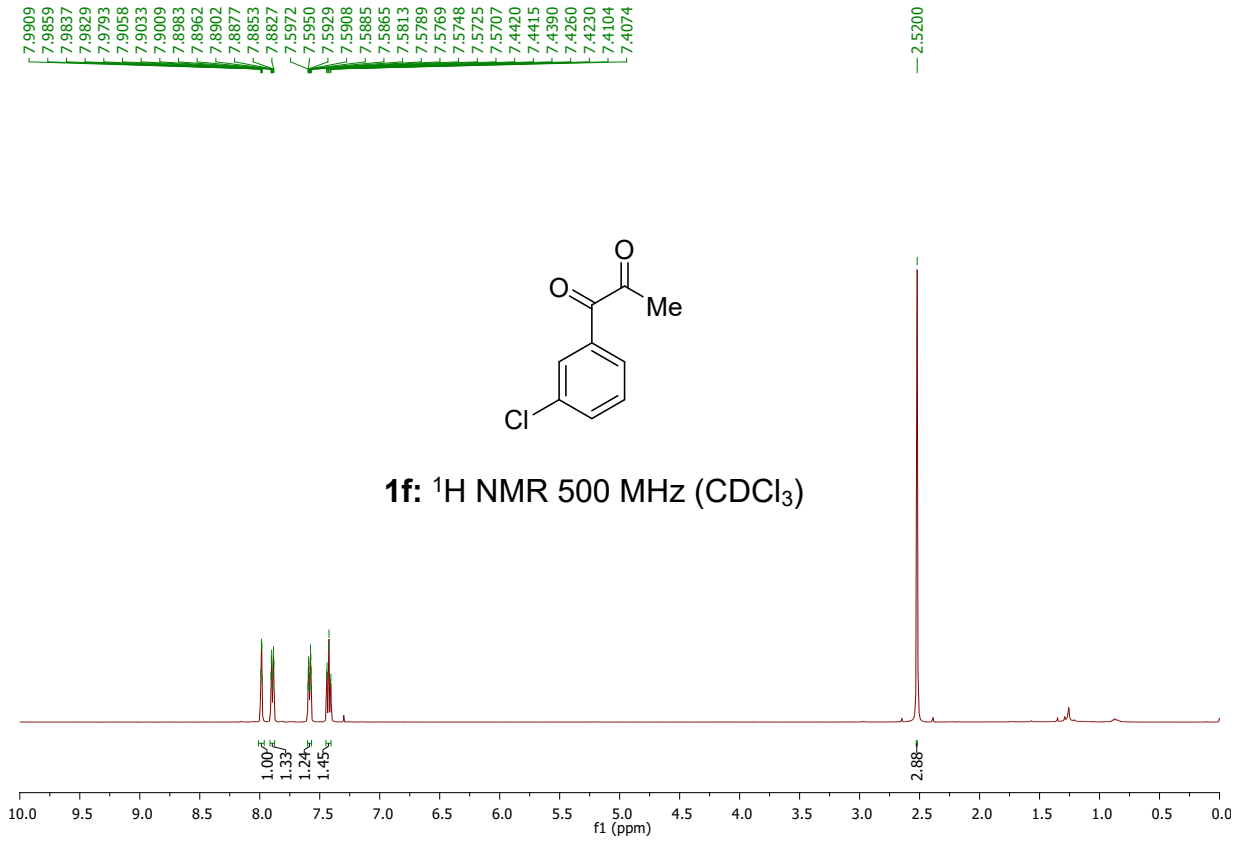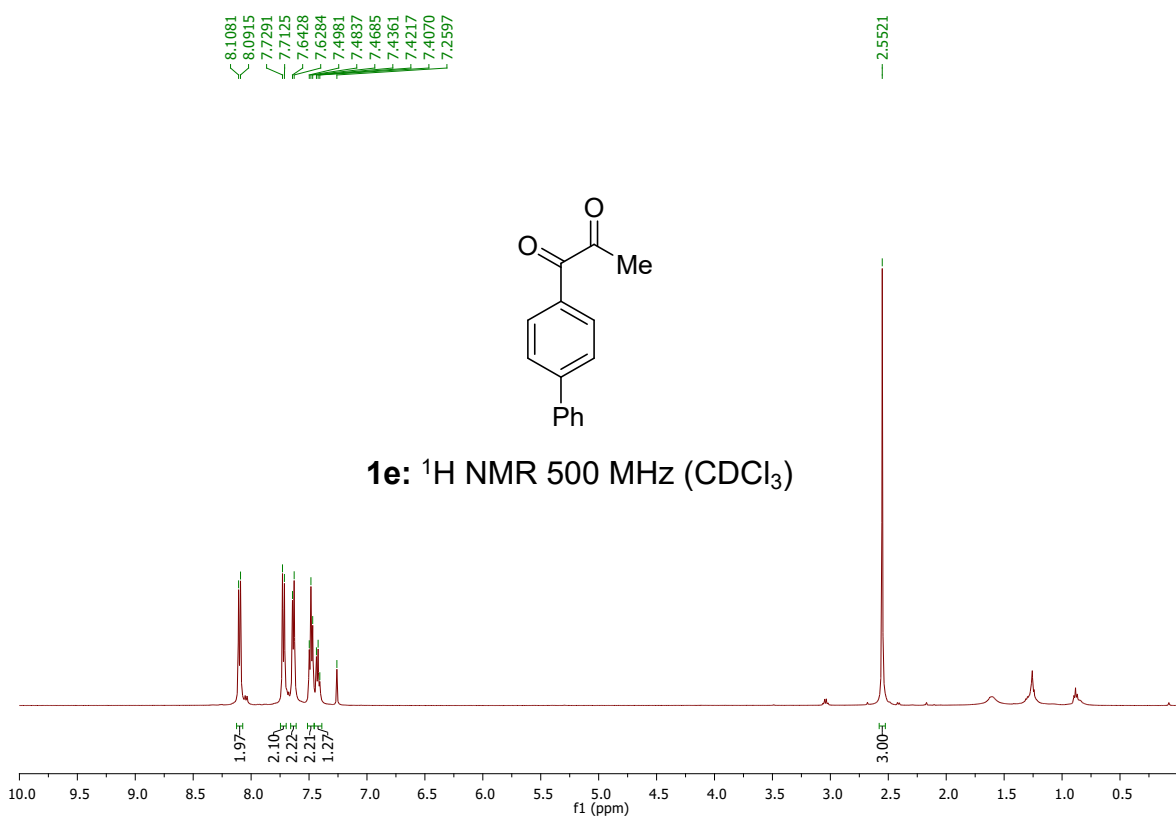

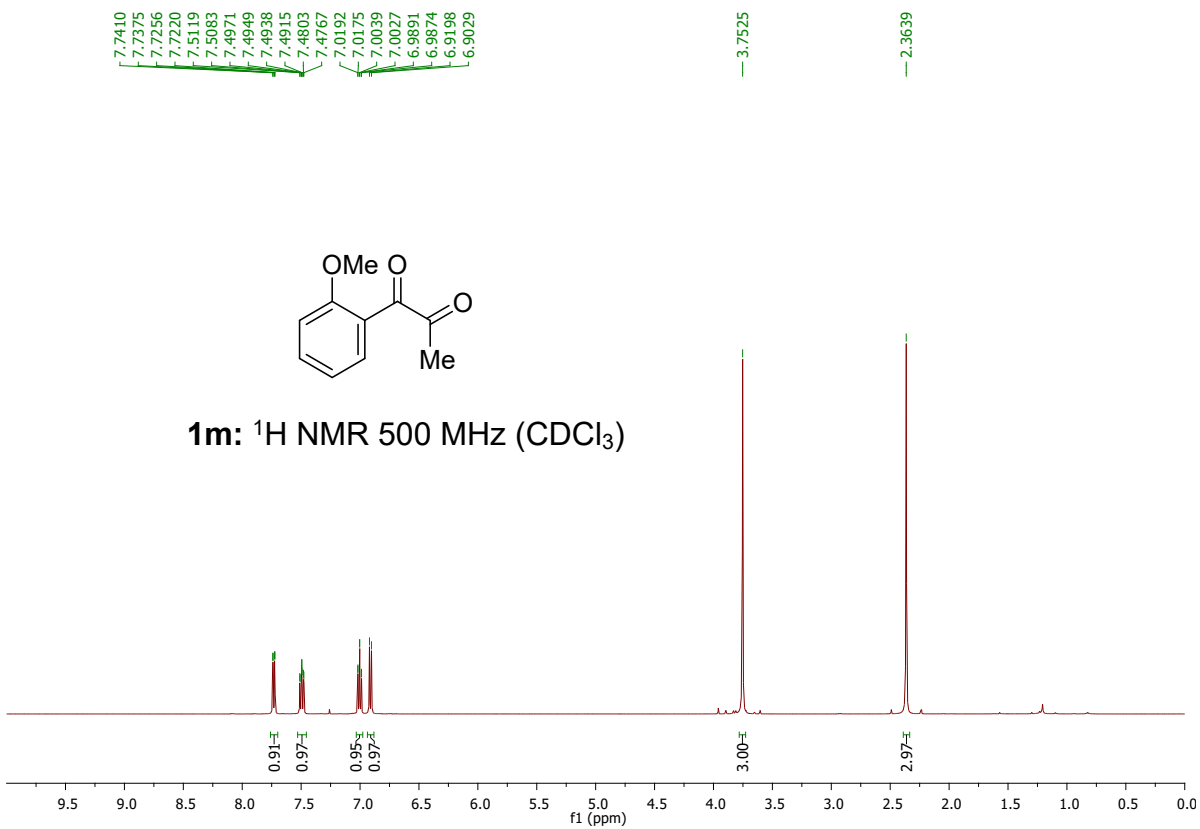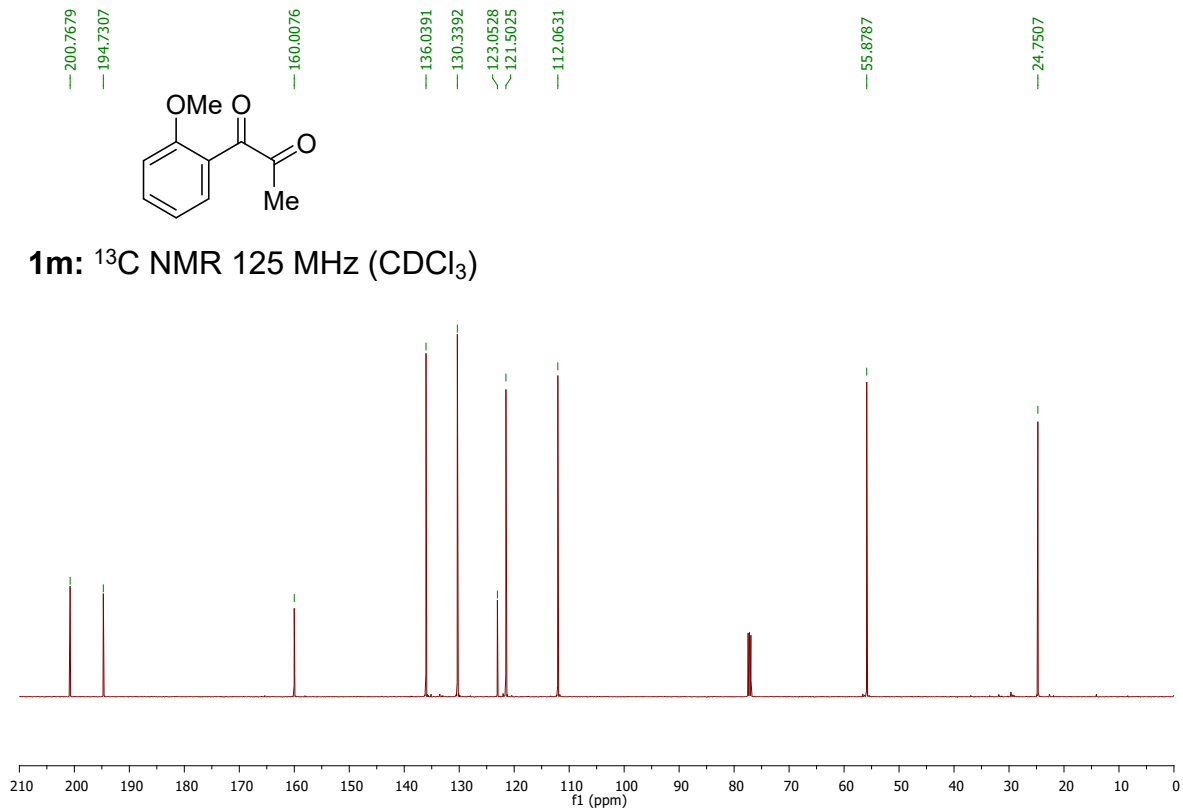

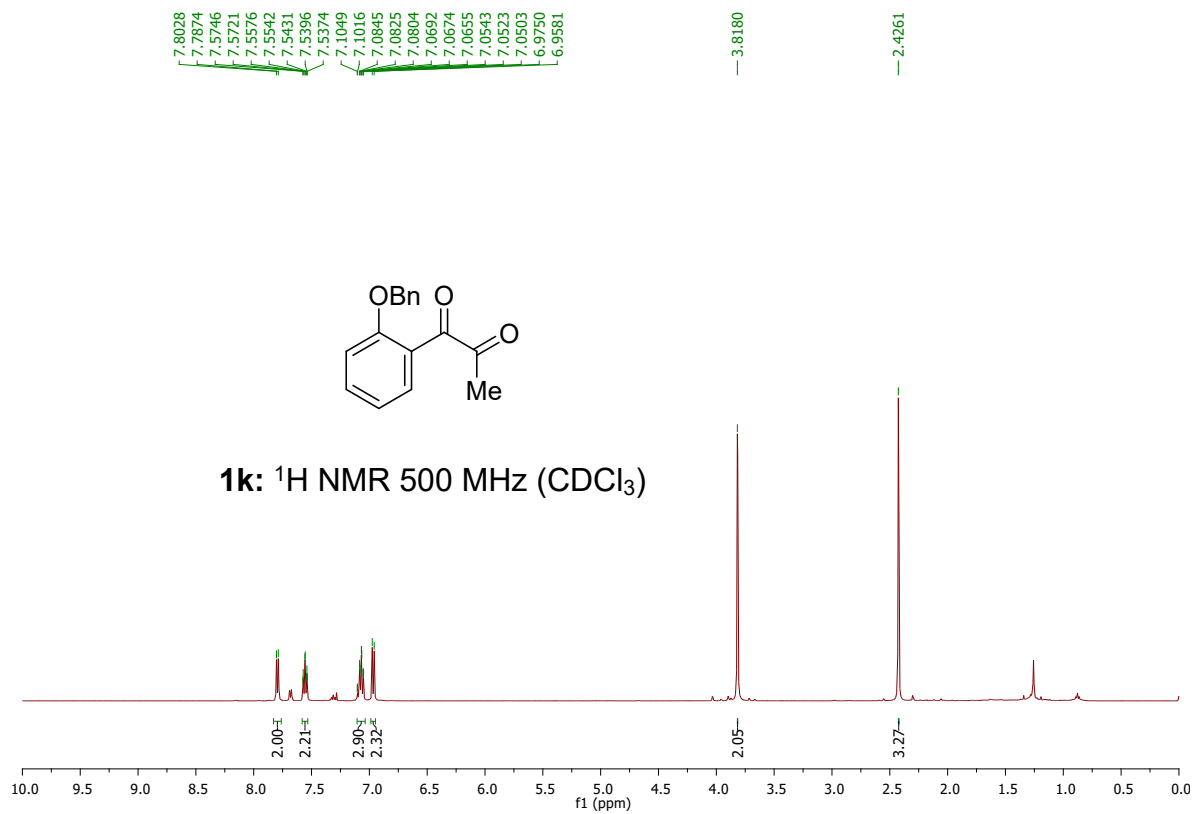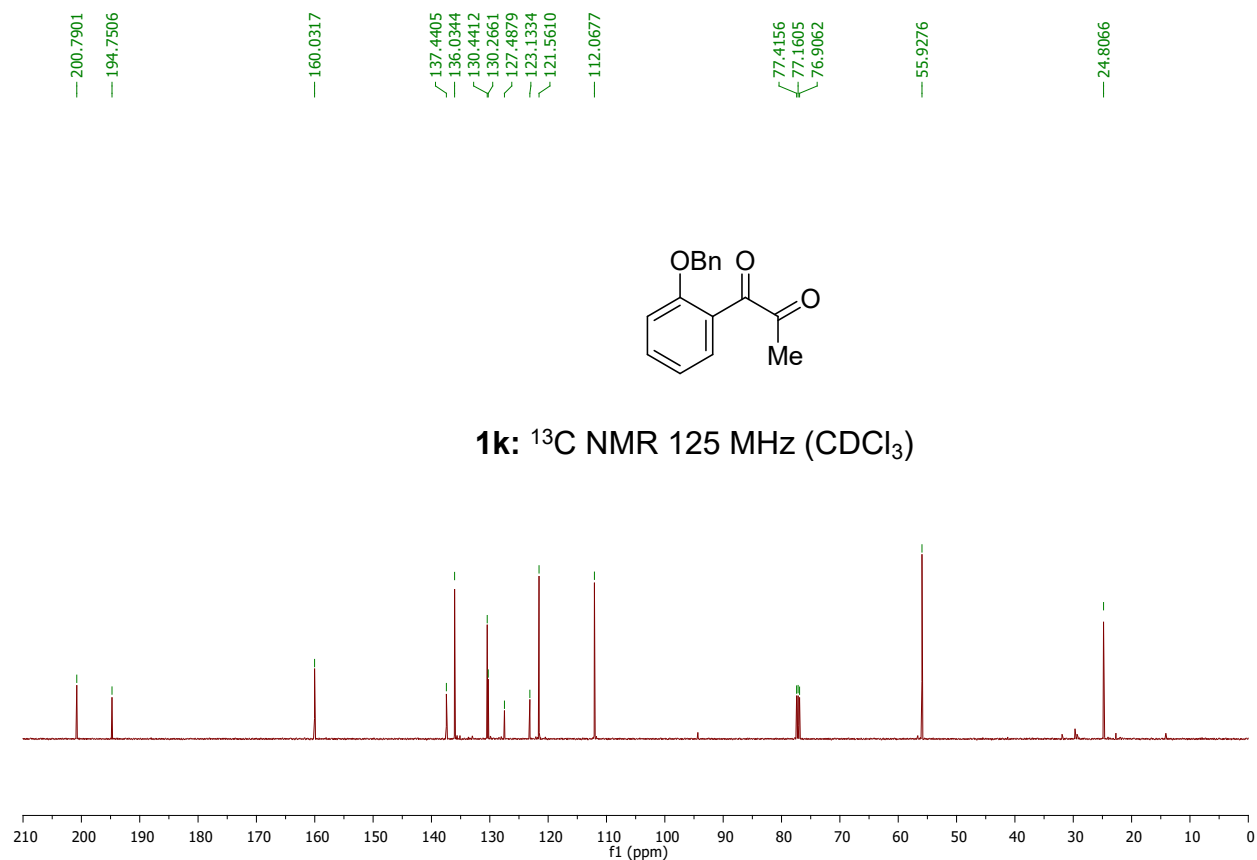

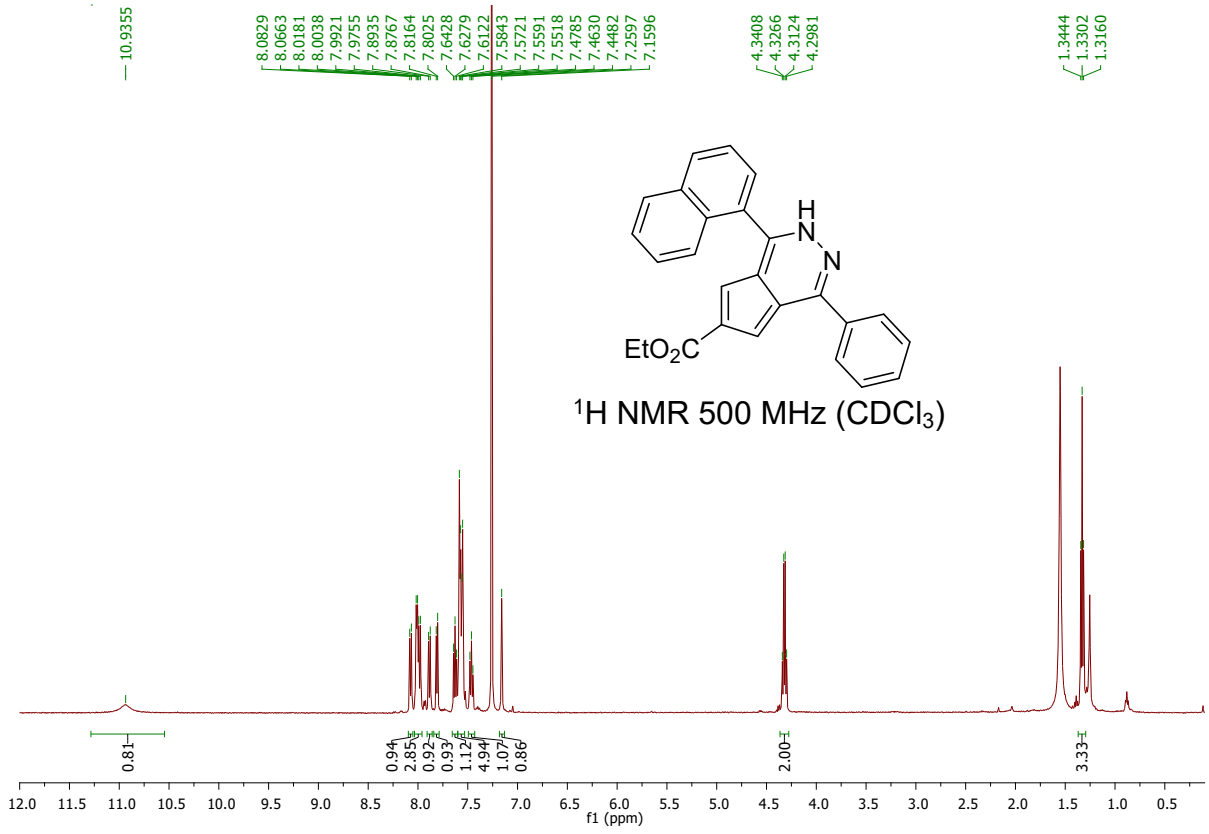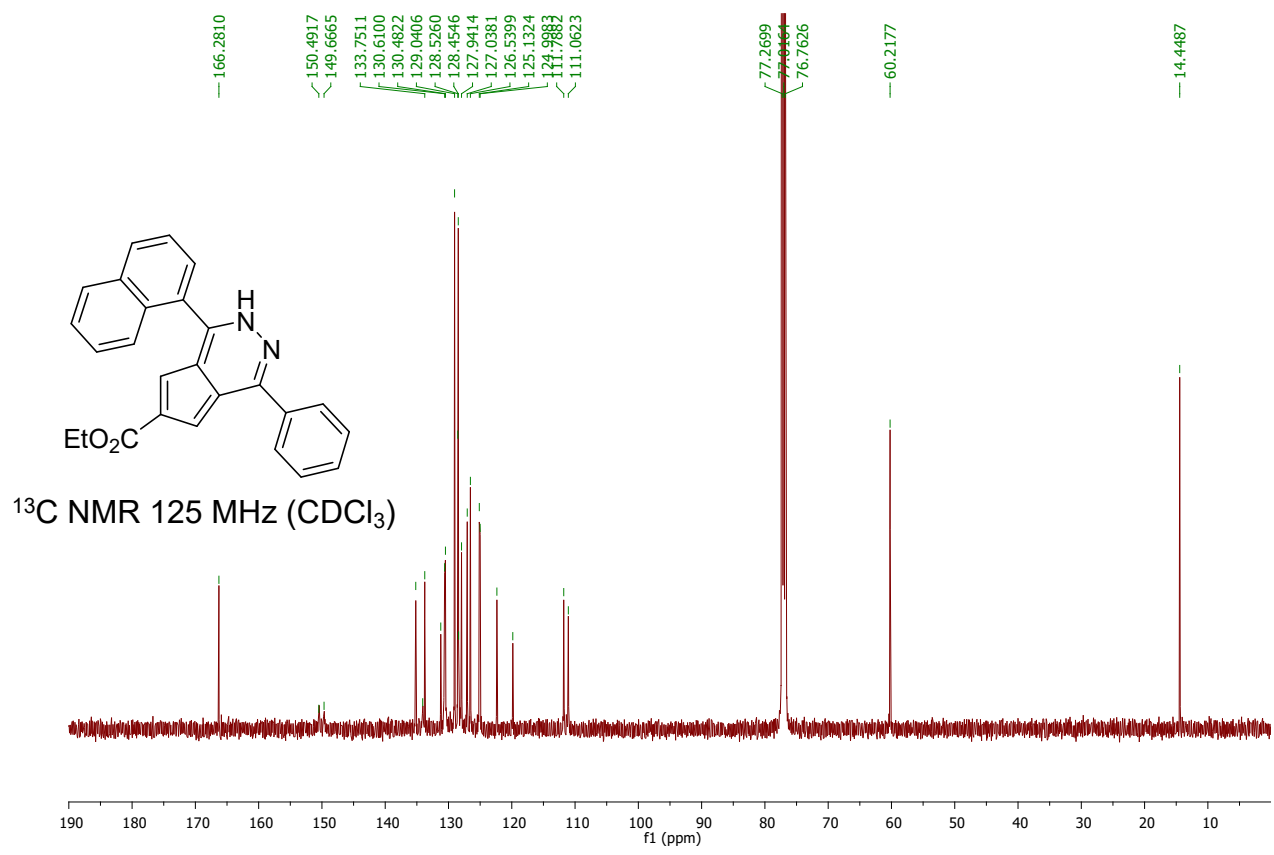

**Crystallographic data:** Single crystal X-ray structural of compound **3aj** was measured on the Bruker D8 Quest Single Crystal - XRD at 150(2) K using graphite monochromated Mo K $\alpha$  radiation ( $\lambda = 0.71073$  Å). The strategy for the Data collection was evaluated by using the CrysAlisPro CCD software. The data were collected by the standard 'phi-omega scan techniques, and were scaled and reduced using CrysAlisPro RED software. The structure was solved by direct methods using SHELXS-97, and refined by full matrix least-squares with SHELXL-97, refining on  $F^2$ . The positions of all the atoms were obtained by direct methods. All non-hydrogen atoms were refined anisotropically. The remaining hydrogen atoms were placed in geometrically constrained positions, and refined with isotropic temperature factors, generally 1.2U $_{eq}$  of their parent atoms. The crystal data are summarized in Table S1. The **CCDC** number of compound **3aj** (**2169277**) can be obtained free of charge via [www.ccdc.cam.ac.uk](http://www.ccdc.cam.ac.uk) (or from the Cambridge Crystallographic Data Centre, 12 union Road, Cambridge CB21 EZ, UK; Fax: (+44) 1223-336-033; or [deposit@ccdc.cam.ac.uk](mailto:deposit@ccdc.cam.ac.uk)).

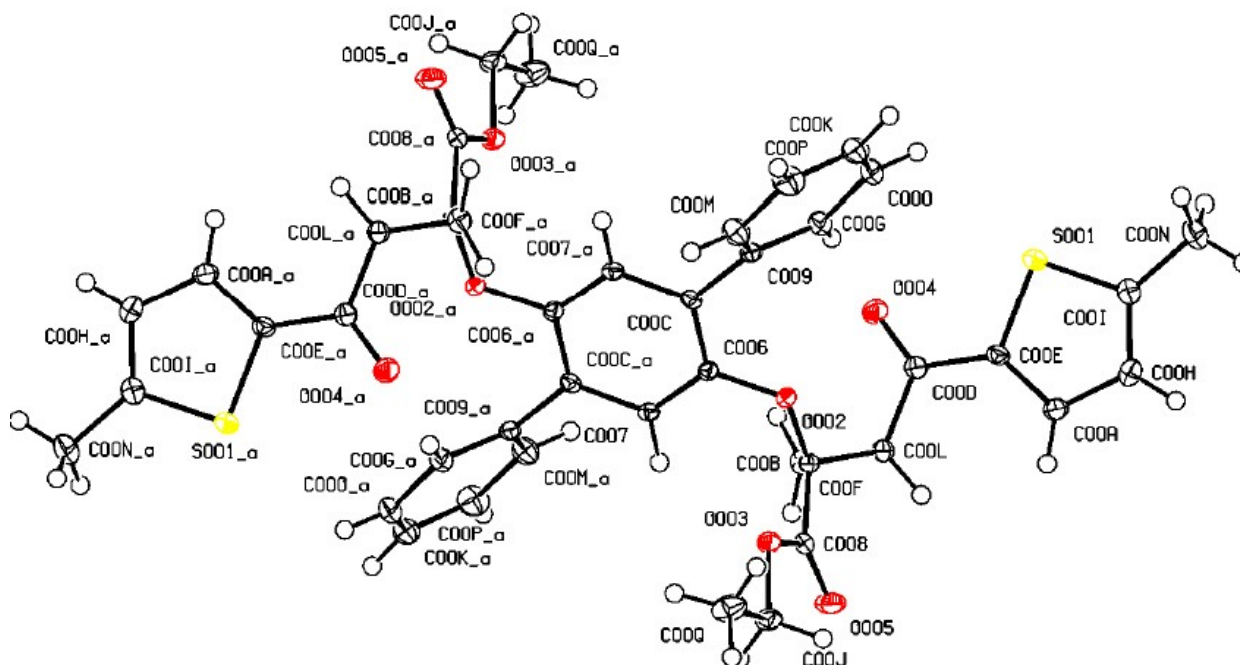

**Figure S1 .** ORTEP diagram of compound **3aj** (CCDC 2169277), thermal ellipsoids drawn at the 50% probability level.

**Table S1. Crystal data for compound 3aj**

|                                                  |                                                               |
|--------------------------------------------------|---------------------------------------------------------------|
| Compound                                         | <b>3aj</b>                                                    |
| Empirical formula                                | C <sub>21</sub> H <sub>19</sub> O <sub>4</sub> S              |
| Formula weight                                   | 367.42                                                        |
| Temperature                                      | 273.15 K                                                      |
| Wave length (Å )                                 | 0.71073 Å                                                     |
| Crystal system, space group                      | Triclinic, P -1                                               |
| <i>a</i> (Å)                                     | <i>a</i> = 8.6775(6) Å                                        |
| <i>b</i> (Å)                                     | <i>b</i> = 9.7016(6) Å                                        |
| <i>c</i> (Å)                                     | <i>c</i> = 11.8817(8) Å                                       |
| $\alpha$ (°)                                     | $\alpha$ = 86.390(2) deg.                                     |
| $\beta$ (°)                                      | $\beta$ = 79.605(2) deg.                                      |
| $\gamma$ (°)                                     | $\gamma$ = 66.426(2) deg.                                     |
| Volume (Å <sup>3</sup> )                         | 901.70(10) Å <sup>3</sup>                                     |
| Z, Calculated density (mg/m <sup>3</sup> )       | 2, 1.353 Mg/m <sup>3</sup>                                    |
| Absorption coefficient (mm <sup>-1</sup> )       | 0.203 mm <sup>-1</sup>                                        |
| F(000)                                           | 386                                                           |
| $\Theta$ range (deg)                             | 2.68 to 28.22 deg.                                            |
| Limiting indices                                 | -11 ≤ <i>h</i> ≤ 11, -12 ≤ <i>k</i> ≤ 12, -15 ≤ <i>l</i> ≤ 15 |
| Reflections collected / unique                   | 20304 / 4474 [R(int) = 0.0447]                                |
| Completeness to $\Theta = 25.242$                | 99.6 %                                                        |
| Max. and min. transmission                       | 0.746 and 0.665                                               |
| Absorption correction                            | none                                                          |
| Data / restraints / parameters                   | 4474/ 0 / 241                                                 |
| Goodness-of-fit on F <sup>2</sup>                | 1.100                                                         |
| Final R indices [I > 2σ(I)]                      | R1 = 0.0367, wR2 = 0.0981                                     |
| R indices (all data)                             | R1 = 0.0440, wR2 = 0.1084                                     |
| Extinction coefficient                           | n/a                                                           |
| Largest diff. peak and hole (e.Å <sup>-3</sup> ) | 0.399 and -0.310 e.Å <sup>-3</sup>                            |
| CCDC                                             | <b>2169277</b>                                                |

**Crystallographic data:** Single crystal X-ray structural of compound **4qa** was measured on the Bruker D8 Quest Single Crystal - XRD at 150(2) K using graphite monochromated Mo K $\alpha$  radiation ( $\lambda = 0.71073$  Å). The strategy for the Data collection was evaluated by using the CrysAlisPro CCD software. The data were collected by the standard 'phi-omega scan techniques, and were scaled and reduced using CrysAlisPro RED software. The structure was solved by direct methods using SHELXS-97, and refined by full matrix least-squares with SHELXL-97, refining on  $F^2$ . The positions of all the atoms were obtained by direct methods. All non-hydrogen atoms were refined anisotropically. The remaining hydrogen atoms were placed in geometrically constrained positions, and refined with isotropic temperature factors, generally 1.2U $_{eq}$  of their parent atoms. The crystal data are summarized in Table S2. The **CCDC** number of compound **4qa** (**2169276**) can be obtained free of charge via [www.ccdc.cam.ac.uk](http://www.ccdc.cam.ac.uk) (or from the Cambridge Crystallographic Data Centre, 12 union Road, Cambridge CB21 EZ, UK; Fax: (+44) 1223-336-033; or [deposit@ccdc.cam.ac.uk](mailto:deposit@ccdc.cam.ac.uk)).

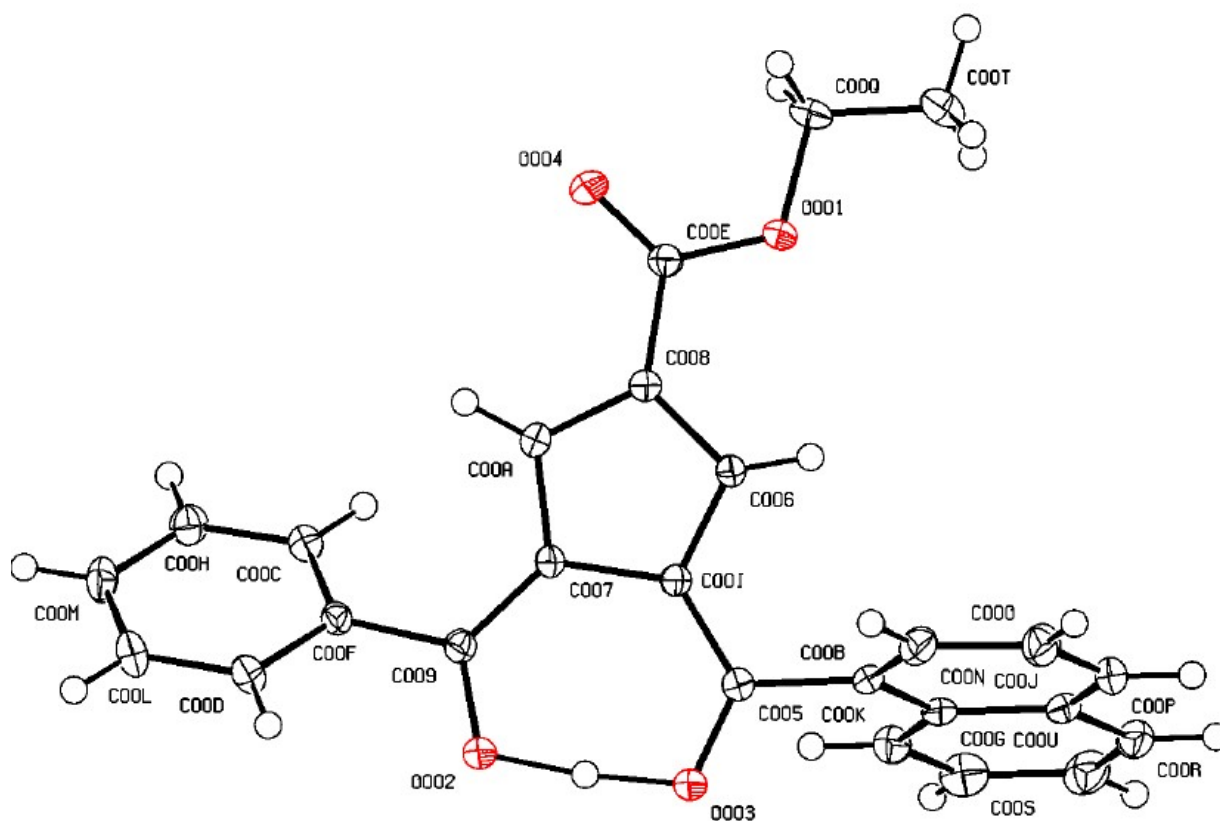

**Figure S2.** ORTEP diagram of compound **4qa** (CCDC 2169276), thermal ellipsoids drawn at the 50% probability level.



**Table S2. Crystal data for compound 4qa.**

|                                                  |                                                             |
|--------------------------------------------------|-------------------------------------------------------------|
| Compound                                         | <b>4qa</b>                                                  |
| Empirical formula                                | C <sub>26</sub> H <sub>20</sub> O <sub>4</sub>              |
| Formula weight                                   | 396.42                                                      |
| Temperature                                      | 273.15 K                                                    |
| Wave length (Å)                                  | 0.71073 Å                                                   |
| Crystal system, space group                      | Monoclinic, P 1 2 <sub>1</sub> /n 1                         |
| <i>a</i> (Å)                                     | <i>a</i> = 7.3447(5)Å                                       |
| <i>b</i> (Å)                                     | <i>b</i> = 21.7403(15)Å                                     |
| <i>c</i> (Å)                                     | <i>c</i> = 12.7291(10) Å                                    |
| $\alpha$ (°)                                     | alpha = 90 deg.                                             |
| $\beta$ (°)                                      | beta = 103.687(2)deg.                                       |
| $\gamma$ (°)                                     | gamma = 90 deg.                                             |
| Volume (Å <sup>3</sup> )                         | 1974.8(2) Å <sup>3</sup>                                    |
| Z, Calculated density (mg/m <sup>3</sup> )       | 4, 1.333 Mg/m <sup>3</sup>                                  |
| Absorption coefficient (mm <sup>-1</sup> )       | 0.089 mm <sup>-1</sup>                                      |
| F(000)                                           | 832                                                         |
| $\Theta$ range (deg)                             | 2.495 to 28.309 deg.                                        |
| Limiting indices                                 | -9<= <i>h</i> <=9, -28<= <i>k</i> <=28, -16<= <i>l</i> <=16 |
| Reflections collected / unique                   | 31839 / 4896 [R(int) = 0.0536]                              |
| Completeness to $\Theta = 25.242$                | 99.8 %                                                      |
| Max. and min. transmission                       | 0.7457 and 0.7019                                           |
| Absorption correction                            | multi-scan                                                  |
| Data / restraints / parameters                   | 4896 / 0 / 276                                              |
| Goodness-of-fit on F <sup>2</sup>                | 1.190                                                       |
| Final R indices [I>2 $\sigma$ (I)]               | R1 = 0.0453, wR2 = 0.1469                                   |
| R indices (all data)                             | R1 = 0.0573, wR2 = 0.1621                                   |
| Extinction coefficient                           | n/a                                                         |
| Largest diff. peak and hole (e.Å <sup>-3</sup> ) | 0.360 and -0.242 e.Å <sup>-3</sup>                          |
| CCDC                                             | <b>2169276</b>                                              |

**Crystallographic data:** Single crystal X-ray structural of compound **4vh** was measured on the SuperNova, Dual, Mo at home/near, Eos- XRD at 150(2) K using graphite monochromated Mo K $\alpha$  radiation ( $\lambda = 0.71073$  Å). The strategy for the Data collection was evaluated by using the CrysAlisPro CCD software. The data were collected by the standard 'phi-omega scan techniques, and were scaled and reduced using CrysAlisPro RED software. The structure was solved by direct methods using SHELXS-97, and refined by full matrix least-squares with SHELXL-97, refining on  $F^2$ . The positions of all the atoms were obtained by direct methods. All non-hydrogen atoms were refined anisotropically. The remaining hydrogen atoms were placed in geometrically constrained positions, and refined with isotropic temperature factors, generally 1.2Ueq of their parent atoms. The crystal data are summarized in Table S3. The CCDC number of compound **4vh** (**2169275**) can be obtained free of charge via [www.ccdc.cam.ac.uk](http://www.ccdc.cam.ac.uk) (or from the Cambridge Crystallographic Data Centre, 12 union Road, Cambridge CB21 EZ, UK; Fax: (+44) 1223-336-033; or [deposit@ccdc.cam.ac.uk](mailto:deposit@ccdc.cam.ac.uk)).

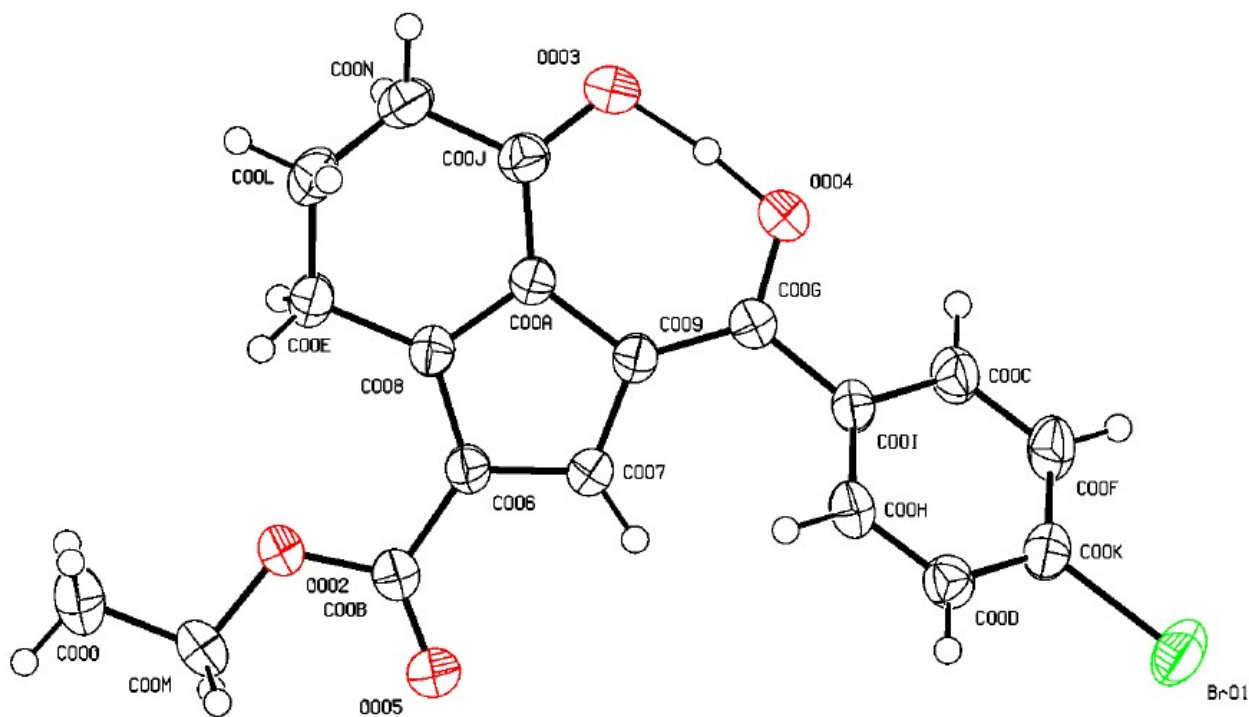

**Figure S3.** ORTEP diagram of compound **4vh** (CCDC 2169275), thermal ellipsoids drawn at the 50% probability level.

**Table S3. Crystal data for compound 4vh.**

|                                                  |                                                   |
|--------------------------------------------------|---------------------------------------------------|
| Compound                                         | <b>4vh</b>                                        |
| Empirical formula                                | C <sub>19</sub> H <sub>17</sub> Br O <sub>4</sub> |
| Formula weight                                   | 389.23                                            |
| Temperature                                      | 293 K                                             |
| Wave length (Å )                                 | 0.71073 Å                                         |
| Crystal system, space group                      | Monoclinic, P 21/c                                |
| <i>a</i> (Å)                                     | a = 8.8846(3) Å                                   |
| <i>b</i> (Å)                                     | b = 10.4690(6) Å                                  |
| <i>c</i> (Å)                                     | c = 18.3384(9) Å                                  |
| $\alpha$ (°)                                     | alpha = 90(4) deg.                                |
| $\beta$ (°)                                      | beta = 79.975 deg.                                |
| $\gamma$ (°)                                     | gamma = 90 (4) deg.                               |
| Volume (Å <sup>3</sup> )                         | 1679.66(14) Å <sup>3</sup>                        |
| Z, Calculated density (mg/m <sup>3</sup> )       | 4, 1.539 Mg/m <sup>3</sup>                        |
| Absorption coefficient (mm <sup>-1</sup> )       | 2.467 mm <sup>-1</sup>                            |
| F(000)                                           | 792                                               |
| $\Theta$ range (deg)                             | 3.3510 to 28.5250 deg.                            |
| Limiting indices                                 | -11 ≤ h ≤ 11, -14 ≤ k ≤ 14, -24 ≤ l ≤ 24          |
| Reflections collected / unique                   | 19410 / 4138 [R(int) = 0.0444]                    |
| Completeness to $\Theta = 25.242$                | 99.9 %                                            |
| Max. and min. transmission                       | 35 and 25                                         |
| Absorption correction                            | none                                              |
| Data / restraints / parameters                   | 4138/ 0 / 223                                     |
| Goodness-of-fit on F <sup>2</sup>                | 1.039                                             |
| Final R indices [I > 2σ(I)]                      | R1 = 0.0346, wR2 = 0.0793                         |
| R indices (all data)                             | R1 = 0.0504, wR2 = 0.0874                         |
| Extinction coefficient                           | n/a                                               |
| Largest diff. peak and hole (e.Å <sup>-3</sup> ) | 0.385 and -0.469 e.Å <sup>-3</sup>                |
| CCDC                                             | <b>2169275</b>                                    |
